# Supplementary material
Source: PubMed Central journal article supplement (PMC5878974)
Supplement: NIHMS912428-supplement-supplement_1.pdf [file NIHMS912428-supplement-supplement_1.pdf]

**e-Table 1: Measures of Inter-site and Intra-site Variability Associated with Quantitative MRI Techniques/Metrics**

| <b>MRI technique/metric</b>                                               | <b>Intra-site variability metric</b>                             | <b>Intra-site variability</b> | <b>Inter-site variability metric</b>      | <b>Inter-site variability</b> | <b>Interpretation</b>                                              |
|---------------------------------------------------------------------------|------------------------------------------------------------------|-------------------------------|-------------------------------------------|-------------------------------|--------------------------------------------------------------------|
| T2 lesion volume (manual)                                                 | Standard deviation of mean difference between scans at each site | 0.79 mL                       | Proportion of variation explained by site | 92%                           | excellent intra-site, relatively poorer inter-site reliability     |
| Total brain volume (automated – MaCRUISE)                                 | Standard deviation of mean difference between scans at each site | 10.1 mL                       | Proportion of variation explained by site | 89%                           | excellent intra-site, relatively poorer inter-site reliability     |
| MTR (NAWM)                                                                | r                                                                | 0.99                          | ICC                                       | 0.91                          | excellent intra- and inter-site reliability                        |
| R1 (NAWM)                                                                 | r                                                                | 0.96                          | ICC                                       | 0.97                          | excellent intra- and inter-site reliability                        |
| DWI (FA of NAWM)                                                          | r                                                                | 0.99                          | ICC                                       | 0.91                          | excellent intra- and inter-site reliability                        |
| rsfMRI<br>-intra-regional connectivity<br>-intra-hemispheric connectivity | r                                                                | 0.80                          | ICC                                       | 0.40                          | adequate intra-site reliability, suboptimal inter-site reliability |
| UCCA                                                                      | Average test-retest COV of UCCA                                  | 0.018                         | COV                                       | 0.043                         | significant intra- and inter-site variability                      |

\*MaCRUISE = Multi-atlas Segmentation with Brain Surface Estimation; MTR = magnetization-transfer ratio; NAWM = normal appearing white matter; ICC = intra-class correlation coefficient; DWI = diffusion-weighted imaging; FA = fractional anisotropy; r = Pearson's correlation coefficient; rsfMRI = resting-state functional MRI; UCCA = upper cervical cord area; COV = coefficient of variation

## SIEMENS MAGNETOM TrioTim syngo MR B17

\\USER\Rooney\NAIMS\V17\_20150527\localizer

TA: 0:19 PAT: Off Voxel size: 1.9x1.5x8.0 mm Rel. SNR: 1.00 SIEMENS: gre

## Properties

|                                               |        |
|-----------------------------------------------|--------|
| Prio Recon                                    | Off    |
| Before measurement                            |        |
| After measurement                             |        |
| Load to viewer                                | On     |
| Inline movie                                  | Off    |
| Auto store images                             | On     |
| Load to stamp segments                        | On     |
| Load images to graphic segments               | Off    |
| Auto open inline display                      | Off    |
| Start measurement without further preparation | On     |
| Wait for user to start                        | On     |
| Start measurements                            | single |

## Routine

|                    |                  |
|--------------------|------------------|
| Slice group 1      |                  |
| Slices             | 3                |
| Dist. factor       | 20 %             |
| Position           | L0.0 P0.0 F30.0  |
| Orientation        | Sagittal         |
| Phase enc. dir.    | A >> P           |
| Rotation           | 0.00 deg         |
| Slice group 2      |                  |
| Slices             | 1                |
| Dist. factor       | 20 %             |
| Position           | R1.6 A22.5 F56.2 |
| Orientation        | Coronal          |
| Phase enc. dir.    | R >> L           |
| Rotation           | 0.00 deg         |
| Slice group 3      |                  |
| Slices             | 2                |
| Dist. factor       | 100 %            |
| Position           | R1.6 A12.9 F30.5 |
| Orientation        | T > C-9.2        |
| Phase enc. dir.    | R >> L           |
| Rotation           | 90.00 deg        |
| Phase oversampling | 0 %              |
| FoV read           | 280 mm           |
| FoV phase          | 100.0 %          |
| Slice thickness    | 8.0 mm           |
| TR                 | 20.0 ms          |
| TE                 | 5.00 ms          |
| Averages           | 1                |
| Concatenations     | 6                |
| Filter             | Raw filter       |
| Coil elements      | HEA;HEP          |

## Contrast

|                   |                  |
|-------------------|------------------|
| TD                | 0 ms             |
| MTC               | Off              |
| Magn. preparation | None             |
| Flip angle        | 40 deg           |
| Fat suppr.        | None             |
| Water suppr.      | None             |
| -----             |                  |
| Averaging mode    | Short term       |
| Reconstruction    | Magnitude        |
| Measurements      | 1                |
| Multiple series   | Each measurement |

## Resolution

|                  |      |
|------------------|------|
| Base resolution  | 192  |
| Phase resolution | 75 % |

|                       |           |
|-----------------------|-----------|
| Phase partial Fourier | Off       |
| Interpolation         | Off       |
| -----                 |           |
| PAT mode              | None      |
| Matrix Coil Mode      | Auto (CP) |
| -----                 |           |
| Image Filter          | Off       |
| Distortion Corr.      | Off       |
| Prescan Normalize     | Off       |
| Normalize             | Off       |
| B1 filter             | Off       |
| Raw filter            | On        |
| Intensity             | Weak      |
| Slope                 | 25        |
| Elliptical filter     | Off       |

## Geometry

|                  |            |
|------------------|------------|
| Multi-slice mode | Sequential |
| Series           | Ascending  |
| -----            |            |
| Saturation mode  | Standard   |
| Special sat.     | None       |
| -----            |            |
| Tim CT mode      | Off        |

## System

|                          |                  |
|--------------------------|------------------|
| Body                     | Off              |
| HEP                      | On               |
| HEA                      | On               |
| -----                    |                  |
| Positioning mode         | REF              |
| Table position           | H                |
| Table position           | 0 mm             |
| MSMA                     | S - C - T        |
| Sagittal                 | R >> L           |
| Coronal                  | A >> P           |
| Transversal              | F >> H           |
| Save uncombined          | Off              |
| Coil Combine Mode        | Adaptive Combine |
| AutoAlign                | ---              |
| Auto Coil Select         | Default          |
| -----                    |                  |
| Shim mode                | Tune up          |
| Adjust with body coil    | Off              |
| Confirm freq. adjustment | Off              |
| Assume Silicone          | Off              |
| ? Ref. amplitude 1H      | 0.000 V          |
| Adjustment Tolerance     | Auto             |
| Adjust volume            |                  |
| Position                 | Isocenter        |
| Orientation              | Transversal      |
| Rotation                 | 0.00 deg         |
| R >> L                   | 350 mm           |
| A >> P                   | 263 mm           |
| F >> H                   | 350 mm           |

## Physio

|                 |      |
|-----------------|------|
| 1st Signal/Mode | None |
| Segments        | 1    |
| -----           |      |
| Tagging         | None |
| Dark blood      | Off  |
| -----           |      |
| Resp. control   | Off  |

## Inline

|                    |     |
|--------------------|-----|
| Subtract           | Off |
| Liver registration | Off |
| Std-Dev-Sag        | Off |

## SIEMENS MAGNETOM Skyra syngo MR D13

\\USER\NIB\TNU\_Clinical\NAIIMS\_VD13A\_15MAY2015\AAHScout\_32ch  
TA:0:14 PAT:3 Voxel size:1.6×1.6×1.6 mm Rel. SNR:1.00 :fl

## Properties

|                                 |        |
|---------------------------------|--------|
| Prio Recon                      | Off    |
| Load to viewer                  | On     |
| Inline movie                    | Off    |
| Auto store images               | On     |
| Load to stamp segments          | Off    |
| Load images to graphic segments | Off    |
| Auto open inline display        | Off    |
| Wait for user to start          | Off    |
| Start measurements              | single |

## Routine

|                    |                   |
|--------------------|-------------------|
| Nr. of slab groups | 1                 |
| Slabs              | 1                 |
| Dist. factor       | 20 %              |
| Position           | Isocenter         |
| Orientation        | Sagittal          |
| Phase enc. dir.    | A >> P            |
| Phase oversampling | 0 %               |
| Slice oversampling | 0.0 %             |
| FoV read           | 260 mm            |
| FoV phase          | 100.0 %           |
| Slice thickness    | 1.6 mm            |
| TR                 | 3.15 ms           |
| TE                 | 1.37 ms           |
| Averages           | 1                 |
| Concatenations     | 1                 |
| Filter             | Prescan Normalize |
| Coil elements      | HEA;HEP           |
| AutoAlign          | Head              |

## Contrast

|                |            |
|----------------|------------|
| Flip angle     | 8 deg      |
| Averaging mode | Short term |
| Measurements   | 1          |
| Reconstruction | Magnitude  |

## SIEMENS MAGNETOM Verio syngo MR B17

\USER\DAVIS\_RESEARCH\Sicotte\MS\localizer

TA: 0:13 PAT: Off Voxel size: 1.1x1.0x7.0 mm Rel. SNR: 1.00 SIEMENS: gre

## Properties

|                                               |        |
|-----------------------------------------------|--------|
| Prio Recon                                    | Off    |
| Before measurement                            |        |
| After measurement                             |        |
| Load to viewer                                | On     |
| Inline movie                                  | Off    |
| Auto store images                             | On     |
| Load to stamp segments                        | Off    |
| Load images to graphic segments               | Off    |
| Auto open inline display                      | Off    |
| Start measurement without further preparation | Off    |
| Wait for user to start                        | Off    |
| Start measurements                            | single |

## Routine

|                    |                                      |
|--------------------|--------------------------------------|
| Slice group 1      |                                      |
| Slices             | 1                                    |
| Dist. factor       | 20 %                                 |
| Position           | Isocenter                            |
| Orientation        | Sagittal                             |
| Phase enc. dir.    | A >> P                               |
| Rotation           | 0.00 deg                             |
| Slice group 2      |                                      |
| Slices             | 1                                    |
| Dist. factor       | 20 %                                 |
| Position           | Isocenter                            |
| Orientation        | Transversal                          |
| Phase enc. dir.    | A >> P                               |
| Rotation           | 0.00 deg                             |
| Slice group 3      |                                      |
| Slices             | 1                                    |
| Dist. factor       | 20 %                                 |
| Position           | Isocenter                            |
| Orientation        | Coronal                              |
| Phase enc. dir.    | R >> L                               |
| Rotation           | 0.00 deg                             |
| Phase oversampling | 0 %                                  |
| FoV read           | 250 mm                               |
| FoV phase          | 100.0 %                              |
| Slice thickness    | 7.0 mm                               |
| TR                 | 8.6 ms                               |
| TE                 | 4.00 ms                              |
| Averages           | 2                                    |
| Concatenations     | 3                                    |
| Filter             | Prescan Normalize, Elliptical filter |
| Coil elements      | HEA;HEP                              |

## Contrast

|                   |                  |
|-------------------|------------------|
| TD                | 0 ms             |
| MTC               | Off              |
| Magn. preparation | None             |
| Flip angle        | 20 deg           |
| Fat suppr.        | None             |
| Water suppr.      | None             |
| SWI               | Off              |
| -----             |                  |
| Averaging mode    | Short term       |
| Reconstruction    | Magnitude        |
| Measurements      | 1                |
| Multiple series   | Each measurement |

## Resolution

|                       |           |
|-----------------------|-----------|
| Base resolution       | 256       |
| Phase resolution      | 90 %      |
| Phase partial Fourier | Off       |
| Interpolation         | On        |
| -----                 |           |
| PAT mode              | None      |
| Matrix Coil Mode      | Auto (CP) |
| -----                 |           |
| Image Filter          | Off       |
| Distortion Corr.      | Off       |
| Unfiltered images     | Off       |
| Prescan Normalize     | On        |
| Normalize             | Off       |
| B1 filter             | Off       |
| Raw filter            | Off       |
| Elliptical filter     | On        |
| Mode                  | Inplane   |

## Geometry

|                  |             |
|------------------|-------------|
| Multi-slice mode | Sequential  |
| Series           | Interleaved |
| -----            |             |
| Saturation mode  | Standard    |
| Special sat.     | None        |
| -----            |             |
| Table position   | H           |
| Table position   | 0 mm        |
| Inline Composing | Off         |
| -----            |             |
| Tim CT mode      | Off         |

## System

|                          |                  |
|--------------------------|------------------|
| Body                     | Off              |
| HEP                      | On               |
| HEA                      | On               |
| -----                    |                  |
| Positioning mode         | REF              |
| MSMA                     | S - C - T        |
| Sagittal                 | L >> R           |
| Coronal                  | A >> P           |
| Transversal              | F >> H           |
| Save uncombined          | Off              |
| Coil Combine Mode        | Adaptive Combine |
| AutoAlign                | ---              |
| Auto Coil Select         | Default          |
| -----                    |                  |
| Shim mode                | Tune up          |
| Adjust with body coil    | Off              |
| Confirm freq. adjustment | Off              |
| Assume Silicone          | Off              |
| ? Ref. amplitude 1H      | 0.000 V          |
| Adjustment Tolerance     | Auto             |
| Adjust volume            |                  |
| Position                 | Isocenter        |
| Orientation              | Transversal      |
| Rotation                 | 0.00 deg         |
| R >> L                   | 350 mm           |
| A >> P                   | 263 mm           |
| F >> H                   | 350 mm           |

## Physio

|                 |      |
|-----------------|------|
| 1st Signal/Mode | None |
| Segments        | 1    |
| -----           |      |
| Tagging         | None |
| Dark blood      | Off  |
| -----           |      |
| Resp. control   | Off  |

## SIEMENS MAGNETOM Verio syngo MR B17

## Inline

|                      |      |
|----------------------|------|
| Subtract             | Off  |
| Liver registration   | Off  |
| Std-Dev-Sag          | Off  |
| Std-Dev-Cor          | Off  |
| Std-Dev-Tra          | Off  |
| Std-Dev-Time         | Off  |
| MIP-Sag              | Off  |
| MIP-Cor              | Off  |
| MIP-Tra              | Off  |
| MIP-Time             | Off  |
| Save original images | On   |
| -----                |      |
| Wash - In            | Off  |
| Wash - Out           | Off  |
| TTP                  | Off  |
| PEI                  | Off  |
| MIP - time           | Off  |
| -----                |      |
| MapIt                | None |
| Contrasts            | 1    |

## Sequence

|                     |            |
|---------------------|------------|
| Introduction        | On         |
| Dimension           | 2D         |
| Phase stabilisation | Off        |
| Asymmetric echo     | Allowed    |
| Bandwidth           | 320 Hz/Px  |
| Flow comp.          | No         |
| Allowed delay       | 0 s        |
| -----               |            |
| RF pulse type       | Normal     |
| Gradient mode       | Normal     |
| Excitation          | Slice-sel. |
| RF spoiling         | On         |

## SIEMENS MAGNETOM Verio syngo MR B17

\\USER\DAVIS\_RESEARCH\Sicotte\MS\MPRAGE Axial

TA: 5:25 PAT: 2 Voxel size: 1.0x1.0x1.0 mm Rel. SNR: 1.00 SIEMENS: tfl

## Properties

|                                               |        |
|-----------------------------------------------|--------|
| Prio Recon                                    | Off    |
| Before measurement                            |        |
| After measurement                             |        |
| Load to viewer                                | On     |
| Inline movie                                  | Off    |
| Auto store images                             | On     |
| Load to stamp segments                        | Off    |
| Load images to graphic segments               | Off    |
| Auto open inline display                      | Off    |
| Start measurement without further preparation | On     |
| Wait for user to start                        | On     |
| Start measurements                            | single |

## Routine

|                    |                   |
|--------------------|-------------------|
| Slab group 1       |                   |
| Slabs              | 1                 |
| Dist. factor       | 50 %              |
| Position           | L7.8 A43.1 H23.3  |
| Orientation        | T > C3.5 > S3.4   |
| Phase enc. dir.    | R >> L            |
| Rotation           | 88.30 deg         |
| Phase oversampling | 0 %               |
| Slice oversampling | 0.0 %             |
| Slices per slab    | 176               |
| FoV read           | 256 mm            |
| FoV phase          | 100.0 %           |
| Slice thickness    | 1.00 mm           |
| TR                 | 2200 ms           |
| TE                 | 3.44 ms           |
| Averages           | 1                 |
| Concatenations     | 1                 |
| Filter             | Prescan Normalize |
| Coil elements      | HEA;HEP           |

## Contrast

|                   |               |
|-------------------|---------------|
| Magn. preparation | Slice-sel. IR |
| T1                | 900 ms        |
| Flip angle        | 10 deg        |
| Fat suppr.        | None          |
| Water suppr.      | None          |
| Averaging mode    | Long term     |
| Reconstruction    | Magnitude     |
| Measurements      | 1             |
| Multiple series   | Off           |

## Resolution

|                       |            |
|-----------------------|------------|
| Base resolution       | 256        |
| Phase resolution      | 100 %      |
| Slice resolution      | 100 %      |
| Phase partial Fourier | Off        |
| Slice partial Fourier | Off        |
| Interpolation         | Off        |
| PAT mode              | GRAPPA     |
| Accel. factor PE      | 2          |
| Ref. lines PE         | 40         |
| Accel. factor 3D      | 1          |
| Matrix Coil Mode      | Triple     |
| Reference scan mode   | Integrated |
| Image Filter          | Off        |
| Distortion Corr.      | Off        |

|                   |     |
|-------------------|-----|
| Unfiltered images | Off |
| Prescan Normalize | On  |
| Normalize         | Off |
| B1 filter         | Off |
| Raw filter        | Off |
| Elliptical filter | Off |

## Geometry

|                  |             |
|------------------|-------------|
| Multi-slice mode | Single shot |
| Series           | Interleaved |
| Table position   | H           |
| Table position   | 0 mm        |
| Inline Composing | Off         |

## System

|                          |                  |
|--------------------------|------------------|
| Body                     | Off              |
| HEP                      | On               |
| HEA                      | On               |
| SP4                      | Off              |
| SP2                      | Off              |
| SP8                      | Off              |
| SP6                      | Off              |
| SP3                      | Off              |
| SP1                      | Off              |
| SP7                      | Off              |
| SP5                      | Off              |
| Positioning mode         | REF              |
| MSMA                     | S - C - T        |
| Sagittal                 | R >> L           |
| Coronal                  | P >> A           |
| Transversal              | H >> F           |
| Save uncombined          | Off              |
| Coil Combine Mode        | Sum of Squares   |
| AutoAlign                | ---              |
| Auto Coil Select         | Default          |
| Shim mode                | Standard         |
| Adjust with body coil    | Off              |
| Confirm freq. adjustment | Off              |
| Assume Silicone          | Off              |
| ? Ref. amplitude 1H      | 0.000 V          |
| Adjustment Tolerance     | Auto             |
| Adjust volume            |                  |
| Position                 | L7.8 A43.1 H23.3 |
| Orientation              | T > C3.5 > S3.4  |
| Rotation                 | 88.30 deg        |
| A >> P                   | 256 mm           |
| R >> L                   | 256 mm           |
| F >> H                   | 176 mm           |

## Physio

|                 |      |
|-----------------|------|
| 1st Signal/Mode | None |
| Dark blood      | Off  |
| Resp. control   | Off  |

## Inline

|              |     |
|--------------|-----|
| Subtract     | Off |
| Std-Dev-Sag  | Off |
| Std-Dev-Cor  | Off |
| Std-Dev-Tra  | Off |
| Std-Dev-Time | Off |
| MIP-Sag      | Off |
| MIP-Cor      | Off |
| MIP-Tra      | Off |

## SIEMENS MAGNETOM Verio syngo MR B17

|                      |     |
|----------------------|-----|
| MIP-Time             | Off |
| Save original images | On  |

---

## Sequence

|                     |           |
|---------------------|-----------|
| Introduction        | On        |
| Dimension           | 3D        |
| Elliptical scanning | Off       |
| Asymmetric echo     | Allowed   |
| Bandwidth           | 130 Hz/Px |
| Flow comp.          | No        |
| Echo spacing        | 8.7 ms    |

---

|               |           |
|---------------|-----------|
| RF pulse type | Fast      |
| Gradient mode | Fast      |
| Excitation    | Slab-sel. |
| RF spoiling   | On        |

## SIEMENS MAGNETOM Verio syngo MR B17

\USER\DAVIS\_RESEARCH\Sicotte\MS\DTI 30dir (0 1000) a-p

TA: 7:59 PAT: 2 Voxel size: 1.7x1.7x2.0 mm Rel. SNR: 1.00 SIEMENS: ep2d\_diff

## Properties

|                                               |        |
|-----------------------------------------------|--------|
| Prio Recon                                    | Off    |
| Before measurement                            |        |
| After measurement                             |        |
| Load to viewer                                | On     |
| Inline movie                                  | Off    |
| Auto store images                             | On     |
| Load to stamp segments                        | Off    |
| Load images to graphic segments               | Off    |
| Auto open inline display                      | Off    |
| Start measurement without further preparation | On     |
| Wait for user to start                        | On     |
| Start measurements                            | single |

## Routine

|                    |                 |
|--------------------|-----------------|
| Slice group 1      |                 |
| Slices             | 75              |
| Dist. factor       | 0 %             |
| Position           | L3.0 A9.5 H28.1 |
| Orientation        | Transversal     |
| Phase enc. dir.    | A >> P          |
| Rotation           | 0.00 deg        |
| Phase oversampling | 0 %             |
| FoV read           | 267 mm          |
| FoV phase          | 100.0 %         |
| Slice thickness    | 2.0 mm          |
| TR                 | 14100 ms        |
| TE                 | 101 ms          |
| Averages           | 1               |
| Concatenations     | 1               |
| Filter             | Raw filter      |
| Coil elements      | HEA;HEP         |

## Contrast

|                   |           |
|-------------------|-----------|
| MTC               | Off       |
| Magn. preparation | None      |
| Fat suppr.        | Fat sat.  |
| Averaging mode    | Long term |
| Reconstruction    | Magnitude |
| Delay in TR       | 0 ms      |
| Multiple series   | Off       |

## Resolution

|                       |               |
|-----------------------|---------------|
| Base resolution       | 160           |
| Phase resolution      | 100 %         |
| Phase partial Fourier | 6/8           |
| Interpolation         | Off           |
| PAT mode              | GRAPPA        |
| Accel. factor PE      | 2             |
| Ref. lines PE         | 36            |
| Matrix Coil Mode      | Auto (Triple) |
| Reference scan mode   | Separate      |
| Distortion Corr.      | Off           |
| Prescan Normalize     | Off           |
| Raw filter            | On            |
| Intensity             | Weak          |
| Slope                 | 25            |
| Elliptical filter     | Off           |
| Hamming               | Off           |

## Geometry

|                  |             |
|------------------|-------------|
| Multi-slice mode | Interleaved |
|------------------|-------------|

## Series

|                  |      |
|------------------|------|
| Special sat.     | None |
| Table position   | H    |
| Table position   | 0 mm |
| Inline Composing | Off  |

## System

|      |     |
|------|-----|
| Body | Off |
| HEP  | On  |
| HEA  | On  |
| SP4  | Off |
| SP2  | Off |
| SP8  | Off |
| SP6  | Off |
| SP3  | Off |
| SP1  | Off |
| SP7  | Off |
| SP5  | Off |

|                   |                |
|-------------------|----------------|
| Positioning mode  | REF            |
| MSMA              | S - C - T      |
| Sagittal          | R >> L         |
| Coronal           | A >> P         |
| Transversal       | F >> H         |
| Coil Combine Mode | Sum of Squares |
| AutoAlign         | ---            |
| Auto Coil Select  | Default        |

|                          |                 |
|--------------------------|-----------------|
| Shim mode                | Standard        |
| Adjust with body coil    | Off             |
| Confirm freq. adjustment | Off             |
| Assume Silicone          | Off             |
| ? Ref. amplitude 1H      | 0.000 V         |
| Adjustment Tolerance     | Auto            |
| Adjust volume            |                 |
| Position                 | L3.0 A9.5 H28.1 |
| Orientation              | Transversal     |
| Rotation                 | 0.00 deg        |
| R >> L                   | 267 mm          |
| A >> P                   | 267 mm          |
| F >> H                   | 150 mm          |

## Physio

|                 |      |
|-----------------|------|
| 1st Signal/Mode | None |
| Resp. control   | Off  |

## Diff

|                       |                        |
|-----------------------|------------------------|
| Diffusion mode        | MDDW                   |
| Diff. weightings      | 2                      |
| b-value 1             | 0 s/mm <sup>2</sup>    |
| b-value 2             | 1000 s/mm <sup>2</sup> |
| Diff. weighted images | On                     |
| Trace weighted images | On                     |
| Average ADC maps      | On                     |
| Individual ADC maps   | Off                    |
| FA maps               | On                     |
| Mosaic                | Off                    |
| Tensor                | Off                    |
| Noise level           | 40                     |
| Diff. directions      | 30                     |

## Sequence

|              |            |
|--------------|------------|
| Introduction | Off        |
| Bandwidth    | 1562 Hz/Px |

## SIEMENS MAGNETOM Verio syngo MR B17

|                   |         |
|-------------------|---------|
| Free echo spacing | Off     |
| Echo spacing      | 0.95 ms |
| -----             |         |
| EPI factor        | 160     |
| RF pulse type     | Normal  |
| Gradient mode     | Fast*   |

## SIEMENS MAGNETOM Verio syngo MR B17

\\USER\DAVIS\_RESEARCH\Sicotte\MS\3D\_Ax\_T2\_spc

TA: 9:03 PAT: Off Voxel size: 1.0x1.0x1.0 mm Rel. SNR: 1.00 SIEMENS: tse\_vfl

## Properties

|                                               |        |
|-----------------------------------------------|--------|
| Prio Recon                                    | Off    |
| Before measurement                            |        |
| After measurement                             |        |
| Load to viewer                                | On     |
| Inline movie                                  | Off    |
| Auto store images                             | On     |
| Load to stamp segments                        | Off    |
| Load images to graphic segments               | Off    |
| Auto open inline display                      | Off    |
| Start measurement without further preparation | On     |
| Wait for user to start                        | Off    |
| Start measurements                            | single |

## Routine

|                    |                               |
|--------------------|-------------------------------|
| Slab group 1       |                               |
| Slabs              | 1                             |
| Position           | R5.0 P5.5 F21.9               |
| Orientation        | T > S2.0 > C-0.2              |
| Phase enc. dir.    | R >> L                        |
| Rotation           | 90.00 deg                     |
| Phase oversampling | 0 %                           |
| Slice oversampling | 10.0 %                        |
| Slices per slab    | 160                           |
| FoV read           | 200 mm                        |
| FoV phase          | 80.2 %                        |
| Slice thickness    | 1.00 mm                       |
| TR                 | 1100 ms                       |
| TE                 | 132 ms                        |
| Averages           | 1.4                           |
| Concatenations     | 1                             |
| Filter             | Raw filter, Prescan Normalize |
| Coil elements      | HEA;HEP                       |

## Contrast

|                   |                  |
|-------------------|------------------|
| MTC               | Off              |
| Magn. preparation | None             |
| Flip angle        | 120 deg          |
| Fat suppr.        | None             |
| Water suppr.      | None             |
| Restore magn.     | On               |
| Reconstruction    | Magnitude        |
| Measurements      | 1                |
| Multiple series   | Each measurement |

## Resolution

|                       |           |
|-----------------------|-----------|
| Base resolution       | 192       |
| Phase resolution      | 100 %     |
| Slice resolution      | 50 %      |
| Phase partial Fourier | Allowed   |
| Slice partial Fourier | Off       |
| Interpolation         | Off       |
| PAT mode              | None      |
| Matrix Coil Mode      | Auto (CP) |
| Image Filter          | Off       |
| Distortion Corr.      | Off       |
| Unfiltered images     | Off       |
| Prescan Normalize     | On        |
| Normalize             | Off       |
| B1 filter             | Off       |
| Raw filter            | On        |

|                   |      |
|-------------------|------|
| Intensity         | Weak |
| Slope             | 25   |
| Elliptical filter | Off  |

## Geometry

|                  |      |
|------------------|------|
| Special sat.     | None |
| Table position   | H    |
| Table position   | 0 mm |
| Inline Composing | Off  |

## System

|                          |                  |
|--------------------------|------------------|
| Body                     | Off              |
| HEP                      | On               |
| HEA                      | On               |
| SP4                      | Off              |
| SP2                      | Off              |
| SP8                      | Off              |
| SP6                      | Off              |
| SP3                      | Off              |
| SP1                      | Off              |
| SP7                      | Off              |
| SP5                      | Off              |
| Positioning mode         | REF              |
| MSMA                     | S - C - T        |
| Sagittal                 | L >> R           |
| Coronal                  | A >> P           |
| Transversal              | F >> H           |
| Save uncombined          | Off              |
| Coil Combine Mode        | Adaptive Combine |
| AutoAlign                | ---              |
| Auto Coil Select         | Default          |
| Shim mode                | Tune up          |
| Adjust with body coil    | Off              |
| Confirm freq. adjustment | Off              |
| Assume Silicone          | Off              |
| ? Ref. amplitude 1H      | 0.000 V          |
| Adjustment Tolerance     | Auto             |
| Adjust volume            |                  |
| Position                 | Isocenter        |
| Orientation              | Transversal      |
| Rotation                 | 0.00 deg         |
| R >> L                   | 350 mm           |
| A >> P                   | 263 mm           |
| F >> H                   | 350 mm           |

## Physio

|                 |      |
|-----------------|------|
| 1st Signal/Mode | None |
| Dark blood      | Off  |
| Resp. control   | Off  |

## Inline

|                      |     |
|----------------------|-----|
| Subtract             | Off |
| Std-Dev-Sag          | Off |
| Std-Dev-Cor          | Off |
| Std-Dev-Tra          | Off |
| Std-Dev-Time         | Off |
| MIP-Sag              | Off |
| MIP-Cor              | Off |
| MIP-Tra              | Off |
| MIP-Time             | Off |
| Save original images | On  |

## SIEMENS MAGNETOM Verio syngo MR B17

## Sequence

|                       |             |
|-----------------------|-------------|
| Introduction          | On          |
| Dimension             | 3D          |
| Bandwidth             | 286 Hz/Px   |
| Flow comp.            | No          |
| Allowed delay         | 30 s        |
| Echo spacing          | 5.88 ms     |
| Adiabatic-mode        | Off         |
| -----                 |             |
| Define                | Echo trains |
| Turbo factor          | 39          |
| Slice turbo factor    | 1           |
| Echo trains per slice | 4           |
| Echo train duration   | 241         |
| RF pulse type         | Normal      |
| Gradient mode         | Normal      |
| Excitation            | Slab-sel.   |
| Flip angle mode       | Constant    |

## SIEMENS MAGNETOM Verio syngo MR B17

\USER\DAVIS\_RESEARCH\Sicotte\MS\Pd\_T2\_tse\_tra

TA: 3:45 PAT: Off Voxel size: 0.7x0.7x3.0 mm Rel. SNR: 1.00 SIEMENS: tse

## Properties

|                                               |        |
|-----------------------------------------------|--------|
| Prio Recon                                    | Off    |
| Before measurement                            |        |
| After measurement                             |        |
| Load to viewer                                | On     |
| Inline movie                                  | Off    |
| Auto store images                             | On     |
| Load to stamp segments                        | Off    |
| Load images to graphic segments               | Off    |
| Auto open inline display                      | Off    |
| Start measurement without further preparation | On     |
| Wait for user to start                        | Off    |
| Start measurements                            | single |

## Routine

|                    |                                      |
|--------------------|--------------------------------------|
| Slice group 1      |                                      |
| Slices             | 35                                   |
| Dist. factor       | 30 %                                 |
| Position           | Isocenter                            |
| Orientation        | Transversal                          |
| Phase enc. dir.    | R >> L                               |
| Rotation           | 90.00 deg                            |
| Phase oversampling | 0 %                                  |
| FoV read           | 220 mm                               |
| FoV phase          | 100.0 %                              |
| Slice thickness    | 3.0 mm                               |
| TR                 | 3440 ms                              |
| TE 1               | 18.0 ms                              |
| TE 2               | 82 ms                                |
| Averages           | 1                                    |
| Concatenations     | 1                                    |
| Filter             | Prescan Normalize, Elliptical filter |
| Coil elements      | HEA;HEP                              |

## Contrast

|                   |                  |
|-------------------|------------------|
| MTC               | Off              |
| Magn. preparation | None             |
| Flip angle        | 150 deg          |
| Fat suppr.        | None             |
| Water suppr.      | None             |
| Restore magn.     | Off              |
| Averaging mode    | Long term        |
| Reconstruction    | Magnitude        |
| Measurements      | 1                |
| Multiple series   | Each measurement |

## Resolution

|                       |           |
|-----------------------|-----------|
| Base resolution       | 320       |
| Phase resolution      | 100 %     |
| Phase partial Fourier | Off       |
| Trajectory            | Cartesian |
| Interpolation         | On        |
| PAT mode              | None      |
| Matrix Coil Mode      | Auto (CP) |
| Image Filter          | Off       |
| Distortion Corr.      | Off       |
| Unfiltered images     | Off       |
| Prescan Normalize     | On        |
| Normalize             | Off       |
| B1 filter             | Off       |

|                   |         |
|-------------------|---------|
| Raw filter        | Off     |
| Elliptical filter | On      |
| Mode              | Inplane |

## Geometry

|                  |             |
|------------------|-------------|
| Multi-slice mode | Interleaved |
| Series           | Interleaved |
| Special sat.     | None        |
| Table position   | H           |
| Table position   | 0 mm        |
| Inline Composing | Off         |
| Tim CT mode      | Off         |

## System

|                          |                  |
|--------------------------|------------------|
| Body                     | Off              |
| NE2                      | Off              |
| HEP                      | On               |
| HEA                      | On               |
| SP4                      | Off              |
| SP2                      | Off              |
| SP8                      | Off              |
| SP6                      | Off              |
| SP3                      | Off              |
| SP1                      | Off              |
| SP7                      | Off              |
| SP5                      | Off              |
| Positioning mode         | REF              |
| MSMA                     | S - C - T        |
| Sagittal                 | R >> L           |
| Coronal                  | A >> P           |
| Transversal              | F >> H           |
| Save uncombined          | Off              |
| Coil Combine Mode        | Adaptive Combine |
| AutoAlign                | ---              |
| Auto Coil Select         | Default          |
| Shim mode                | Tune up          |
| Adjust with body coil    | Off              |
| Confirm freq. adjustment | Off              |
| Assume Silicone          | Off              |
| ? Ref. amplitude 1H      | 0.000 V          |
| Adjustment Tolerance     | Auto             |
| Adjust volume            |                  |
| Position                 | Isocenter        |
| Orientation              | Transversal      |
| Rotation                 | 0.00 deg         |
| R >> L                   | 350 mm           |
| A >> P                   | 263 mm           |
| F >> H                   | 350 mm           |

## Physio

|                 |      |
|-----------------|------|
| 1st Signal/Mode | None |
| Dark blood      | Off  |
| Resp. control   | Off  |

## Inline

|              |     |
|--------------|-----|
| Subtract     | Off |
| Std-Dev-Sag  | Off |
| Std-Dev-Cor  | Off |
| Std-Dev-Tra  | Off |
| Std-Dev-Time | Off |
| MIP-Sag      | Off |

## SIEMENS MAGNETOM Verio syngo MR B17

|                      |     |
|----------------------|-----|
| MIP-Cor              | Off |
| MIP-Tra              | Off |
| MIP-Time             | Off |
| Save original images | On  |

---

## Sequence

|                     |           |
|---------------------|-----------|
| Introduction        | On        |
| Dimension           | 2D        |
| Compensate T2 decay | Off       |
| Reduce Motion Sens. | On        |
| Contrasts           | 2         |
| Bandwidth           | 252 Hz/Px |
| Flow comp.          | No        |
| Allowed delay       | 60 s      |
| Echo spacing        | 9.06 ms   |

---

|                       |              |
|-----------------------|--------------|
| Define                | Turbo factor |
| Turbo factor          | 5            |
| Echo trains per slice | 64           |
| RF pulse type         | Normal       |
| Gradient mode         | Fast         |

## SIEMENS MAGNETOM Verio syngo MR B17

\\USER\DAVIS\_RESEARCH\Sicotte\MS\AX T2 SWI f13d

TA: 7:50 PAT: 2 Voxel size: 0.9x0.9x0.9 mm Rel. SNR: 1.00 SIEMENS: gre

## Properties

|                                               |        |
|-----------------------------------------------|--------|
| Prio Recon                                    | Off    |
| Before measurement                            |        |
| After measurement                             |        |
| Load to viewer                                | On     |
| Inline movie                                  | Off    |
| Auto store images                             | On     |
| Load to stamp segments                        | Off    |
| Load images to graphic segments               | Off    |
| Auto open inline display                      | Off    |
| Start measurement without further preparation | On     |
| Wait for user to start                        | Off    |
| Start measurements                            | single |

## Routine

|                    |                   |
|--------------------|-------------------|
| Slab group 1       |                   |
| Slabs              | 1                 |
| Dist. factor       | 20 %              |
| Position           | L0.3 P1.6 H34.7   |
| Orientation        | T > C-15.6        |
| Phase enc. dir.    | R >> L            |
| Rotation           | 90.00 deg         |
| Phase oversampling | 0 %               |
| Slice oversampling | 22.2 %            |
| Slices per slab    | 144               |
| FoV read           | 230 mm            |
| FoV phase          | 78.1 %            |
| Slice thickness    | 0.90 mm           |
| TR                 | 24 ms             |
| TE                 | 20.00 ms          |
| Averages           | 1                 |
| Concatenations     | 1                 |
| Filter             | Prescan Normalize |
| Coil elements      | HEA;HEP;NE1,2     |

## Contrast

|                   |                  |
|-------------------|------------------|
| MTC               | Off              |
| Magn. preparation | None             |
| Flip angle        | 15 deg           |
| Fat suppr.        | None             |
| Water suppr.      | None             |
| SWI               | On               |
| Averaging mode    | Short term       |
| Reconstruction    | Magnitude        |
| Measurements      | 1                |
| Multiple series   | Each measurement |

## Resolution

|                       |               |
|-----------------------|---------------|
| Base resolution       | 256           |
| Phase resolution      | 100 %         |
| Slice resolution      | 100 %         |
| Phase partial Fourier | Off           |
| Slice partial Fourier | Off           |
| Interpolation         | Off           |
| PAT mode              | GRAPPA        |
| Accel. factor PE      | 2             |
| Ref. lines PE         | 24            |
| Accel. factor 3D      | 1             |
| Matrix Coil Mode      | Auto (Triple) |
| Reference scan mode   | Integrated    |
| Image Filter          | Off           |

|                   |     |
|-------------------|-----|
| Distortion Corr.  | Off |
| Unfiltered images | Off |
| Prescan Normalize | On  |
| Normalize         | Off |
| B1 filter         | Off |
| Raw filter        | Off |
| Elliptical filter | Off |

## Geometry

|                  |             |
|------------------|-------------|
| Multi-slice mode | Interleaved |
| Series           | Interleaved |
| Saturation mode  | Standard    |
| Special sat.     | None        |
| Table position   | H           |
| Table position   | 0 mm        |
| Inline Composing | Off         |
| Tim CT mode      | Off         |

## System

|                          |                  |
|--------------------------|------------------|
| Body                     | Off              |
| NE2                      | On               |
| NE1                      | On               |
| HEP                      | On               |
| HEA                      | On               |
| SP4                      | Off              |
| SP2                      | Off              |
| SP8                      | Off              |
| SP6                      | Off              |
| SP3                      | Off              |
| SP1                      | Off              |
| SP7                      | Off              |
| SP5                      | Off              |
| Positioning mode         | FIX              |
| MSMA                     | S - C - T        |
| Sagittal                 | L >> R           |
| Coronal                  | A >> P           |
| Transversal              | F >> H           |
| Save uncombined          | Off              |
| Coil Combine Mode        | Adaptive Combine |
| AutoAlign                | ---              |
| Auto Coil Select         | Default          |
| Shim mode                | Standard         |
| Adjust with body coil    | Off              |
| Confirm freq. adjustment | Off              |
| Assume Silicone          | Off              |
| ? Ref. amplitude 1H      | 0.000 V          |
| Adjustment Tolerance     | Auto             |
| Adjust volume            |                  |
| Position                 | L0.3 P1.6 H34.7  |
| Orientation              | T > C-15.6       |
| Rotation                 | 90.00 deg        |
| A >> P                   | 230 mm           |
| R >> L                   | 180 mm           |
| F >> H                   | 130 mm           |

## Physio

|                 |      |
|-----------------|------|
| 1st Signal/Mode | None |
| Segments        | 1    |
| Tagging         | None |
| Dark blood      | Off  |
| Resp. control   | Off  |

## SIEMENS MAGNETOM Verio syngo MR B17

## Inline

|                      |      |
|----------------------|------|
| Subtract             | Off  |
| Liver registration   | Off  |
| Std-Dev-Sag          | Off  |
| Std-Dev-Cor          | Off  |
| Std-Dev-Tra          | Off  |
| Std-Dev-Time         | Off  |
| MIP-Sag              | Off  |
| MIP-Cor              | Off  |
| MIP-Tra              | Off  |
| MIP-Time             | Off  |
| Save original images | On   |
| -----                |      |
| Wash - In            | Off  |
| Wash - Out           | Off  |
| TTP                  | Off  |
| PEI                  | Off  |
| MIP - time           | Off  |
| -----                |      |
| MapIt                | None |
| Contrasts            | 1    |

## Sequence

|                     |           |
|---------------------|-----------|
| Introduction        | On        |
| Dimension           | 3D        |
| Elliptical scanning | Off       |
| Phase stabilisation | Off       |
| Asymmetric echo     | Off       |
| Bandwidth           | 330 Hz/Px |
| Flow comp.          | Yes       |
| Allowed delay       | 0 s       |
| -----               |           |
| RF pulse type       | Fast      |
| Gradient mode       | Normal    |
| Excitation          | Slab-sel. |
| RF spoiling         | On        |

## SIEMENS MAGNETOM Verio syngo MR B17

\\USER\DAVIS\_RESEARCH\Sicotte\MS\gre\_field\_mapping

TA: 1:30

Voxel size: 3.0x3.0x3.0 mm

Rel. SNR: 1.00

SIEMENS: gre\_field\_mapping

## Properties

|                                               |        |
|-----------------------------------------------|--------|
| Prio Recon                                    | Off    |
| Before measurement                            |        |
| After measurement                             |        |
| Load to viewer                                | On     |
| Inline movie                                  | Off    |
| Auto store images                             | On     |
| Load to stamp segments                        | Off    |
| Load images to graphic segments               | Off    |
| Auto open inline display                      | Off    |
| Start measurement without further preparation | On     |
| Wait for user to start                        | Off    |
| Start measurements                            | single |

## Routine

|                    |                 |
|--------------------|-----------------|
| Slice group 1      |                 |
| Slices             | 54              |
| Dist. factor       | 0 %             |
| Position           | R5.5 P2.4 F17.2 |
| Orientation        | Transversal     |
| Phase enc. dir.    | A >> P          |
| Rotation           | 0.00 deg        |
| Phase oversampling | 0 %             |
| FoV read           | 230 mm          |
| FoV phase          | 100.0 %         |
| Slice thickness    | 3.0 mm          |
| TR                 | 573 ms          |
| TE 1               | 4.92 ms         |
| TE 2               | 7.38 ms         |
| Averages           | 1               |
| Concatenations     | 1               |
| Filter             | None            |
| Coil elements      | HEA;HEP         |

## Contrast

|                 |           |
|-----------------|-----------|
| MTC             | Off       |
| Flip angle      | 60 deg    |
| Fat suppr.      | None      |
| Averaging mode  | Long term |
| Reconstruction  | Phase     |
| Measurements    | 1         |
| Multiple series | Off       |

## Resolution

|                       |           |
|-----------------------|-----------|
| Base resolution       | 76        |
| Phase resolution      | 100 %     |
| Phase partial Fourier | Off       |
| Interpolation         | Off       |
| Matrix Coil Mode      | Auto (CP) |
| Image Filter          | Off       |
| Distortion Corr.      | Off       |
| Prescan Normalize     | Off       |
| Normalize             | Off       |
| B1 filter             | Off       |
| Raw filter            | Off       |
| Elliptical filter     | Off       |

## Geometry

|                  |             |
|------------------|-------------|
| Multi-slice mode | Interleaved |
| Series           | Interleaved |
| Special sat.     | None        |

|                  |      |
|------------------|------|
| Table position   | H    |
| Table position   | 0 mm |
| Inline Composing | Off  |

## System

|      |     |
|------|-----|
| Body | Off |
| HEP  | On  |
| HEA  | On  |
| SP4  | Off |
| SP2  | Off |
| SP8  | Off |
| SP6  | Off |
| SP3  | Off |
| SP1  | Off |
| SP7  | Off |
| SP5  | Off |

|                   |                |
|-------------------|----------------|
| Positioning mode  | REF            |
| MSMA              | S - C - T      |
| Sagittal          | R >> L         |
| Coronal           | P >> A         |
| Transversal       | F >> H         |
| Save uncombined   | Off            |
| Coil Combine Mode | Sum of Squares |
| AutoAlign         | ---            |
| Auto Coil Select  | Default        |

|                          |                 |
|--------------------------|-----------------|
| Shim mode                | Standard        |
| Adjust with body coil    | Off             |
| Confirm freq. adjustment | Off             |
| Assume Silicone          | Off             |
| ? Ref. amplitude 1H      | 0.000 V         |
| Adjustment Tolerance     | Auto            |
| Adjust volume            |                 |
| Position                 | R5.5 P2.4 F17.2 |
| Orientation              | Transversal     |
| Rotation                 | 0.00 deg        |
| R >> L                   | 230 mm          |
| A >> P                   | 230 mm          |
| F >> H                   | 162 mm          |

## Composing

## Sequence

|                 |           |
|-----------------|-----------|
| Introduction    | On        |
| Dimension       | 2D        |
| Asymmetric echo | Off       |
| Contrasts       | 2         |
| Bandwidth       | 260 Hz/Px |
| Flow comp.      | Yes       |
| RF pulse type   | Normal    |
| Gradient mode   | Normal    |
| RF spoiling     | On        |

## SIEMENS MAGNETOM Verio syngo MR B17

\USER\DAVIS\_RESEARCH\Sicotte\MS\Ax\_fmRI\_18s\_5rep\_RESTING

TA: 8:12 PAT: 3 Voxel size: 2.5x2.5x3.0 mm Rel. SNR: 1.00 SIEMENS: ep2d\_pace

## Properties

|                                               |        |
|-----------------------------------------------|--------|
| Prio Recon                                    | Off    |
| Before measurement                            |        |
| After measurement                             |        |
| Load to viewer                                | On     |
| Inline movie                                  | Off    |
| Auto store images                             | On     |
| Load to stamp segments                        | Off    |
| Load images to graphic segments               | Off    |
| Auto open inline display                      | Off    |
| Start measurement without further preparation | On     |
| Wait for user to start                        | On     |
| Start measurements                            | single |

## Routine

|                    |                 |
|--------------------|-----------------|
| Slice group 1      |                 |
| Slices             | 36              |
| Dist. factor       | 20 %            |
| Position           | R5.5 P2.4 F17.2 |
| Orientation        | Transversal     |
| Phase enc. dir.    | A >> P          |
| Rotation           | 0.00 deg        |
| Phase oversampling | 0 %             |
| FoV read           | 230 mm          |
| FoV phase          | 100.0 %         |
| Slice thickness    | 3.0 mm          |
| TR                 | 2000 ms         |
| TE                 | 27 ms           |
| Averages           | 1               |
| Concatenations     | 1               |
| Filter             | None            |
| Coil elements      | HEA;HEP         |

## Contrast

|                 |           |
|-----------------|-----------|
| MTC             | Off       |
| Flip angle      | 90 deg    |
| Fat suppr.      | Fat sat.  |
| -----           |           |
| Averaging mode  | Long term |
| Reconstruction  | Magnitude |
| Measurements    | 240       |
| Delay in TR     | 0 ms      |
| Multiple series | Off       |

## Resolution

|                       |          |
|-----------------------|----------|
| Base resolution       | 92       |
| Phase resolution      | 100 %    |
| Phase partial Fourier | Off      |
| Interpolation         | Off      |
| -----                 |          |
| PAT mode              | GRAPPA   |
| Accel. factor PE      | 3        |
| Ref. lines PE         | 36       |
| Matrix Coil Mode      | Triple   |
| Reference scan mode   | Separate |
| -----                 |          |
| Distortion Corr.      | Off      |
| Prescan Normalize     | Off      |
| Raw filter            | On       |
| Elliptical filter     | Off      |
| Hamming               | Off      |

## Geometry

|                  |             |
|------------------|-------------|
| Multi-slice mode | Interleaved |
| Series           | Interleaved |

Special sat. None

|                  |      |
|------------------|------|
| Table position   | H    |
| Table position   | 0 mm |
| Inline Composing | Off  |

## System

|      |     |
|------|-----|
| Body | Off |
| HEP  | On  |
| HEA  | On  |
| SP4  | Off |
| SP2  | Off |
| SP8  | Off |
| SP6  | Off |
| SP3  | Off |
| SP1  | Off |
| SP7  | Off |
| SP5  | Off |

|                   |                |
|-------------------|----------------|
| Positioning mode  | REF            |
| MSMA              | S - C - T      |
| Sagittal          | R >> L         |
| Coronal           | P >> A         |
| Transversal       | F >> H         |
| Coil Combine Mode | Sum of Squares |
| AutoAlign         | ---            |
| Auto Coil Select  | Default        |

|                          |                 |
|--------------------------|-----------------|
| Shim mode                | Standard        |
| Adjust with body coil    | Off             |
| Confirm freq. adjustment | Off             |
| Assume Silicone          | Off             |
| ? Ref. amplitude 1H      | 0.000 V         |
| Adjustment Tolerance     | Auto            |
| Adjust volume            |                 |
| Position                 | R5.5 P2.4 F17.2 |
| Orientation              | Transversal     |
| Rotation                 | 0.00 deg        |
| R >> L                   | 230 mm          |
| A >> P                   | 230 mm          |
| F >> H                   | 129 mm          |

## Physio

|                 |      |
|-----------------|------|
| 1st Signal/Mode | None |
|-----------------|------|

## BOLD

|                         |            |
|-------------------------|------------|
| GLM Statistics          | On         |
| Dynamic t-maps          | On         |
| Starting ignore meas    | 0          |
| Ignore after transition | 0          |
| Model transition states | On         |
| Temp. highpass filter   | On         |
| Threshold               | 4.00       |
| Paradigm size           | 10         |
| Meas[1]                 | Baseline   |
| Meas[2]                 | Baseline   |
| Meas[3]                 | Baseline   |
| Meas[4]                 | Baseline   |
| Meas[5]                 | Baseline   |
| Meas[6]                 | Baseline   |
| Meas[7]                 | Active     |
| Meas[8]                 | Active     |
| Meas[9]                 | Active     |
| Meas[10]                | Active     |
| Motion correction       | On         |
| Interpolation           | 3D-K-space |

SIEMENS MAGNETOM Verio syngo MR B17

Spatial filter                      Off

Sequence

|                   |            |
|-------------------|------------|
| Introduction      | On         |
| Bandwidth         | 2264 Hz/Px |
| Free echo spacing | Off        |
| Echo spacing      | 0.64 ms    |
| -----             |            |
| EPI factor        | 92         |
| RF pulse type     | Normal     |
| Gradient mode     | Fast*      |

## SIEMENS MAGNETOM Verio syngo MR B17

## Table of contents

|        |                |         |    |                          |
|--------|----------------|---------|----|--------------------------|
| \\USER | DAVIS_RESEARCH | Sicotte | MS | localizer                |
|        |                |         |    | MPRAGE Axial             |
|        |                |         |    | DTI 30dir (0 1000) a-p   |
|        |                |         |    | 3D_Ax_T2_spc             |
|        |                |         |    | Pd_T2_tse_tra            |
|        |                |         |    | AX T2 SWI fl3d           |
|        |                |         |    | gre_field_mapping        |
|        |                |         |    | Ax_fMRI_18s_5rep_RESTING |

## Resolution

|                       |            |
|-----------------------|------------|
| Base resolution       | 160        |
| Phase resolution      | 100 %      |
| Phase partial Fourier | 6/8        |
| PAT mode              | GRAPPA     |
| Accel. factor PE      | 3          |
| Ref. lines PE         | 24         |
| Reference scan mode   | Integrated |
| Image Filter          | Off        |
| Distortion Corr.      | Off        |
| Accel. factor 3D      | 1          |
| Unfiltered images     | Off        |
| Prescan Normalize     | On         |
| Normalize             | Off        |
| B1 filter             | Off        |
| Raw filter            | Off        |
| Elliptical filter     | Off        |
| Slice resolution      | 69 %       |
| Slice partial Fourier | 6/8        |

## Geometry

|                     |            |
|---------------------|------------|
| Nr. of slab groups  | 1          |
| Slabs               | 1          |
| Dist. factor        | 20 %       |
| Position            | Isocenter  |
| Phase enc. dir.     | A >> P     |
| Phase oversampling  | 0 %        |
| Slice oversampling  | 0.0 %      |
| Slices per slab     | 128        |
| Multi-slice mode    | Sequential |
| Series              | Ascending  |
| Nr. of sat. regions | 0          |
| Position mode       | L-P-H      |
| Special sat.        | None       |
| Table position      | P          |

**System**

|                          |                      |
|--------------------------|----------------------|
| Body                     | Off                  |
| HEP                      | On                   |
| HEA                      | On                   |
| Position mode            | L-P-H                |
| Positioning mode         | REF                  |
| Table position           | H                    |
| Table position           | 0 mm                 |
| MSMA                     | S - C - T            |
| Sagittal                 | R >> L               |
| Coronal                  | A >> P               |
| Transversal              | F >> H               |
| Save uncombined          | Off                  |
| Coil Combine Mode        | Adaptive Combine     |
| Coil Select Mode         | Off - AutoCoilSelect |
| Shim mode                | Tune up              |
| Adjust with body coil    | Off                  |
| Confirm freq. adjustment | Off                  |
| Assume Dominant Fat      | Off                  |
| Assume Silicone          | Off                  |
| Adjustment Tolerance     | Auto                 |
| ? Ref. amplitude 1H      | 0.000 V              |
| Position                 | Isocenter            |
| Rotation                 | 0.00 deg             |
| R >> L                   | 350 mm               |
| A >> P                   | 263 mm               |
| F >> H                   | 350 mm               |
| Frequency 1H             | 123.135762 MHz       |
| Correction factor        | 1                    |
| SRFExcit 1H              | 63.704 V             |
| Gain                     | Low                  |
| Table position           | 0 mm                 |
| Img. Scale. Cor.         | 1.000                |

**Physio****Inline**

|                       |     |
|-----------------------|-----|
| Distortion correction | Off |
|-----------------------|-----|

## Sequence

|                       |            |
|-----------------------|------------|
| Introduction          | On         |
| Dimension             | 3D         |
| Averaging mode        | Short term |
| Multi-slice mode      | Sequential |
| Asymmetric echo       | Weak       |
| Contrasts             | 1          |
| Bandwidth             | 540 Hz/Px  |
| RF pulse type         | Fast       |
| Gradient mode         | Normal     |
| Excitation            | Non-sel.   |
| RF spoiling           | On         |
| TX/RX delta frequency | 0 Hz       |
| TX Nucleus            | None       |
| TX delta frequency    | 0 Hz       |
| Coil elements         | HEA;HEP    |
| Acquisition duration  | 0 ms       |
| Mode                  | Off        |

## BOLD

|                      |       |
|----------------------|-------|
| Time to center       | 6.2 s |
| Subtract             | Off   |
| StdDev               | Off   |
| MIP-Sag              | Off   |
| MIP-Cor              | Off   |
| MIP-Tra              | Off   |
| MIP-Time             | Off   |
| Save original images | On    |
| Distortion Corr.     | Off   |
| Contrasts            | 1     |
| Save original images | On    |

**SIEMENS MAGNETOM Skyra syngo MR D13**

\\USER\NIB\TNU\_Clinical\NAIIMS\_VD13A\_15MAY2015\MPRAGE SAG TFL  
 TA:4:17 PAT:2 Voxel size:1.0×1.0×1.0 mm Rel. SNR:1.00 :tfl

## Properties

|                                 |        |
|---------------------------------|--------|
| Prio Recon                      | Off    |
| Load to viewer                  | On     |
| Inline movie                    | Off    |
| Auto store images               | On     |
| Load to stamp segments          | Off    |
| Load images to graphic segments | Off    |
| Auto open inline display        | Off    |
| Wait for user to start          | Off    |
| Start measurements              | single |

## Routine

|                    |                               |
|--------------------|-------------------------------|
| Nr. of slab groups | 1                             |
| Slabs              | 1                             |
| Dist. factor       | 50 %                          |
| Position           | L0.7 A14.2 F37.7 mm           |
| Orientation        | Sagittal                      |
| Phase enc. dir.    | A >> P                        |
| AutoAlign          | Head > Brain                  |
| Phase oversampling | 0 %                           |
| Slice oversampling | 0.0 %                         |
| FoV read           | 256 mm                        |
| FoV phase          | 100.0 %                       |
| Slice thickness    | 1.00 mm                       |
| TR                 | 1900.0 ms                     |
| TE                 | 2.52 ms                       |
| Averages           | 1                             |
| Concatenations     | 1                             |
| Filter             | Raw filter, Prescan Normalize |
| Coil elements      | HEA;HEP;SP1                   |

## Contrast

|                   |                  |
|-------------------|------------------|
| Magn. preparation | Non-sel. IR      |
| TI                | 900 ms           |
| Flip angle        | 9 deg            |
| Fat suppr.        | None             |
| Water suppr.      | None             |
| Averaging mode    | Long term        |
| Measurements      | 1                |
| Reconstruction    | Magnitude        |
| Multiple series   | Each measurement |

## Resolution

|                       |            |
|-----------------------|------------|
| Base resolution       | 256        |
| Phase resolution      | 96 %       |
| Phase partial Fourier | Off        |
| Interpolation         | Off        |
| PAT mode              | GRAPPA     |
| Accel. factor PE      | 2          |
| Ref. lines PE         | 24         |
| Reference scan mode   | Integrated |
| Image Filter          | Off        |
| Distortion Corr.      | Off        |
| Accel. factor 3D      | 1          |
| Unfiltered images     | Off        |
| Prescan Normalize     | On         |
| Normalize             | Off        |
| B1 filter             | Off        |
| Raw filter            | On         |
| Intensity             | Weak       |
| Slope                 | 25         |
| Elliptical filter     | Off        |
| Slice resolution      | 100 %      |
| Slice partial Fourier | Off        |

## Geometry

|                     |                     |
|---------------------|---------------------|
| Nr. of slab groups  | 1                   |
| Slabs               | 1                   |
| Dist. factor        | 50 %                |
| Position            | L0.7 A14.2 F37.7 mm |
| Phase enc. dir.     | A >> P              |
| Phase oversampling  | 0 %                 |
| Slice oversampling  | 0.0 %               |
| Slices per slab     | 176                 |
| Multi-slice mode    | Single shot         |
| Series              | Ascending           |
| Nr. of sat. regions | 0                   |
| Position mode       | L-P-H               |
| Fat suppr.          | None                |
| Water suppr.        | None                |
| Special sat.        | None                |
| Table position      | P                   |

## System

|                          |                     |
|--------------------------|---------------------|
| Body                     | Off                 |
| HEP                      | On                  |
| HEA                      | On                  |
| SP5                      | Off                 |
| SP6                      | Off                 |
| SP7                      | Off                 |
| SP8                      | Off                 |
| SP1                      | On                  |
| SP2                      | Off                 |
| SP3                      | Off                 |
| SP4                      | Off                 |
| Position mode            | L-P-H               |
| Positioning mode         | FIX                 |
| Table position           | H                   |
| Table position           | 0 mm                |
| MSMA                     | S - C - T           |
| Sagittal                 | R >> L              |
| Coronal                  | A >> P              |
| Transversal              | F >> H              |
| Save uncombined          | Off                 |
| Coil Combine Mode        | Adaptive Combine    |
| AutoAlign                | Head > Brain        |
| Coil Select Mode         | Default             |
| Shim mode                | Standard            |
| Adjust with body coil    | On                  |
| Confirm freq. adjustment | Off                 |
| Assume Dominant Fat      | Off                 |
| Assume Silicone          | Off                 |
| Adjustment Tolerance     | Auto                |
| ? Ref. amplitude 1H      | 0.000 V             |
| Position                 | L0.7 A14.2 F37.7 mm |
| Rotation                 | 0.00 deg            |
| F >> H                   | 256 mm              |
| A >> P                   | 256 mm              |
| R >> L                   | 176 mm              |
| Frequency 1H             | 123.135762 MHz      |
| Correction factor        | 1                   |
| SLoopIRns1 1H            | 621.738 V           |
| Gain                     | Low                 |
| Table position           | 0 mm                |
| Img. Scale. Cor.         | 1.000               |

**Physio**

|                   |             |
|-------------------|-------------|
| 1st Signal/Mode   | None        |
| Magn. preparation | Non-sel. IR |
| TI                | 900 ms      |
| Dark blood        | Off         |
| Resp. control     | Off         |

**Inline**

|                       |     |
|-----------------------|-----|
| Distortion correction | Off |
|-----------------------|-----|

**Sequence**

|                       |             |
|-----------------------|-------------|
| Introduction          | Off         |
| Dimension             | 3D          |
| Elliptical scanning   | Off         |
| Averaging mode        | Long term   |
| Multi-slice mode      | Single shot |
| Reordering            | Linear      |
| Asymmetric echo       | Allowed     |
| Bandwidth             | 170 Hz/Px   |
| Flow comp.            | No          |
| Echo spacing          | 7.5 ms      |
| Turbo factor          | 176         |
| RF pulse type         | Normal      |
| Gradient mode         | Normal      |
| Excitation            | Non-sel.    |
| RF spoiling           | On          |
| TX/RX delta frequency | 0 Hz        |
| TX Nucleus            | None        |
| TX delta frequency    | 0 Hz        |
| Coil elements         | HEA;HEP;SP1 |
| Acquisition duration  | 0 ms        |
| Mode                  | Off         |

**BOLD**

|                      |     |
|----------------------|-----|
| Subtract             | Off |
| StdDev               | Off |
| MIP-Sag              | Off |
| MIP-Cor              | Off |
| MIP-Tra              | Off |
| MIP-Time             | Off |
| Save original images | On  |
| Distortion Corr.     | Off |
| Save original images | On  |

**SIEMENS MAGNETOM Skyra syngo MR D13**

\\USER\NIB\TNU\_Clinical\NAIIMS\_VD13A\_15MAY2015\T2 SAG TSE  
TA:4:45 PAT:2 Voxel size:1.0×1.0×1.0 mm Rel. SNR:1.00 :spcR

**Properties**

|                                 |        |
|---------------------------------|--------|
| Prio Recon                      | Off    |
| Load to viewer                  | On     |
| Inline movie                    | Off    |
| Auto store images               | On     |
| Load to stamp segments          | Off    |
| Load images to graphic segments | Off    |
| Auto open inline display        | Off    |
| Wait for user to start          | Off    |
| Start measurements              | single |

**Routine**

|                    |                               |
|--------------------|-------------------------------|
| Nr. of slab groups | 1                             |
| Slabs              | 1                             |
| Position           | L0.7 A14.2 F37.7 mm           |
| Orientation        | Sagittal                      |
| Phase enc. dir.    | A >> P                        |
| AutoAlign          | Head > Brain                  |
| Phase oversampling | 0 %                           |
| Slice oversampling | 0.0 %                         |
| FoV read           | 256 mm                        |
| FoV phase          | 100.0 %                       |
| Slice thickness    | 1.00 mm                       |
| TR                 | 3200 ms                       |
| TE                 | 411.0 ms                      |
| Concatenations     | 1                             |
| Filter             | Raw filter, Prescan Normalize |
| Coil elements      | HEA;HEP;SP1                   |

**Contrast**

|                   |                  |
|-------------------|------------------|
| MTC               | Off              |
| Magn. preparation | None             |
| Fat suppr.        | None             |
| Restore magn.     | On               |
| Measurements      | 1                |
| Reconstruction    | Magnitude        |
| Multiple series   | Each measurement |

## Resolution

|                       |            |
|-----------------------|------------|
| Base resolution       | 256        |
| Phase resolution      | 100 %      |
| Phase partial Fourier | Allowed    |
| Interpolation         | Off        |
| PAT mode              | GRAPPA     |
| Accel. factor PE      | 2          |
| Ref. lines PE         | 24         |
| Reference scan mode   | Integrated |
| Image Filter          | Off        |
| Distortion Corr.      | Off        |
| Accel. factor 3D      | 1          |
| Unfiltered images     | Off        |
| Prescan Normalize     | On         |
| Normalize             | Off        |
| B1 filter             | Off        |
| Raw filter            | On         |
| Intensity             | Weak       |
| Slope                 | 25         |
| Elliptical filter     | Off        |
| Slice resolution      | 100 %      |
| Slice partial Fourier | Off        |

## Geometry

|                     |                     |
|---------------------|---------------------|
| Nr. of slab groups  | 1                   |
| Slabs               | 1                   |
| Position            | L0.7 A14.2 F37.7 mm |
| Phase enc. dir.     | A >> P              |
| Phase oversampling  | 0 %                 |
| Slice oversampling  | 0.0 %               |
| Slices per slab     | 176                 |
| Series              | Interleaved         |
| Nr. of sat. regions | 0                   |
| Position mode       | L-P-H               |
| Fat suppr.          | None                |
| Special sat.        | None                |
| Special sat.        | None                |
| Table position      | P                   |
| Restore magn.       | On                  |

## System

|                          |                      |
|--------------------------|----------------------|
| Body                     | Off                  |
| HEP                      | On                   |
| HEA                      | On                   |
| SP5                      | Off                  |
| SP6                      | Off                  |
| SP7                      | Off                  |
| SP8                      | Off                  |
| SP1                      | On                   |
| SP2                      | Off                  |
| SP3                      | Off                  |
| SP4                      | Off                  |
| Position mode            | L-P-H                |
| Positioning mode         | FIX                  |
| Table position           | H                    |
| Table position           | 0 mm                 |
| MSMA                     | S - C - T            |
| Sagittal                 | R >> L               |
| Coronal                  | A >> P               |
| Transversal              | F >> H               |
| Save uncombined          | Off                  |
| Coil Combine Mode        | Sum of Squares       |
| AutoAlign                | Head > Brain         |
| Coil Select Mode         | Off - AutoCoilSelect |
| Shim mode                | Standard             |
| Adjust with body coil    | Off                  |
| Confirm freq. adjustment | Off                  |
| Assume Dominant Fat      | Off                  |
| Assume Silicone          | Off                  |
| Adjustment Tolerance     | Auto                 |
| ? Ref. amplitude 1H      | 0.000 V              |
| Position                 | L0.7 A14.2 F37.7 mm  |
| Rotation                 | 0.00 deg             |
| F >> H                   | 256 mm               |
| A >> P                   | 256 mm               |
| R >> L                   | 176 mm               |
| Frequency 1H             | 123.135762 MHz       |
| Correction factor        | 1                    |
| SRFExcit 1H              | 358.333 V            |
| Gain                     | High                 |
| Table position           | 0 mm                 |
| Img. Scale. Cor.         | 1.000                |

**Physio**

|                   |      |
|-------------------|------|
| 1st Signal/Mode   | None |
| Trigger delay     | 0 ms |
| Magn. preparation | None |
| Dark blood        | Off  |
| Resp. control     | Off  |

**Inline**

|                       |     |
|-----------------------|-----|
| Distortion correction | Off |
|-----------------------|-----|

**Sequence**

|                       |             |
|-----------------------|-------------|
| Introduction          | Off         |
| Dimension             | 3D          |
| Elliptical scanning   | Off         |
| Reordering            | Linear      |
| Bandwidth             | 751 Hz/Px   |
| Flow comp.            | No          |
| Allowed delay         | 30 s        |
| Echo spacing          | 3.57 ms     |
| Adiabatic-mode        | Off         |
| Turbo factor          | 282         |
| Echo train duration   | 917         |
| RF pulse type         | Normal      |
| Gradient mode         | Fast        |
| Excitation            | Non-sel.    |
| Flip angle mode       | T2 var      |
| TX/RX delta frequency | 0 Hz        |
| TX Nucleus            | None        |
| TX delta frequency    | 0 Hz        |
| Coil elements         | HEA;HEP;SP1 |
| Acquisition duration  | 0 ms        |
| Organ under exam.     | Standard    |
| Tissue T1             | 940 ms      |
| Tissue T2             | 100 ms      |

**BOLD**

|                      |     |
|----------------------|-----|
| Subtract             | Off |
| StdDev               | Off |
| MIP-Sag              | Off |
| MIP-Cor              | Off |
| MIP-Tra              | Off |
| MIP-Time             | Off |
| Save original images | On  |
| Distortion Corr.     | Off |
| Save original images | On  |

**SIEMENS MAGNETOM Skyra syngo MR D13**

\\USER\NIB\TNU\_Clinical\NAIIMS\_VD13A\_15MAY2015\FLAIR SAG VFL  
TA:7:02 PAT:2 Voxel size:0.5×0.5×1.0 mm Rel. SNR:1.00 :spcir

**Properties**

|                                 |        |
|---------------------------------|--------|
| Prio Recon                      | Off    |
| Load to viewer                  | On     |
| Inline movie                    | Off    |
| Auto store images               | On     |
| Load to stamp segments          | Off    |
| Load images to graphic segments | Off    |
| Auto open inline display        | Off    |
| Wait for user to start          | Off    |
| Start measurements              | single |

**Routine**

|                    |                               |
|--------------------|-------------------------------|
| Nr. of slab groups | 1                             |
| Slabs              | 1                             |
| Position           | L0.7 A14.2 F37.7 mm           |
| Orientation        | Sagittal                      |
| Phase enc. dir.    | A >> P                        |
| AutoAlign          | Head > Brain                  |
| Phase oversampling | 0 %                           |
| Slice oversampling | 0.0 %                         |
| FoV read           | 256 mm                        |
| FoV phase          | 100.0 %                       |
| Slice thickness    | 1.00 mm                       |
| TR                 | 4800 ms                       |
| TE                 | 353.0 ms                      |
| Concatenations     | 1                             |
| Filter             | Raw filter, Prescan Normalize |
| Coil elements      | HEA;HEP;SP1                   |

**Contrast**

|                   |                  |
|-------------------|------------------|
| MTC               | Off              |
| Magn. preparation | Non-sel. T2-IR   |
| TI 1              | 1800 ms          |
| Fat suppr.        | Fat sat.         |
| Fat sat. mode     | Strong           |
| Restore magn.     | Off              |
| Measurements      | 1                |
| Reconstruction    | Magnitude        |
| Multiple series   | Each measurement |

## Resolution

|                       |            |
|-----------------------|------------|
| Base resolution       | 256        |
| Phase resolution      | 100 %      |
| Phase partial Fourier | Allowed    |
| Interpolation         | On         |
| PAT mode              | GRAPPA     |
| Accel. factor PE      | 2          |
| Ref. lines PE         | 40         |
| Reference scan mode   | Integrated |
| Image Filter          | Off        |
| Distortion Corr.      | Off        |
| Accel. factor 3D      | 1          |
| Unfiltered images     | Off        |
| Prescan Normalize     | On         |
| Normalize             | Off        |
| B1 filter             | Off        |
| Raw filter            | On         |
| Intensity             | Weak       |
| Slope                 | 25         |
| Elliptical filter     | Off        |
| Slice resolution      | 100 %      |
| Slice partial Fourier | Off        |

## Geometry

|                     |                     |
|---------------------|---------------------|
| Nr. of slab groups  | 1                   |
| Slabs               | 1                   |
| Position            | L0.7 A14.2 F37.7 mm |
| Phase enc. dir.     | A >> P              |
| Phase oversampling  | 0 %                 |
| Slice oversampling  | 0.0 %               |
| Slices per slab     | 176                 |
| Series              | Interleaved         |
| Nr. of sat. regions | 0                   |
| Position mode       | L-P-H               |
| Fat suppr.          | Fat sat.            |
| Special sat.        | None                |
| Fat sat. mode       | Strong              |
| Special sat.        | None                |
| Table position      | P                   |
| Restore magn.       | Off                 |

## System

|                          |                     |
|--------------------------|---------------------|
| Body                     | Off                 |
| HEP                      | On                  |
| HEA                      | On                  |
| SP5                      | Off                 |
| SP6                      | Off                 |
| SP7                      | Off                 |
| SP8                      | Off                 |
| SP1                      | On                  |
| SP2                      | Off                 |
| SP3                      | Off                 |
| SP4                      | Off                 |
| Position mode            | L-P-H               |
| Positioning mode         | FIX                 |
| Table position           | H                   |
| Table position           | 0 mm                |
| MSMA                     | S - C - T           |
| Sagittal                 | R >> L              |
| Coronal                  | A >> P              |
| Transversal              | F >> H              |
| Save uncombined          | Off                 |
| Coil Combine Mode        | Adaptive Combine    |
| AutoAlign                | Head > Brain        |
| Coil Select Mode         | On - AutoCoilSelect |
| Shim mode                | Standard            |
| Adjust with body coil    | Off                 |
| Confirm freq. adjustment | Off                 |
| Assume Dominant Fat      | Off                 |
| Assume Silicone          | Off                 |
| Adjustment Tolerance     | Auto                |
| ? Ref. amplitude 1H      | 0.000 V             |
| Position                 | L0.7 A14.2 F37.7 mm |
| Rotation                 | 0.00 deg            |
| F >> H                   | 256 mm              |
| A >> P                   | 256 mm              |
| R >> L                   | 176 mm              |
| Frequency 1H             | 123.135762 MHz      |
| Correction factor        | 1                   |
| SLoopFCSatNS 1H          | 106.000 V           |
| Gain                     | High                |
| Table position           | 0 mm                |
| Img. Scale. Cor.         | 1.000               |

## Physio

|                   |                |
|-------------------|----------------|
| 1st Signal/Mode   | None           |
| Trigger delay     | 0 ms           |
| Magn. preparation | Non-sel. T2-IR |
| TI 1              | 1800 ms        |
| Dark blood        | Off            |
| Resp. control     | Off            |

## Inline

|                       |     |
|-----------------------|-----|
| Distortion correction | Off |
|-----------------------|-----|

## Sequence

|                       |             |
|-----------------------|-------------|
| Introduction          | Off         |
| Dimension             | 3D          |
| Elliptical scanning   | Off         |
| Reordering            | Linear      |
| Bandwidth             | 781 Hz/Px   |
| Flow comp.            | No          |
| Allowed delay         | 30 s        |
| Echo spacing          | 3.53 ms     |
| Adiabatic-mode        | Off         |
| Turbo factor          | 298         |
| Echo train duration   | 875         |
| RF pulse type         | Normal      |
| Gradient mode         | Fast        |
| Excitation            | Non-sel.    |
| Flip angle mode       | T2 var      |
| TX/RX delta frequency | 0 Hz        |
| TX Nucleus            | None        |
| TX delta frequency    | 0 Hz        |
| Coil elements         | HEA;HEP;SP1 |
| Acquisition duration  | 0 ms        |
| Organ under exam.     | Standard    |
| Tissue T1             | 940 ms      |
| Tissue T2             | 100 ms      |

**BOLD**

|                      |     |
|----------------------|-----|
| Subtract             | Off |
| StdDev               | Off |
| MIP-Sag              | Off |
| MIP-Cor              | Off |
| MIP-Tra              | Off |
| MIP-Time             | Off |
| Save original images | On  |
| Distortion Corr.     | Off |
| Save original images | On  |

**SIEMENS MAGNETOM Skyra syngo MR D13**

\\USER\NIB\TNU\_Clinical\NAIIMS\_VD13A\_15MAY2015\PDT2 AX TSE  
TA:2:15 PAT:3 Voxel size:0.9×0.9×3.0 mm Rel. SNR:1.00 :tse

**Properties**

|                                 |        |
|---------------------------------|--------|
| Prio Recon                      | Off    |
| Load to viewer                  | On     |
| Inline movie                    | Off    |
| Auto store images               | On     |
| Load to stamp segments          | Off    |
| Load images to graphic segments | Off    |
| Auto open inline display        | Off    |
| Wait for user to start          | Off    |
| Start measurements              | single |

## Routine

|                     |                                      |
|---------------------|--------------------------------------|
| Nr. of slice groups | 1                                    |
| Slices              | 54                                   |
| Dist. factor        | 0 %                                  |
| Position            | R0.5 A9.3 F6.3 mm                    |
| Orientation         | Transversal                          |
| Phase enc. dir.     | R >> L                               |
| AutoAlign           | Head > Brain                         |
| Phase oversampling  | 0 %                                  |
| FoV read            | 240 mm                               |
| FoV phase           | 90.6 %                               |
| Slice thickness     | 3.0 mm                               |
| TR                  | 3000.0 ms                            |
| TE 1                | 11.0 ms                              |
| Averages            | 1                                    |
| Concatenations      | 3                                    |
| Filter              | Prescan Normalize, Elliptical filter |
| Coil elements       | HEA;HEP                              |

## Contrast

|                   |           |
|-------------------|-----------|
| TD                | 0.0 ms    |
| MTC               | Off       |
| Magn. preparation | None      |
| Flip angle        | 150 deg   |
| Fat suppr.        | None      |
| Water suppr.      | None      |
| Restore magn.     | Off       |
| Averaging mode    | Long term |
| Measurements      | 1         |
| Reconstruction    | Magnitude |
| Multiple series   | Off       |

**Resolution**

|                       |            |
|-----------------------|------------|
| Base resolution       | 256        |
| Phase resolution      | 100 %      |
| Phase partial Fourier | Off        |
| Trajectory            | Cartesian  |
| Interpolation         | Off        |
| PAT mode              | GRAPPA     |
| Accel. factor PE      | 3          |
| Ref. lines PE         | 24         |
| Reference scan mode   | Integrated |
| Image Filter          | Off        |
| Distortion Corr.      | Off        |
| TD                    | 0.0 ms     |
| Unfiltered images     | Off        |
| Prescan Normalize     | On         |
| Normalize             | Off        |
| B1 filter             | Off        |
| Raw filter            | Off        |
| Elliptical filter     | On         |
| Mode                  | Inplane    |

**Geometry**

|                     |                   |
|---------------------|-------------------|
| Nr. of slice groups | 1                 |
| Slices              | 54                |
| Dist. factor        | 0 %               |
| Position            | R0.5 A9.3 F6.3 mm |
| Phase enc. dir.     | R >> L            |
| Phase oversampling  | 0 %               |
| Multi-slice mode    | Interleaved       |
| Series              | Interleaved       |
| Nr. of sat. regions | 0                 |
| Position mode       | L-P-H             |
| Fat suppr.          | None              |
| Water suppr.        | None              |
| Special sat.        | None              |
| Special sat.        | None              |
| Table position      | P                 |
| Restore magn.       | Off               |

## System

|                          |                   |
|--------------------------|-------------------|
| Body                     | Off               |
| HEP                      | On                |
| HEA                      | On                |
| SP5                      | Off               |
| SP6                      | Off               |
| SP7                      | Off               |
| SP8                      | Off               |
| SP1                      | Off               |
| SP2                      | Off               |
| SP3                      | Off               |
| SP4                      | Off               |
| Position mode            | L-P-H             |
| Positioning mode         | FIX               |
| Table position           | H                 |
| Table position           | 0 mm              |
| MSMA                     | S - C - T         |
| Sagittal                 | R >> L            |
| Coronal                  | A >> P            |
| Transversal              | F >> H            |
| Save uncombined          | Off               |
| Coil Combine Mode        | Adaptive Combine  |
| AutoAlign                | Head > Brain      |
| Coil Select Mode         | Default           |
| Shim mode                | Standard          |
| Adjust with body coil    | Off               |
| Confirm freq. adjustment | Off               |
| Assume Dominant Fat      | Off               |
| Assume Silicone          | Off               |
| Adjustment Tolerance     | Auto              |
| ? Ref. amplitude 1H      | 0.000 V           |
| Position                 | R0.5 A9.3 F6.3 mm |
| Rotation                 | 90.70 deg         |
| A >> P                   | 240 mm            |
| R >> L                   | 218 mm            |
| F >> H                   | 162 mm            |
| Frequency 1H             | 123.135762 MHz    |
| Correction factor        | 1                 |
| VExcit 1H                | 193.005 V         |
| Gain                     | High              |
| Table position           | 0 mm              |
| Img. Scale. Cor.         | 1.000             |

## Physio

|                   |           |
|-------------------|-----------|
| 1st Signal/Mode   | None      |
| Magn. preparation | None      |
| Dark blood        | Off       |
| Trajectory        | Cartesian |
| Resp. control     | Off       |

## Inline

|                       |     |
|-----------------------|-----|
| Distortion correction | Off |
|-----------------------|-----|

## Sequence

|                       |             |
|-----------------------|-------------|
| Introduction          | Off         |
| Dimension             | 2D          |
| Compensate T2 decay   | Off         |
| Averaging mode        | Long term   |
| Multi-slice mode      | Interleaved |
| Reduce Motion Sens.   | Off         |
| Contrasts             | 2           |
| Bandwidth             | 186 Hz/Px   |
| Flow comp.            | No          |
| Allowed delay         | 30 s        |
| Echo spacing          | 11.2 ms     |
| Define                | Echo trains |
| Turbo factor          | 7           |
| Echo trains per slice | 14          |
| RF pulse type         | Low SAR     |
| Gradient mode         | Normal      |
| Hyperecho             | Off         |
| TX/RX delta frequency | 0 Hz        |
| TX Nucleus            | None        |
| TX delta frequency    | 0 Hz        |
| Coil elements         | HEA;HEP     |
| Acquisition duration  | 0 ms        |
| Mode                  | Off         |

**BOLD**

|                      |     |
|----------------------|-----|
| Subtract             | Off |
| StdDev               | Off |
| MIP-Sag              | Off |
| MIP-Cor              | Off |
| MIP-Tra              | Off |
| MIP-Time             | Off |
| Save original images | On  |
| Distortion Corr.     | Off |
| Contrasts            | 2   |
| Save original images | On  |

**SIEMENS MAGNETOM Skyra syngo MR D13**

\\USER\NIB\TNU\_Clinical\NAIIMS\_VD13A\_15MAY2015\PSIR AX TSE  
 TA:4:37 PAT:Off Voxel size:0.6×0.6×2.0 mm Rel. SNR:1.00 :tir\_rs

**Properties**

|                                 |        |
|---------------------------------|--------|
| Prio Recon                      | Off    |
| Load to viewer                  | On     |
| Inline movie                    | Off    |
| Auto store images               | On     |
| Load to stamp segments          | Off    |
| Load images to graphic segments | Off    |
| Auto open inline display        | Off    |
| Wait for user to start          | Off    |
| Start measurements              | single |

**Routine**

|                     |                               |
|---------------------|-------------------------------|
| Nr. of slice groups | 1                             |
| Slices              | 45                            |
| Dist. factor        | 0 %                           |
| Position            | R0.5 A3.7 H15.1 mm            |
| Orientation         | Transversal                   |
| Phase enc. dir.     | R >> L                        |
| AutoAlign           | Head > Brain                  |
| Phase oversampling  | 0 %                           |
| FoV read            | 220 mm                        |
| FoV phase           | 78.1 %                        |
| Slice thickness     | 2.0 mm                        |
| TR                  | 3300.0 ms                     |
| TE                  | 13.0 ms                       |
| Averages            | 1                             |
| Concatenations      | 2                             |
| Filter              | Raw filter, Prescan Normalize |
| Coil elements       | HEA;HEP                       |

**Contrast**

|                          |               |
|--------------------------|---------------|
| TD                       | 0.0 ms        |
| MTC                      | Off           |
| Magn. preparation        | Slice-sel. IR |
| TI                       | 499 ms        |
| Freeze suppressed tissue | Off           |
| Flip angle               | 150 deg       |
| Fat suppr.               | None          |
| Water suppr.             | None          |
| Restore magn.            | Off           |
| Averaging mode           | Long term     |
| Measurements             | 1             |
| Reconstruction           | Real          |
| Multiple series          | Off           |

## Resolution

|                       |           |
|-----------------------|-----------|
| Base resolution       | 384       |
| Phase resolution      | 81 %      |
| Phase partial Fourier | Off       |
| Trajectory            | Cartesian |
| Interpolation         | Off       |
| PAT mode              | None      |
| Image Filter          | Off       |
| Distortion Corr.      | Off       |
| TD                    | 0.0 ms    |
| Unfiltered images     | Off       |
| Prescan Normalize     | On        |
| Normalize             | Off       |
| B1 filter             | Off       |
| Raw filter            | On        |
| Intensity             | Medium    |
| Slope                 | 48        |
| Elliptical filter     | Off       |

## Geometry

|                     |                    |
|---------------------|--------------------|
| Nr. of slice groups | 1                  |
| Slices              | 45                 |
| Dist. factor        | 0 %                |
| Position            | R0.5 A3.7 H15.1 mm |
| Phase enc. dir.     | R >> L             |
| Phase oversampling  | 0 %                |
| Multi-slice mode    | Interleaved        |
| Series              | Interleaved        |
| Nr. of sat. regions | 0                  |
| Position mode       | L-P-H              |
| Fat suppr.          | None               |
| Water suppr.        | None               |
| Special sat.        | None               |
| Special sat.        | None               |
| Table position      | P                  |
| Restore magn.       | Off                |

## System

|                          |                    |
|--------------------------|--------------------|
| Body                     | Off                |
| HEP                      | On                 |
| HEA                      | On                 |
| SP5                      | Off                |
| SP6                      | Off                |
| SP7                      | Off                |
| SP8                      | Off                |
| SP1                      | Off                |
| SP2                      | Off                |
| SP3                      | Off                |
| SP4                      | Off                |
| Position mode            | L-P-H              |
| Positioning mode         | FIX                |
| Table position           | H                  |
| Table position           | 0 mm               |
| MSMA                     | S - C - T          |
| Sagittal                 | R >> L             |
| Coronal                  | A >> P             |
| Transversal              | F >> H             |
| Save uncombined          | Off                |
| Coil Combine Mode        | Adaptive Combine   |
| AutoAlign                | Head > Brain       |
| Coil Select Mode         | Default            |
| Shim mode                | Standard           |
| Adjust with body coil    | Off                |
| Confirm freq. adjustment | Off                |
| Assume Dominant Fat      | Off                |
| Assume Silicone          | Off                |
| Adjustment Tolerance     | Auto               |
| ? Ref. amplitude 1H      | 0.000 V            |
| Position                 | R0.5 A3.7 H15.1 mm |
| Rotation                 | 90.70 deg          |
| A >> P                   | 220 mm             |
| R >> L                   | 172 mm             |
| F >> H                   | 90 mm              |
| Frequency 1H             | 123.135762 MHz     |
| Correction factor        | 1                  |
| Excit 1H                 | 284.932 V          |
| Gain                     | High               |
| Table position           | 0 mm               |
| Img. Scale. Cor.         | 1.000              |

## Physio

|                   |               |
|-------------------|---------------|
| 1st Signal/Mode   | None          |
| Magn. preparation | Slice-sel. IR |
| TI                | 499 ms        |
| Dark blood        | Off           |
| Trajectory        | Cartesian     |
| Resp. control     | Off           |

## Inline

|                       |     |
|-----------------------|-----|
| Distortion correction | Off |
|-----------------------|-----|

## Sequence

|                       |              |
|-----------------------|--------------|
| Introduction          | Off          |
| Dimension             | 2D           |
| Compensate T2 decay   | Off          |
| Averaging mode        | Long term    |
| Multi-slice mode      | Interleaved  |
| Reduce Motion Sens.   | On           |
| Contrasts             | 1            |
| Bandwidth             | 228 Hz/Px    |
| Flow comp.            | Slice        |
| Allowed delay         | 60 s         |
| Echo spacing          | 13.5 ms      |
| Define                | Turbo factor |
| Turbo factor          | 6            |
| Echo trains per slice | 41           |
| RF pulse type         | Low SAR      |
| Gradient mode         | Normal       |
| Hyperecho             | Off          |
| TX/RX delta frequency | 0 Hz         |
| TX Nucleus            | None         |
| TX delta frequency    | 0 Hz         |
| Coil elements         | HEA;HEP      |
| Acquisition duration  | 0 ms         |
| Mode                  | Off          |

**BOLD**

|                      |     |
|----------------------|-----|
| Subtract             | Off |
| StdDev               | Off |
| MIP-Sag              | Off |
| MIP-Cor              | Off |
| MIP-Tra              | Off |
| MIP-Time             | Off |
| Save original images | On  |
| Distortion Corr.     | Off |
| Contrasts            | 1   |
| Save original images | On  |

**SIEMENS MAGNETOM Skyra syngo MR D13**

\\USER\NIB\TNU\_Clinical\NAIIMS\_VD13A\_15MAY2015\MTC4k AX WIP805  
TA:2:44 PAT:2 Voxel size:1.0×1.0×3.0 mm Rel. SNR:1.00 :fl

**Properties**

|                                 |        |
|---------------------------------|--------|
| Prio Recon                      | Off    |
| Load to viewer                  | On     |
| Inline movie                    | Off    |
| Auto store images               | On     |
| Load to stamp segments          | Off    |
| Load images to graphic segments | Off    |
| Auto open inline display        | Off    |
| Wait for user to start          | Off    |
| Start measurements              | single |

## Routine

|                    |                   |
|--------------------|-------------------|
| Nr. of slab groups | 1                 |
| Slabs              | 1                 |
| Dist. factor       | 20 %              |
| Position           | R0.5 A3.7 F6.0 mm |
| Orientation        | Transversal       |
| Phase enc. dir.    | R >> L            |
| AutoAlign          | Head > Brain      |
| Phase oversampling | 0 %               |
| Slice oversampling | 0.0 %             |
| FoV read           | 256 mm            |
| FoV phase          | 75.0 %            |
| Slice thickness    | 3.00 mm           |
| TR                 | 43.0 ms           |
| TE                 | 2.30 ms           |
| Averages           | 1                 |
| Concatenations     | 1                 |
| Filter             | Prescan Normalize |
| Coil elements      | HEA;HEP           |

## Contrast

|                   |                  |
|-------------------|------------------|
| MTC               | On               |
| Magn. preparation | None             |
| Flip angle        | 10 deg           |
| Fat suppr.        | None             |
| Water suppr.      | None             |
| SWI               | Off              |
| Averaging mode    | Short term       |
| Measurements      | 1                |
| Reconstruction    | Magn./Phase      |
| Multiple series   | Each measurement |

## Resolution

|                       |            |
|-----------------------|------------|
| Base resolution       | 256        |
| Phase resolution      | 100 %      |
| Phase partial Fourier | Off        |
| Interpolation         | Off        |
| PAT mode              | GRAPPA     |
| Accel. factor PE      | 2          |
| Ref. lines PE         | 40         |
| Reference scan mode   | Integrated |
| Image Filter          | Off        |
| Distortion Corr.      | Off        |
| Accel. factor 3D      | 1          |
| Unfiltered images     | Off        |
| Prescan Normalize     | On         |
| Normalize             | Off        |
| B1 filter             | Off        |
| Raw filter            | Off        |
| Elliptical filter     | Off        |
| Slice resolution      | 75 %       |
| Slice partial Fourier | Off        |

## Geometry

|                     |                   |
|---------------------|-------------------|
| Nr. of slab groups  | 1                 |
| Slabs               | 1                 |
| Dist. factor        | 20 %              |
| Position            | R0.5 A3.7 F6.0 mm |
| Phase enc. dir.     | R >> L            |
| Phase oversampling  | 0 %               |
| Slice oversampling  | 0.0 %             |
| Slices per slab     | 48                |
| Multi-slice mode    | Interleaved       |
| Series              | Interleaved       |
| Saturation mode     | Standard          |
| Nr. of sat. regions | 0                 |
| Position mode       | L-P-H             |
| Fat suppr.          | None              |
| Water suppr.        | None              |
| Special sat.        | None              |
| Special sat.        | None              |
| Table position      | P                 |

## System

|                          |                   |
|--------------------------|-------------------|
| Body                     | Off               |
| HEP                      | On                |
| HEA                      | On                |
| SP5                      | Off               |
| SP6                      | Off               |
| SP7                      | Off               |
| SP8                      | Off               |
| SP1                      | Off               |
| SP2                      | Off               |
| SP3                      | Off               |
| SP4                      | Off               |
| Position mode            | L-P-H             |
| Positioning mode         | FIX               |
| Table position           | H                 |
| Table position           | 0 mm              |
| MSMA                     | S - C - T         |
| Sagittal                 | R >> L            |
| Coronal                  | A >> P            |
| Transversal              | F >> H            |
| Save uncombined          | Off               |
| Coil Combine Mode        | Sum of Squares    |
| AutoAlign                | Head > Brain      |
| Coil Select Mode         | Default           |
| Shim mode                | Standard          |
| Adjust with body coil    | Off               |
| Confirm freq. adjustment | Off               |
| Assume Dominant Fat      | Off               |
| Assume Silicone          | Off               |
| Adjustment Tolerance     | Auto              |
| ? Ref. amplitude 1H      | 0.000 V           |
| Position                 | R0.5 A3.7 F6.0 mm |
| Rotation                 | 90.70 deg         |
| A >> P                   | 256 mm            |
| R >> L                   | 192 mm            |
| F >> H                   | 144 mm            |
| Frequency 1H             | 123.135762 MHz    |
| Correction factor        | 1                 |
| greMSMSatNS 1H           | 197.352 V         |
| Gain                     | Low               |
| Table position           | 0 mm              |
| Img. Scale. Cor.         | 1.000             |

## Physio

|                   |      |
|-------------------|------|
| 1st Signal/Mode   | None |
| Segments          | 1    |
| Tagging           | None |
| Magn. preparation | None |
| Dark blood        | Off  |
| Resp. control     | Off  |

## Inline

|                       |     |
|-----------------------|-----|
| Distortion correction | Off |
|-----------------------|-----|

## Sequence

|                       |               |
|-----------------------|---------------|
| Introduction          | Off           |
| Dimension             | 3D            |
| Elliptical scanning   | On            |
| Averaging mode        | Short term    |
| Multi-slice mode      | Interleaved   |
| Asymmetric echo       | Off           |
| Contrasts             | 1             |
| Bandwidth             | 650 Hz/Px     |
| Flow comp.            | No            |
| Allowed delay         | 0 s           |
| RO Grad Ampl.         | 43.0 mT/m     |
| RF pulse type         | Fast          |
| Gradient mode         | Fast          |
| Excitation            | Slab-sel.     |
| RF spoiling           | On            |
| Optimised MT          | On            |
| MT Flip Angle         | 600 deg       |
| MT Duration           | 15000 us      |
| MT Offset             | 4000 Hz       |
| Spoil Moment RO       | 0 us*mT/m     |
| Spoil Moment PE & SS  | 25000 us*mT/m |
| MOSAIC Mode           | None          |
| TX/RX delta frequency | 0 Hz          |
| TX Nucleus            | None          |
| TX delta frequency    | 0 Hz          |
| Coil elements         | HEA;HEP       |
| Acquisition duration  | 0 ms          |
| Mode                  | Off           |

**BOLD**

|                      |     |
|----------------------|-----|
| Subtract             | Off |
| Liver registration   | Off |
| StdDev               | Off |
| MIP-Sag              | Off |
| MIP-Cor              | Off |
| MIP-Tra              | Off |
| MIP-Time             | Off |
| Save original images | On  |
| Distortion Corr.     | Off |
| Contrasts            | 1   |
| Save original images | On  |
| Wash - In            | Off |
| Wash - Out           | Off |
| TTP                  | Off |
| PEI                  | Off |
| MIP - time           | Off |

**SIEMENS MAGNETOM Skyra syngo MR D13**

\\USER\NIB\TNU\_Clinical\NAIIMS\_VD13A\_15MAY2015\MTC100k AX WIP805  
 TA:2:44 PAT:2 Voxel size:1.0×1.0×3.0 mm Rel. SNR:1.00 :fl

**Properties**

|                                 |        |
|---------------------------------|--------|
| Prio Recon                      | Off    |
| Load to viewer                  | On     |
| Inline movie                    | Off    |
| Auto store images               | On     |
| Load to stamp segments          | Off    |
| Load images to graphic segments | Off    |
| Auto open inline display        | Off    |
| Wait for user to start          | Off    |
| Start measurements              | single |

## Routine

|                    |                   |
|--------------------|-------------------|
| Nr. of slab groups | 1                 |
| Slabs              | 1                 |
| Dist. factor       | 20 %              |
| Position           | R0.5 A3.7 F6.0 mm |
| Orientation        | Transversal       |
| Phase enc. dir.    | R >> L            |
| AutoAlign          | Head > Brain      |
| Phase oversampling | 0 %               |
| Slice oversampling | 0.0 %             |
| FoV read           | 256 mm            |
| FoV phase          | 75.0 %            |
| Slice thickness    | 3.00 mm           |
| TR                 | 43.0 ms           |
| TE                 | 2.30 ms           |
| Averages           | 1                 |
| Concatenations     | 1                 |
| Filter             | Prescan Normalize |
| Coil elements      | HEA;HEP           |

## Contrast

|                   |                  |
|-------------------|------------------|
| MTC               | On               |
| Magn. preparation | None             |
| Flip angle        | 10 deg           |
| Fat suppr.        | None             |
| Water suppr.      | None             |
| SWI               | Off              |
| Averaging mode    | Short term       |
| Measurements      | 1                |
| Reconstruction    | Magn./Phase      |
| Multiple series   | Each measurement |

## Resolution

|                       |            |
|-----------------------|------------|
| Base resolution       | 256        |
| Phase resolution      | 100 %      |
| Phase partial Fourier | Off        |
| Interpolation         | Off        |
| PAT mode              | GRAPPA     |
| Accel. factor PE      | 2          |
| Ref. lines PE         | 40         |
| Reference scan mode   | Integrated |
| Image Filter          | Off        |
| Distortion Corr.      | Off        |
| Accel. factor 3D      | 1          |
| Unfiltered images     | Off        |
| Prescan Normalize     | On         |
| Normalize             | Off        |
| B1 filter             | Off        |
| Raw filter            | Off        |
| Elliptical filter     | Off        |
| Slice resolution      | 75 %       |
| Slice partial Fourier | Off        |

## Geometry

|                     |                   |
|---------------------|-------------------|
| Nr. of slab groups  | 1                 |
| Slabs               | 1                 |
| Dist. factor        | 20 %              |
| Position            | R0.5 A3.7 F6.0 mm |
| Phase enc. dir.     | R >> L            |
| Phase oversampling  | 0 %               |
| Slice oversampling  | 0.0 %             |
| Slices per slab     | 48                |
| Multi-slice mode    | Interleaved       |
| Series              | Interleaved       |
| Saturation mode     | Standard          |
| Nr. of sat. regions | 0                 |
| Position mode       | L-P-H             |
| Fat suppr.          | None              |
| Water suppr.        | None              |
| Special sat.        | None              |
| Special sat.        | None              |
| Table position      | P                 |

## System

|                          |                   |
|--------------------------|-------------------|
| Body                     | Off               |
| HEP                      | On                |
| HEA                      | On                |
| SP5                      | Off               |
| SP6                      | Off               |
| SP7                      | Off               |
| SP8                      | Off               |
| SP1                      | Off               |
| SP2                      | Off               |
| SP3                      | Off               |
| SP4                      | Off               |
| Position mode            | L-P-H             |
| Positioning mode         | FIX               |
| Table position           | H                 |
| Table position           | 0 mm              |
| MSMA                     | S - C - T         |
| Sagittal                 | R >> L            |
| Coronal                  | A >> P            |
| Transversal              | F >> H            |
| Save uncombined          | Off               |
| Coil Combine Mode        | Sum of Squares    |
| AutoAlign                | Head > Brain      |
| Coil Select Mode         | Default           |
| Shim mode                | Standard          |
| Adjust with body coil    | Off               |
| Confirm freq. adjustment | Off               |
| Assume Dominant Fat      | Off               |
| Assume Silicone          | Off               |
| Adjustment Tolerance     | Auto              |
| ? Ref. amplitude 1H      | 0.000 V           |
| Position                 | R0.5 A3.7 F6.0 mm |
| Rotation                 | 90.70 deg         |
| A >> P                   | 256 mm            |
| R >> L                   | 192 mm            |
| F >> H                   | 144 mm            |
| Frequency 1H             | 123.135762 MHz    |
| Correction factor        | 1                 |
| greMSMSatNS 1H           | 197.352 V         |
| Gain                     | Low               |
| Table position           | 0 mm              |
| Img. Scale. Cor.         | 1.000             |

## Physio

|                   |      |
|-------------------|------|
| 1st Signal/Mode   | None |
| Segments          | 1    |
| Tagging           | None |
| Magn. preparation | None |
| Dark blood        | Off  |
| Resp. control     | Off  |

## Inline

|                       |     |
|-----------------------|-----|
| Distortion correction | Off |
|-----------------------|-----|

## Sequence

|                       |               |
|-----------------------|---------------|
| Introduction          | Off           |
| Dimension             | 3D            |
| Elliptical scanning   | On            |
| Averaging mode        | Short term    |
| Multi-slice mode      | Interleaved   |
| Asymmetric echo       | Off           |
| Contrasts             | 1             |
| Bandwidth             | 650 Hz/Px     |
| Flow comp.            | No            |
| Allowed delay         | 0 s           |
| RO Grad Ampl.         | 43.0 mT/m     |
| RF pulse type         | Fast          |
| Gradient mode         | Fast          |
| Excitation            | Slab-sel.     |
| RF spoiling           | On            |
| Optimised MT          | On            |
| MT Flip Angle         | 600 deg       |
| MT Duration           | 15000 us      |
| MT Offset             | 100000 Hz     |
| Spoil Moment RO       | 0 us*mT/m     |
| Spoil Moment PE & SS  | 25000 us*mT/m |
| MOSAIC Mode           | None          |
| TX/RX delta frequency | 0 Hz          |
| TX Nucleus            | None          |
| TX delta frequency    | 0 Hz          |
| Coil elements         | HEA;HEP       |
| Acquisition duration  | 0 ms          |
| Mode                  | Off           |

**BOLD**

|                      |     |
|----------------------|-----|
| Subtract             | Off |
| Liver registration   | Off |
| StdDev               | Off |
| MIP-Sag              | Off |
| MIP-Cor              | Off |
| MIP-Tra              | Off |
| MIP-Time             | Off |
| Save original images | On  |
| Distortion Corr.     | Off |
| Contrasts            | 1   |
| Save original images | On  |
| Wash - In            | Off |
| Wash - Out           | Off |
| TTP                  | Off |
| PEI                  | Off |
| MIP - time           | Off |

**SIEMENS MAGNETOM Skyra syngo MR D13**

\\USER\NIB\TNU\_Clinical\NAIIMS\_VD13A\_15MAY2015\T1FA03 AX GRE  
TA:1:19 PAT:2 Voxel size:1.0×1.0×3.0 mm Rel. SNR:1.00 :fl

**Properties**

|                                 |        |
|---------------------------------|--------|
| Prio Recon                      | Off    |
| Load to viewer                  | On     |
| Inline movie                    | Off    |
| Auto store images               | On     |
| Load to stamp segments          | Off    |
| Load images to graphic segments | Off    |
| Auto open inline display        | Off    |
| Wait for user to start          | Off    |
| Start measurements              | single |

## Routine

|                    |                                      |
|--------------------|--------------------------------------|
| Nr. of slab groups | 1                                    |
| Slabs              | 1                                    |
| Dist. factor       | 20 %                                 |
| Position           | R0.5 A3.7 F6.0 mm                    |
| Orientation        | Transversal                          |
| Phase enc. dir.    | R >> L                               |
| AutoAlign          | Head > Brain                         |
| Phase oversampling | 0 %                                  |
| Slice oversampling | 0.0 %                                |
| FoV read           | 256 mm                               |
| FoV phase          | 75.0 %                               |
| Slice thickness    | 3.00 mm                              |
| TR                 | 20.0 ms                              |
| TE                 | 2.36 ms                              |
| Averages           | 1                                    |
| Concatenations     | 1                                    |
| Filter             | Prescan Normalize, Elliptical filter |
| Coil elements      | HEA;HEP                              |

## Contrast

|                   |                  |
|-------------------|------------------|
| MTC               | Off              |
| Magn. preparation | None             |
| Flip angle        | 3 deg            |
| Fat suppr.        | None             |
| Water suppr.      | None             |
| SWI               | Off              |
| Averaging mode    | Long term        |
| Measurements      | 1                |
| Reconstruction    | Magnitude        |
| Multiple series   | Each measurement |

## Resolution

|                       |            |
|-----------------------|------------|
| Base resolution       | 256        |
| Phase resolution      | 100 %      |
| Phase partial Fourier | 7/8        |
| Interpolation         | Off        |
| PAT mode              | GRAPPA     |
| Accel. factor PE      | 2          |
| Ref. lines PE         | 40         |
| Reference scan mode   | Integrated |
| Image Filter          | Off        |
| Distortion Corr.      | Off        |
| Accel. factor 3D      | 1          |
| Unfiltered images     | Off        |
| Prescan Normalize     | On         |
| Normalize             | Off        |
| B1 filter             | Off        |
| Raw filter            | Off        |
| Elliptical filter     | On         |
| Mode                  | Inplane    |
| Slice resolution      | 100 %      |
| Slice partial Fourier | 7/8        |

## Geometry

|                     |                   |
|---------------------|-------------------|
| Nr. of slab groups  | 1                 |
| Slabs               | 1                 |
| Dist. factor        | 20 %              |
| Position            | R0.5 A3.7 F6.0 mm |
| Phase enc. dir.     | R >> L            |
| Phase oversampling  | 0 %               |
| Slice oversampling  | 0.0 %             |
| Slices per slab     | 48                |
| Multi-slice mode    | Interleaved       |
| Series              | Interleaved       |
| Saturation mode     | Standard          |
| Nr. of sat. regions | 0                 |
| Position mode       | L-P-H             |
| Fat suppr.          | None              |
| Water suppr.        | None              |
| Special sat.        | None              |
| Special sat.        | None              |
| Table position      | P                 |

## System

|                          |                   |
|--------------------------|-------------------|
| Body                     | Off               |
| HEP                      | On                |
| HEA                      | On                |
| SP5                      | Off               |
| SP6                      | Off               |
| SP7                      | Off               |
| SP8                      | Off               |
| SP1                      | Off               |
| SP2                      | Off               |
| SP3                      | Off               |
| SP4                      | Off               |
| Position mode            | L-P-H             |
| Positioning mode         | FIX               |
| Table position           | H                 |
| Table position           | 0 mm              |
| MSMA                     | S - C - T         |
| Sagittal                 | R >> L            |
| Coronal                  | A >> P            |
| Transversal              | F >> H            |
| Save uncombined          | Off               |
| Coil Combine Mode        | Adaptive Combine  |
| AutoAlign                | Head > Brain      |
| Coil Select Mode         | Default           |
| Shim mode                | Standard          |
| Adjust with body coil    | Off               |
| Confirm freq. adjustment | Off               |
| Assume Dominant Fat      | Off               |
| Assume Silicone          | Off               |
| Adjustment Tolerance     | Auto              |
| ? Ref. amplitude 1H      | 0.000 V           |
| Position                 | R0.5 A3.7 F6.0 mm |
| Rotation                 | 90.70 deg         |
| A >> P                   | 256 mm            |
| R >> L                   | 192 mm            |
| F >> H                   | 144 mm            |
| Frequency 1H             | 123.135762 MHz    |
| Correction factor        | 1                 |
| SRFExcit 1H              | 36.654 V          |
| Gain                     | Low               |
| Table position           | 0 mm              |
| Img. Scale. Cor.         | 1.000             |

## Physio

|                   |      |
|-------------------|------|
| 1st Signal/Mode   | None |
| Segments          | 1    |
| Tagging           | None |
| Magn. preparation | None |
| Dark blood        | Off  |
| Resp. control     | Off  |

## Inline

|                       |     |
|-----------------------|-----|
| Distortion correction | Off |
|-----------------------|-----|

## Sequence

|                       |             |
|-----------------------|-------------|
| Introduction          | Off         |
| Dimension             | 3D          |
| Elliptical scanning   | On          |
| Averaging mode        | Long term   |
| Multi-slice mode      | Interleaved |
| Asymmetric echo       | Off         |
| Contrasts             | 1           |
| Bandwidth             | 650 Hz/Px   |
| Flow comp.            | No          |
| Allowed delay         | 0 s         |
| RF pulse type         | Fast        |
| Gradient mode         | Fast        |
| Excitation            | Slab-sel.   |
| RF spoiling           | On          |
| TX/RX delta frequency | 0 Hz        |
| TX Nucleus            | None        |
| TX delta frequency    | 0 Hz        |
| Coil elements         | HEA;HEP     |
| Acquisition duration  | 0 ms        |
| Mode                  | Off         |

**BOLD**

|                      |     |
|----------------------|-----|
| Subtract             | Off |
| Liver registration   | Off |
| StdDev               | Off |
| MIP-Sag              | Off |
| MIP-Cor              | Off |
| MIP-Tra              | Off |
| MIP-Time             | Off |
| Save original images | On  |
| Distortion Corr.     | Off |
| Contrasts            | 1   |
| Save original images | On  |
| Wash - In            | Off |
| Wash - Out           | Off |
| TTP                  | Off |
| PEI                  | Off |
| MIP - time           | Off |

**SIEMENS MAGNETOM Skyra syngo MR D13**

\\USER\NIB\TNU\_Clinical\NAIIMS\_VD13A\_15MAY2015\T1FA06 AX GRE  
TA:1:19 PAT:2 Voxel size:1.0×1.0×3.0 mm Rel. SNR:1.00 :fl

**Properties**

|                                 |        |
|---------------------------------|--------|
| Prio Recon                      | Off    |
| Load to viewer                  | On     |
| Inline movie                    | Off    |
| Auto store images               | On     |
| Load to stamp segments          | Off    |
| Load images to graphic segments | Off    |
| Auto open inline display        | Off    |
| Wait for user to start          | Off    |
| Start measurements              | single |

**Routine**

|                    |                                      |
|--------------------|--------------------------------------|
| Nr. of slab groups | 1                                    |
| Slabs              | 1                                    |
| Dist. factor       | 20 %                                 |
| Position           | R0.5 A3.7 F6.0 mm                    |
| Orientation        | Transversal                          |
| Phase enc. dir.    | R >> L                               |
| AutoAlign          | Head > Brain                         |
| Phase oversampling | 0 %                                  |
| Slice oversampling | 0.0 %                                |
| FoV read           | 256 mm                               |
| FoV phase          | 75.0 %                               |
| Slice thickness    | 3.00 mm                              |
| TR                 | 20.0 ms                              |
| TE                 | 2.36 ms                              |
| Averages           | 1                                    |
| Concatenations     | 1                                    |
| Filter             | Prescan Normalize, Elliptical filter |
| Coil elements      | HEA;HEP                              |

**Contrast**

|                   |                  |
|-------------------|------------------|
| MTC               | Off              |
| Magn. preparation | None             |
| Flip angle        | 6 deg            |
| Fat suppr.        | None             |
| Water suppr.      | None             |
| SWI               | Off              |
| Averaging mode    | Long term        |
| Measurements      | 1                |
| Reconstruction    | Magnitude        |
| Multiple series   | Each measurement |

## Resolution

|                       |            |
|-----------------------|------------|
| Base resolution       | 256        |
| Phase resolution      | 100 %      |
| Phase partial Fourier | 7/8        |
| Interpolation         | Off        |
| PAT mode              | GRAPPA     |
| Accel. factor PE      | 2          |
| Ref. lines PE         | 40         |
| Reference scan mode   | Integrated |
| Image Filter          | Off        |
| Distortion Corr.      | Off        |
| Accel. factor 3D      | 1          |
| Unfiltered images     | Off        |
| Prescan Normalize     | On         |
| Normalize             | Off        |
| B1 filter             | Off        |
| Raw filter            | Off        |
| Elliptical filter     | On         |
| Mode                  | Inplane    |
| Slice resolution      | 100 %      |
| Slice partial Fourier | 7/8        |

## Geometry

|                     |                   |
|---------------------|-------------------|
| Nr. of slab groups  | 1                 |
| Slabs               | 1                 |
| Dist. factor        | 20 %              |
| Position            | R0.5 A3.7 F6.0 mm |
| Phase enc. dir.     | R >> L            |
| Phase oversampling  | 0 %               |
| Slice oversampling  | 0.0 %             |
| Slices per slab     | 48                |
| Multi-slice mode    | Interleaved       |
| Series              | Interleaved       |
| Saturation mode     | Standard          |
| Nr. of sat. regions | 0                 |
| Position mode       | L-P-H             |
| Fat suppr.          | None              |
| Water suppr.        | None              |
| Special sat.        | None              |
| Special sat.        | None              |
| Table position      | P                 |

## System

|                          |                   |
|--------------------------|-------------------|
| Body                     | Off               |
| HEP                      | On                |
| HEA                      | On                |
| SP5                      | Off               |
| SP6                      | Off               |
| SP7                      | Off               |
| SP8                      | Off               |
| SP1                      | Off               |
| SP2                      | Off               |
| SP3                      | Off               |
| SP4                      | Off               |
| Position mode            | L-P-H             |
| Positioning mode         | FIX               |
| Table position           | H                 |
| Table position           | 0 mm              |
| MSMA                     | S - C - T         |
| Sagittal                 | R >> L            |
| Coronal                  | A >> P            |
| Transversal              | F >> H            |
| Save uncombined          | Off               |
| Coil Combine Mode        | Adaptive Combine  |
| AutoAlign                | Head > Brain      |
| Coil Select Mode         | Default           |
| Shim mode                | Standard          |
| Adjust with body coil    | Off               |
| Confirm freq. adjustment | Off               |
| Assume Dominant Fat      | Off               |
| Assume Silicone          | Off               |
| Adjustment Tolerance     | Auto              |
| ? Ref. amplitude 1H      | 0.000 V           |
| Position                 | R0.5 A3.7 F6.0 mm |
| Rotation                 | 90.70 deg         |
| A >> P                   | 256 mm            |
| R >> L                   | 192 mm            |
| F >> H                   | 144 mm            |
| Frequency 1H             | 123.135762 MHz    |
| Correction factor        | 1                 |
| SRFExcit 1H              | 73.307 V          |
| Gain                     | Low               |
| Table position           | 0 mm              |
| Img. Scale. Cor.         | 1.000             |

## Physio

|                   |      |
|-------------------|------|
| 1st Signal/Mode   | None |
| Segments          | 1    |
| Tagging           | None |
| Magn. preparation | None |
| Dark blood        | Off  |
| Resp. control     | Off  |

## Inline

|                       |     |
|-----------------------|-----|
| Distortion correction | Off |
|-----------------------|-----|

## Sequence

|                       |             |
|-----------------------|-------------|
| Introduction          | Off         |
| Dimension             | 3D          |
| Elliptical scanning   | On          |
| Averaging mode        | Long term   |
| Multi-slice mode      | Interleaved |
| Asymmetric echo       | Off         |
| Contrasts             | 1           |
| Bandwidth             | 650 Hz/Px   |
| Flow comp.            | No          |
| Allowed delay         | 0 s         |
| RF pulse type         | Fast        |
| Gradient mode         | Fast        |
| Excitation            | Slab-sel.   |
| RF spoiling           | On          |
| TX/RX delta frequency | 0 Hz        |
| TX Nucleus            | None        |
| TX delta frequency    | 0 Hz        |
| Coil elements         | HEA;HEP     |
| Acquisition duration  | 0 ms        |
| Mode                  | Off         |

**BOLD**

|                      |     |
|----------------------|-----|
| Subtract             | Off |
| Liver registration   | Off |
| StdDev               | Off |
| MIP-Sag              | Off |
| MIP-Cor              | Off |
| MIP-Tra              | Off |
| MIP-Time             | Off |
| Save original images | On  |
| Distortion Corr.     | Off |
| Contrasts            | 1   |
| Save original images | On  |
| Wash - In            | Off |
| Wash - Out           | Off |
| TTP                  | Off |
| PEI                  | Off |
| MIP - time           | Off |

**SIEMENS MAGNETOM Skyra syngo MR D13**

\\USER\NIB\TNU\_Clinical\NAIIMS\_VD13A\_15MAY2015\T1FA10 AX GRE  
TA:1:19 PAT:2 Voxel size:1.0×1.0×3.0 mm Rel. SNR:1.00 :fl

**Properties**

|                                 |        |
|---------------------------------|--------|
| Prio Recon                      | Off    |
| Load to viewer                  | On     |
| Inline movie                    | Off    |
| Auto store images               | On     |
| Load to stamp segments          | Off    |
| Load images to graphic segments | Off    |
| Auto open inline display        | Off    |
| Wait for user to start          | Off    |
| Start measurements              | single |

## Routine

|                    |                                      |
|--------------------|--------------------------------------|
| Nr. of slab groups | 1                                    |
| Slabs              | 1                                    |
| Dist. factor       | 20 %                                 |
| Position           | R0.5 A3.7 F6.0 mm                    |
| Orientation        | Transversal                          |
| Phase enc. dir.    | R >> L                               |
| AutoAlign          | Head > Brain                         |
| Phase oversampling | 0 %                                  |
| Slice oversampling | 0.0 %                                |
| FoV read           | 256 mm                               |
| FoV phase          | 75.0 %                               |
| Slice thickness    | 3.00 mm                              |
| TR                 | 20.0 ms                              |
| TE                 | 2.36 ms                              |
| Averages           | 1                                    |
| Concatenations     | 1                                    |
| Filter             | Prescan Normalize, Elliptical filter |
| Coil elements      | HEA;HEP                              |

## Contrast

|                   |                  |
|-------------------|------------------|
| MTC               | Off              |
| Magn. preparation | None             |
| Flip angle        | 10 deg           |
| Fat suppr.        | None             |
| Water suppr.      | None             |
| SWI               | Off              |
| Averaging mode    | Long term        |
| Measurements      | 1                |
| Reconstruction    | Magnitude        |
| Multiple series   | Each measurement |

## Resolution

|                       |            |
|-----------------------|------------|
| Base resolution       | 256        |
| Phase resolution      | 100 %      |
| Phase partial Fourier | 7/8        |
| Interpolation         | Off        |
| PAT mode              | GRAPPA     |
| Accel. factor PE      | 2          |
| Ref. lines PE         | 40         |
| Reference scan mode   | Integrated |
| Image Filter          | Off        |
| Distortion Corr.      | Off        |
| Accel. factor 3D      | 1          |
| Unfiltered images     | Off        |
| Prescan Normalize     | On         |
| Normalize             | Off        |
| B1 filter             | Off        |
| Raw filter            | Off        |
| Elliptical filter     | On         |
| Mode                  | Inplane    |
| Slice resolution      | 100 %      |
| Slice partial Fourier | 7/8        |

## Geometry

|                     |                   |
|---------------------|-------------------|
| Nr. of slab groups  | 1                 |
| Slabs               | 1                 |
| Dist. factor        | 20 %              |
| Position            | R0.5 A3.7 F6.0 mm |
| Phase enc. dir.     | R >> L            |
| Phase oversampling  | 0 %               |
| Slice oversampling  | 0.0 %             |
| Slices per slab     | 48                |
| Multi-slice mode    | Interleaved       |
| Series              | Interleaved       |
| Saturation mode     | Standard          |
| Nr. of sat. regions | 0                 |
| Position mode       | L-P-H             |
| Fat suppr.          | None              |
| Water suppr.        | None              |
| Special sat.        | None              |
| Special sat.        | None              |
| Table position      | P                 |

## System

|                          |                   |
|--------------------------|-------------------|
| Body                     | Off               |
| HEP                      | On                |
| HEA                      | On                |
| SP5                      | Off               |
| SP6                      | Off               |
| SP7                      | Off               |
| SP8                      | Off               |
| SP1                      | Off               |
| SP2                      | Off               |
| SP3                      | Off               |
| SP4                      | Off               |
| Position mode            | L-P-H             |
| Positioning mode         | FIX               |
| Table position           | H                 |
| Table position           | 0 mm              |
| MSMA                     | S - C - T         |
| Sagittal                 | R >> L            |
| Coronal                  | A >> P            |
| Transversal              | F >> H            |
| Save uncombined          | Off               |
| Coil Combine Mode        | Adaptive Combine  |
| AutoAlign                | Head > Brain      |
| Coil Select Mode         | Default           |
| Shim mode                | Standard          |
| Adjust with body coil    | Off               |
| Confirm freq. adjustment | Off               |
| Assume Dominant Fat      | Off               |
| Assume Silicone          | Off               |
| Adjustment Tolerance     | Auto              |
| ? Ref. amplitude 1H      | 0.000 V           |
| Position                 | R0.5 A3.7 F6.0 mm |
| Rotation                 | 90.70 deg         |
| A >> P                   | 256 mm            |
| R >> L                   | 192 mm            |
| F >> H                   | 144 mm            |
| Frequency 1H             | 123.135762 MHz    |
| Correction factor        | 1                 |
| SRFExcit 1H              | 122.178 V         |
| Gain                     | Low               |
| Table position           | 0 mm              |
| Img. Scale. Cor.         | 1.000             |

## Physio

|                   |      |
|-------------------|------|
| 1st Signal/Mode   | None |
| Segments          | 1    |
| Tagging           | None |
| Magn. preparation | None |
| Dark blood        | Off  |
| Resp. control     | Off  |

## Inline

|                       |     |
|-----------------------|-----|
| Distortion correction | Off |
|-----------------------|-----|

## Sequence

|                       |             |
|-----------------------|-------------|
| Introduction          | Off         |
| Dimension             | 3D          |
| Elliptical scanning   | On          |
| Averaging mode        | Long term   |
| Multi-slice mode      | Interleaved |
| Asymmetric echo       | Off         |
| Contrasts             | 1           |
| Bandwidth             | 650 Hz/Px   |
| Flow comp.            | No          |
| Allowed delay         | 0 s         |
| RF pulse type         | Fast        |
| Gradient mode         | Fast        |
| Excitation            | Slab-sel.   |
| RF spoiling           | On          |
| TX/RX delta frequency | 0 Hz        |
| TX Nucleus            | None        |
| TX delta frequency    | 0 Hz        |
| Coil elements         | HEA;HEP     |
| Acquisition duration  | 0 ms        |
| Mode                  | Off         |

**BOLD**

|                      |     |
|----------------------|-----|
| Subtract             | Off |
| Liver registration   | Off |
| StdDev               | Off |
| MIP-Sag              | Off |
| MIP-Cor              | Off |
| MIP-Tra              | Off |
| MIP-Time             | Off |
| Save original images | On  |
| Distortion Corr.     | Off |
| Contrasts            | 1   |
| Save original images | On  |
| Wash - In            | Off |
| Wash - Out           | Off |
| TTP                  | Off |
| PEI                  | Off |
| MIP - time           | Off |

**SIEMENS MAGNETOM Skyra syngo MR D13**

\\USER\NIB\TNU\_Clinical\NAIIMS\_VD13A\_15MAY2015\T1FA20 AX GRE  
TA:1:19 PAT:2 Voxel size:1.0×1.0×3.0 mm Rel. SNR:1.00 :fl

**Properties**

|                                 |        |
|---------------------------------|--------|
| Prio Recon                      | Off    |
| Load to viewer                  | On     |
| Inline movie                    | Off    |
| Auto store images               | On     |
| Load to stamp segments          | Off    |
| Load images to graphic segments | Off    |
| Auto open inline display        | Off    |
| Wait for user to start          | Off    |
| Start measurements              | single |

## Routine

|                    |                                      |
|--------------------|--------------------------------------|
| Nr. of slab groups | 1                                    |
| Slabs              | 1                                    |
| Dist. factor       | 20 %                                 |
| Position           | R0.5 A3.7 F6.0 mm                    |
| Orientation        | Transversal                          |
| Phase enc. dir.    | R >> L                               |
| AutoAlign          | Head > Brain                         |
| Phase oversampling | 0 %                                  |
| Slice oversampling | 0.0 %                                |
| FoV read           | 256 mm                               |
| FoV phase          | 75.0 %                               |
| Slice thickness    | 3.00 mm                              |
| TR                 | 20.0 ms                              |
| TE                 | 2.36 ms                              |
| Averages           | 1                                    |
| Concatenations     | 1                                    |
| Filter             | Prescan Normalize, Elliptical filter |
| Coil elements      | HEA;HEP                              |

## Contrast

|                   |                  |
|-------------------|------------------|
| MTC               | Off              |
| Magn. preparation | None             |
| Flip angle        | 20 deg           |
| Fat suppr.        | None             |
| Water suppr.      | None             |
| SWI               | Off              |
| Averaging mode    | Long term        |
| Measurements      | 1                |
| Reconstruction    | Magnitude        |
| Multiple series   | Each measurement |

## Resolution

|                       |            |
|-----------------------|------------|
| Base resolution       | 256        |
| Phase resolution      | 100 %      |
| Phase partial Fourier | 7/8        |
| Interpolation         | Off        |
| PAT mode              | GRAPPA     |
| Accel. factor PE      | 2          |
| Ref. lines PE         | 40         |
| Reference scan mode   | Integrated |
| Image Filter          | Off        |
| Distortion Corr.      | Off        |
| Accel. factor 3D      | 1          |
| Unfiltered images     | Off        |
| Prescan Normalize     | On         |
| Normalize             | Off        |
| B1 filter             | Off        |
| Raw filter            | Off        |
| Elliptical filter     | On         |
| Mode                  | Inplane    |
| Slice resolution      | 100 %      |
| Slice partial Fourier | 7/8        |

## Geometry

|                     |                   |
|---------------------|-------------------|
| Nr. of slab groups  | 1                 |
| Slabs               | 1                 |
| Dist. factor        | 20 %              |
| Position            | R0.5 A3.7 F6.0 mm |
| Phase enc. dir.     | R >> L            |
| Phase oversampling  | 0 %               |
| Slice oversampling  | 0.0 %             |
| Slices per slab     | 48                |
| Multi-slice mode    | Interleaved       |
| Series              | Interleaved       |
| Saturation mode     | Standard          |
| Nr. of sat. regions | 0                 |
| Position mode       | L-P-H             |
| Fat suppr.          | None              |
| Water suppr.        | None              |
| Special sat.        | None              |
| Special sat.        | None              |
| Table position      | P                 |

## System

|                          |                   |
|--------------------------|-------------------|
| Body                     | Off               |
| HEP                      | On                |
| HEA                      | On                |
| SP5                      | Off               |
| SP6                      | Off               |
| SP7                      | Off               |
| SP8                      | Off               |
| SP1                      | Off               |
| SP2                      | Off               |
| SP3                      | Off               |
| SP4                      | Off               |
| Position mode            | L-P-H             |
| Positioning mode         | FIX               |
| Table position           | H                 |
| Table position           | 0 mm              |
| MSMA                     | S - C - T         |
| Sagittal                 | R >> L            |
| Coronal                  | A >> P            |
| Transversal              | F >> H            |
| Save uncombined          | Off               |
| Coil Combine Mode        | Adaptive Combine  |
| AutoAlign                | Head > Brain      |
| Coil Select Mode         | Default           |
| Shim mode                | Standard          |
| Adjust with body coil    | Off               |
| Confirm freq. adjustment | Off               |
| Assume Dominant Fat      | Off               |
| Assume Silicone          | Off               |
| Adjustment Tolerance     | Auto              |
| ? Ref. amplitude 1H      | 0.000 V           |
| Position                 | R0.5 A3.7 F6.0 mm |
| Rotation                 | 90.70 deg         |
| A >> P                   | 256 mm            |
| R >> L                   | 192 mm            |
| F >> H                   | 144 mm            |
| Frequency 1H             | 123.135762 MHz    |
| Correction factor        | 1                 |
| SRFExcit 1H              | 244.357 V         |
| Gain                     | Low               |
| Table position           | 0 mm              |
| Img. Scale. Cor.         | 1.000             |

## Physio

|                   |      |
|-------------------|------|
| 1st Signal/Mode   | None |
| Segments          | 1    |
| Tagging           | None |
| Magn. preparation | None |
| Dark blood        | Off  |
| Resp. control     | Off  |

## Inline

|                       |     |
|-----------------------|-----|
| Distortion correction | Off |
|-----------------------|-----|

## Sequence

|                       |             |
|-----------------------|-------------|
| Introduction          | Off         |
| Dimension             | 3D          |
| Elliptical scanning   | On          |
| Averaging mode        | Long term   |
| Multi-slice mode      | Interleaved |
| Asymmetric echo       | Off         |
| Contrasts             | 1           |
| Bandwidth             | 650 Hz/Px   |
| Flow comp.            | No          |
| Allowed delay         | 0 s         |
| RF pulse type         | Fast        |
| Gradient mode         | Fast        |
| Excitation            | Slab-sel.   |
| RF spoiling           | On          |
| TX/RX delta frequency | 0 Hz        |
| TX Nucleus            | None        |
| TX delta frequency    | 0 Hz        |
| Coil elements         | HEA;HEP     |
| Acquisition duration  | 0 ms        |
| Mode                  | Off         |

**BOLD**

|                      |     |
|----------------------|-----|
| Subtract             | Off |
| Liver registration   | Off |
| StdDev               | Off |
| MIP-Sag              | Off |
| MIP-Cor              | Off |
| MIP-Tra              | Off |
| MIP-Time             | Off |
| Save original images | On  |
| Distortion Corr.     | Off |
| Contrasts            | 1   |
| Save original images | On  |
| Wash - In            | Off |
| Wash - Out           | Off |
| TTP                  | Off |
| PEI                  | Off |
| MIP - time           | Off |

**SIEMENS MAGNETOM Skyra syngo MR D13**

\\USER\NIB\TNU\_Clinical\NAIIMS\_VD13A\_15MAY2015\B0 AX GRE  
TA:0:47 PAT:2 Voxel size:2.0×2.0×3.0 mm Rel. SNR:1.00 :fl

**Properties**

|                                 |        |
|---------------------------------|--------|
| Prio Recon                      | Off    |
| Load to viewer                  | On     |
| Inline movie                    | Off    |
| Auto store images               | On     |
| Load to stamp segments          | Off    |
| Load images to graphic segments | Off    |
| Auto open inline display        | Off    |
| Wait for user to start          | Off    |
| Start measurements              | single |

## Routine

|                    |                                      |
|--------------------|--------------------------------------|
| Nr. of slab groups | 1                                    |
| Slabs              | 1                                    |
| Dist. factor       | 20 %                                 |
| Position           | R0.5 A3.7 F6.0 mm                    |
| Orientation        | Transversal                          |
| Phase enc. dir.    | R >> L                               |
| AutoAlign          | Head > Brain                         |
| Phase oversampling | 0 %                                  |
| Slice oversampling | 0.0 %                                |
| FoV read           | 256 mm                               |
| FoV phase          | 75.0 %                               |
| Slice thickness    | 3.00 mm                              |
| TR                 | 20.0 ms                              |
| TE 1               | 2.00 ms                              |
| Averages           | 1                                    |
| Concatenations     | 1                                    |
| Filter             | Prescan Normalize, Elliptical filter |
| Coil elements      | HEA;HEP                              |

## Contrast

|                   |                  |
|-------------------|------------------|
| MTC               | Off              |
| Magn. preparation | None             |
| Flip angle        | 10 deg           |
| Fat suppr.        | None             |
| Water suppr.      | None             |
| SWI               | Off              |
| Averaging mode    | Long term        |
| Measurements      | 1                |
| Reconstruction    | Magn./Phase      |
| Multiple series   | Each measurement |

## Resolution

|                       |            |
|-----------------------|------------|
| Base resolution       | 128        |
| Phase resolution      | 100 %      |
| Phase partial Fourier | 7/8        |
| Interpolation         | Off        |
| PAT mode              | GRAPPA     |
| Accel. factor PE      | 2          |
| Ref. lines PE         | 40         |
| Reference scan mode   | Integrated |
| Image Filter          | Off        |
| Distortion Corr.      | Off        |
| Accel. factor 3D      | 1          |
| Unfiltered images     | Off        |
| Prescan Normalize     | On         |
| Normalize             | Off        |
| B1 filter             | Off        |
| Raw filter            | Off        |
| Elliptical filter     | On         |
| Mode                  | Inplane    |
| Slice resolution      | 100 %      |
| Slice partial Fourier | 7/8        |

## Geometry

|                     |                   |
|---------------------|-------------------|
| Nr. of slab groups  | 1                 |
| Slabs               | 1                 |
| Dist. factor        | 20 %              |
| Position            | R0.5 A3.7 F6.0 mm |
| Phase enc. dir.     | R >> L            |
| Phase oversampling  | 0 %               |
| Slice oversampling  | 0.0 %             |
| Slices per slab     | 48                |
| Multi-slice mode    | Interleaved       |
| Series              | Interleaved       |
| Saturation mode     | Standard          |
| Nr. of sat. regions | 0                 |
| Position mode       | L-P-H             |
| Fat suppr.          | None              |
| Water suppr.        | None              |
| Special sat.        | None              |
| Special sat.        | None              |
| Table position      | P                 |

## System

|                          |                   |
|--------------------------|-------------------|
| Body                     | Off               |
| HEP                      | On                |
| HEA                      | On                |
| SP5                      | Off               |
| SP6                      | Off               |
| SP7                      | Off               |
| SP8                      | Off               |
| SP1                      | Off               |
| SP2                      | Off               |
| SP3                      | Off               |
| SP4                      | Off               |
| Position mode            | L-P-H             |
| Positioning mode         | FIX               |
| Table position           | H                 |
| Table position           | 0 mm              |
| MSMA                     | S - C - T         |
| Sagittal                 | R >> L            |
| Coronal                  | A >> P            |
| Transversal              | F >> H            |
| Save uncombined          | Off               |
| Coil Combine Mode        | Adaptive Combine  |
| AutoAlign                | Head > Brain      |
| Coil Select Mode         | Default           |
| Shim mode                | Standard          |
| Adjust with body coil    | Off               |
| Confirm freq. adjustment | Off               |
| Assume Dominant Fat      | Off               |
| Assume Silicone          | Off               |
| Adjustment Tolerance     | Auto              |
| ? Ref. amplitude 1H      | 0.000 V           |
| Position                 | R0.5 A3.7 F6.0 mm |
| Rotation                 | 90.70 deg         |
| A >> P                   | 256 mm            |
| R >> L                   | 192 mm            |
| F >> H                   | 144 mm            |
| Frequency 1H             | 123.135762 MHz    |
| Correction factor        | 1                 |
| SRFExcit 1H              | 122.178 V         |
| Gain                     | Low               |
| Table position           | 0 mm              |
| Img. Scale. Cor.         | 1.000             |

## Physio

|                   |      |
|-------------------|------|
| 1st Signal/Mode   | None |
| Segments          | 1    |
| Tagging           | None |
| Magn. preparation | None |
| Dark blood        | Off  |
| Resp. control     | Off  |

## Inline

|                       |     |
|-----------------------|-----|
| Distortion correction | Off |
|-----------------------|-----|

## Sequence

|                       |             |
|-----------------------|-------------|
| Introduction          | Off         |
| Dimension             | 3D          |
| Elliptical scanning   | On          |
| Averaging mode        | Long term   |
| Multi-slice mode      | Interleaved |
| Asymmetric echo       | Off         |
| Contrasts             | 2           |
| Bandwidth 1           | 910 Hz/Px   |
| Flow comp. 1          | No          |
| Readout mode          | Monopolar   |
| Allowed delay         | 0 s         |
| RF pulse type         | Fast        |
| Gradient mode         | Fast        |
| Excitation            | Slab-sel.   |
| RF spoiling           | On          |
| TX/RX delta frequency | 0 Hz        |
| TX Nucleus            | None        |
| TX delta frequency    | 0 Hz        |
| Coil elements         | HEA;HEP     |
| Acquisition duration  | 0 ms        |
| Mode                  | Off         |

**BOLD**

|                      |     |
|----------------------|-----|
| Subtract             | Off |
| Liver registration   | Off |
| StdDev               | Off |
| MIP-Sag              | Off |
| MIP-Cor              | Off |
| MIP-Tra              | Off |
| MIP-Time             | Off |
| Save original images | On  |
| Distortion Corr.     | Off |
| Contrasts            | 2   |
| Save original images | On  |
| Wash - In            | Off |
| Wash - Out           | Off |
| TTP                  | Off |
| PEI                  | Off |
| MIP - time           | Off |

**SIEMENS MAGNETOM Skyra syngo MR D13**

\\USER\NIBVTNU\_Clinical\NAIIMS\_VD13A\_15MAY2015\B1 AX TFL\_B1MAP  
 TA:0:21 PAT:Off Voxel size:4.0x4.0x3.0 mm Rel. SNR:1.00 :tfl

**Properties**

|                                 |        |
|---------------------------------|--------|
| Prio Recon                      | Off    |
| Load to viewer                  | On     |
| Inline movie                    | Off    |
| Auto store images               | On     |
| Load to stamp segments          | Off    |
| Load images to graphic segments | Off    |
| Auto open inline display        | Off    |
| Wait for user to start          | Off    |
| Start measurements              | single |

**Routine**

|                     |                   |
|---------------------|-------------------|
| Nr. of slice groups | 1                 |
| Slices              | 40                |
| Dist. factor        | 20 %              |
| Position            | R0.5 A3.7 F6.0 mm |
| Orientation         | Transversal       |
| Phase enc. dir.     | A >> P            |
| AutoAlign           | Head > Brain      |
| Phase oversampling  | 0 %               |
| FoV read            | 256 mm            |
| FoV phase           | 100.0 %           |
| Slice thickness     | 3.0 mm            |
| TR                  | 10200.0 ms        |
| TE                  | 2.02 ms           |
| Averages            | 1                 |
| Concatenations      | 1                 |
| Filter              | None              |
| Coil elements       | HEA;HEP           |

**Contrast**

|                   |                  |
|-------------------|------------------|
| Magn. preparation | None             |
| Flip angle        | 8 deg            |
| Fat suppr.        | None             |
| Water suppr.      | None             |
| Measurements      | 1                |
| Reconstruction    | Magnitude        |
| Multiple series   | Each measurement |

**Resolution**

|                       |       |
|-----------------------|-------|
| Base resolution       | 64    |
| Phase resolution      | 100 % |
| Phase partial Fourier | Off   |
| Interpolation         | Off   |
| PAT mode              | None  |
| Image Filter          | Off   |
| Distortion Corr.      | Off   |
| Prescan Normalize     | Off   |
| Normalize             | Off   |
| B1 filter             | Off   |
| Raw filter            | Off   |
| Elliptical filter     | Off   |

## Geometry

|                     |                   |
|---------------------|-------------------|
| Nr. of slice groups | 1                 |
| Slices              | 40                |
| Dist. factor        | 20 %              |
| Position            | R0.5 A3.7 F6.0 mm |
| Phase enc. dir.     | A >> P            |
| Phase oversampling  | 0 %               |
| Multi-slice mode    | Interleaved       |
| Series              | Interleaved       |
| Nr. of sat. regions | 0                 |
| Position mode       | L-P-H             |
| Fat suppr.          | None              |
| Water suppr.        | None              |
| Special sat.        | None              |
| Table position      | P                 |

## System

|                          |                |
|--------------------------|----------------|
| Body                     | Off            |
| HEP                      | On             |
| HEA                      | On             |
| SP5                      | Off            |
| SP6                      | Off            |
| SP7                      | Off            |
| SP8                      | Off            |
| SP1                      | Off            |
| SP2                      | Off            |
| SP3                      | Off            |
| SP4                      | Off            |
| Position mode            | L-P-H          |
| Positioning mode         | FIX            |
| Table position           | H              |
| Table position           | 0 mm           |
| MSMA                     | S - C - T      |
| Sagittal                 | R >> L         |
| Coronal                  | A >> P         |
| Transversal              | F >> H         |
| Save uncombined          | Off            |
| Coil Combine Mode        | Sum of Squares |
| AutoAlign                | Head > Brain   |
| Coil Select Mode         | Default        |
| Shim mode                | Tune up        |
| Adjust with body coil    | Off            |
| Confirm freq. adjustment | Off            |
| Assume Dominant Fat      | Off            |
| Assume Silicone          | Off            |
| Adjustment Tolerance     | Auto           |
| ? Ref. amplitude 1H      | 0.000 V        |
| Position                 | Isocenter      |
| Rotation                 | 0.00 deg       |
| R >> L                   | 350 mm         |
| A >> P                   | 263 mm         |
| F >> H                   | 350 mm         |
| Frequency 1H             | 123.135762 MHz |
| Correction factor        | 1              |
| Prep_SINC 1H             | 621.738 V      |
| Gain                     | High           |
| Table position           | 0 mm           |
| Img. Scale. Cor.         | 1.000          |

**Physio**

|                   |      |
|-------------------|------|
| Magn. preparation | None |
|-------------------|------|

**Inline**

|                       |     |
|-----------------------|-----|
| Distortion correction | Off |
|-----------------------|-----|

**Sequence**

|                       |             |
|-----------------------|-------------|
| Introduction          | Off         |
| Dimension             | 2D          |
| Multi-slice mode      | Interleaved |
| Asymmetric echo       | Allowed     |
| Bandwidth             | 750 Hz/Px   |
| Flow comp.            | No          |
| Echo spacing          | 3.9 ms      |
| Turbo factor          | 64          |
| RF pulse type         | Low SAR     |
| Gradient mode         | Normal      |
| Excitation            | Slice-sel.  |
| RF spoiling           | On          |
| TX/RX delta frequency | 0 Hz        |
| TX Nucleus            | None        |
| TX delta frequency    | 0 Hz        |
| Coil elements         | HEA;HEP     |
| Acquisition duration  | 0 ms        |
| Mode                  | Off         |

**BOLD**

|                      |     |
|----------------------|-----|
| Subtract             | Off |
| StdDev               | Off |
| MIP-Sag              | Off |
| MIP-Cor              | Off |
| MIP-Tra              | Off |
| MIP-Time             | Off |
| Save original images | On  |
| Distortion Corr.     | Off |
| Save original images | On  |

**SIEMENS MAGNETOM Skyra syngo MR D13**

|                                                                                                                  |
|------------------------------------------------------------------------------------------------------------------|
| \\USER\NIB\TNU_Clinical\NAIIMS_VD13A_15MAY2015\B1 AX RF_MAP<br>TA:1:09 Voxel size:4.0x4.0x5.0 mm Rel. SNR:1.00 : |
|------------------------------------------------------------------------------------------------------------------|

## Properties

|                                 |        |
|---------------------------------|--------|
| Prio Recon                      | Off    |
| Load to viewer                  | On     |
| Inline movie                    | Off    |
| Auto store images               | On     |
| Load to stamp segments          | Off    |
| Load images to graphic segments | Off    |
| Auto open inline display        | Off    |
| Wait for user to start          | Off    |
| Start measurements              | single |

## Routine

|                     |                   |
|---------------------|-------------------|
| Nr. of slice groups | 1                 |
| Slices              | 24                |
| Dist. factor        | 120 %             |
| Position            | R0.5 A3.7 F6.0 mm |
| Orientation         | Transversal       |
| Phase enc. dir.     | A >> P            |
| AutoAlign           | Head > Brain      |
| FoV read            | 256 mm            |
| FoV phase           | 100.0 %           |
| Slice thickness     | 5 mm              |
| TR                  | 1000 ms           |
| TE 1                | 14 ms             |
| Averages            | 1                 |
| Filter              | None              |
| Coil elements       | HEA;HEP           |

## Contrast

|              |        |
|--------------|--------|
| Flip angle 1 | 90 deg |
| Measurements | 1      |

## Resolution

|                   |       |
|-------------------|-------|
| Base resolution   | 64    |
| Phase resolution  | 100 % |
| Image Filter      | Off   |
| Distortion Corr.  | Off   |
| Prescan Normalize | Off   |
| Normalize         | Off   |
| B1 filter         | Off   |
| Raw filter        | Off   |
| Elliptical filter | Off   |

Geometry

|                     |                   |
|---------------------|-------------------|
| Nr. of slice groups | 1                 |
| Slices              | 24                |
| Dist. factor        | 120 %             |
| Position            | R0.5 A3.7 F6.0 mm |
| Phase enc. dir.     | A >> P            |
| Series              | Interleaved       |
| Nr. of sat. regions | 0                 |
| Position mode       | L-P-H             |
| Special sat.        | None              |
| Table position      | P                 |

## System

|                          |                  |
|--------------------------|------------------|
| Body                     | Off              |
| HEP                      | On               |
| HEA                      | On               |
| SP5                      | Off              |
| SP6                      | Off              |
| SP7                      | Off              |
| SP8                      | Off              |
| SP1                      | Off              |
| SP2                      | Off              |
| SP3                      | Off              |
| SP4                      | Off              |
| Position mode            | L-P-H            |
| Positioning mode         | FIX              |
| Table position           | H                |
| Table position           | 0 mm             |
| MSMA                     | S - C - T        |
| Sagittal                 | R >> L           |
| Coronal                  | A >> P           |
| Transversal              | F >> H           |
| Save uncombined          | Off              |
| Coil Combine Mode        | Adaptive Combine |
| AutoAlign                | Head > Brain     |
| Coil Select Mode         | Default          |
| Shim mode                | Tune up          |
| Adjust with body coil    | Off              |
| Confirm freq. adjustment | Off              |
| Assume Dominant Fat      | Off              |
| Assume Silicone          | Off              |
| Adjustment Tolerance     | Auto             |
| ? Ref. amplitude 1H      | 0.000 V          |
| Position                 | Isocenter        |
| Rotation                 | 0.00 deg         |
| R >> L                   | 350 mm           |
| A >> P                   | 263 mm           |
| F >> H                   | 350 mm           |
| Frequency 1H             | 123.135762 MHz   |
| Correction factor        | 1                |
| sTX01 1H                 | 220.504 V        |
| Gain                     | Low              |
| Table position           | 0 mm             |
| Img. Scale. Cor.         | 1.000            |

**Physio****Inline**

|                       |     |
|-----------------------|-----|
| Distortion correction | Off |
|-----------------------|-----|

**Sequence**

|                       |                  |
|-----------------------|------------------|
| Contrasts             | 2                |
| Bandwidth             | 260.416667 Hz/Px |
| T1 Compensation       | 0.0 ms           |
| Angles                | 1                |
| BC Excitation Mode    | Auto             |
| TX/RX delta frequency | 0 Hz             |
| TX Nucleus            | None             |
| TX delta frequency    | 0 Hz             |
| Coil elements         | HEA;HEP          |
| Acquisition duration  | 0 ms             |
| Mode                  | Off              |

**BOLD**

|                  |     |
|------------------|-----|
| Distortion Corr. | Off |
| Contrasts        | 2   |

**SIEMENS MAGNETOM Skyra syngo MR D13**

|                                                                                                                                  |
|----------------------------------------------------------------------------------------------------------------------------------|
| \\USER\NIB\TNU_Clinical\NAIIMS_VD13A_15MAY2015\fmRI AX CMRRMBEPI<br>TA:6:00 PAT:2 Voxel size:2.0x2.0x2.0 mm Rel. SNR:1.00 :epfid |
|----------------------------------------------------------------------------------------------------------------------------------|

**Properties**

|                                 |        |
|---------------------------------|--------|
| Prio Recon                      | Off    |
| Load to viewer                  | On     |
| Inline movie                    | Off    |
| Auto store images               | On     |
| Load to stamp segments          | Off    |
| Load images to graphic segments | Off    |
| Auto open inline display        | Off    |
| Wait for user to start          | Off    |
| Start measurements              | single |

**Routine**

|                          |                               |
|--------------------------|-------------------------------|
| Nr. of slice groups      | 1                             |
| Slices                   | 60                            |
| Dist. factor             | 0 %                           |
| Position                 | R0.5 A3.8 H5.5 mm             |
| Orientation              | Transversal                   |
| Phase enc. dir.          | A >> P                        |
| AutoAlign                | Head > Brain                  |
| Phase oversampling       | 0 %                           |
| FoV read                 | 220 mm                        |
| FoV phase                | 100.0 %                       |
| Slice thickness          | 2.00 mm                       |
| TR                       | 1000 ms                       |
| TE                       | 30.00 ms                      |
| Multi-band accel. factor | 4                             |
| Filter                   | Raw filter, Prescan Normalize |
| Coil elements            | HEA;HEP                       |

**Contrast**

|                   |           |
|-------------------|-----------|
| MTC               | Off       |
| Magn. preparation | None      |
| Flip angle        | 55 deg    |
| Fat suppr.        | Fat sat.  |
| Averaging mode    | Long term |
| Measurements      | 340       |
| Delay in TR       | 0 ms      |
| Reconstruction    | Magnitude |
| Multiple series   | Off       |

## Resolution

|                       |             |
|-----------------------|-------------|
| Base resolution       | 110         |
| Phase resolution      | 100 %       |
| Phase partial Fourier | Off         |
| Interpolation         | Off         |
| PAT mode              | GRAPPA      |
| Accel. factor PE      | 2           |
| Ref. lines PE         | 24          |
| Reference scan mode   | Single-shot |
| Distortion Corr.      | Off         |
| Hamming               | Off         |
| Prescan Normalize     | On          |
| Raw filter            | On          |
| Intensity             | Weak        |
| Slope                 | 25          |
| Elliptical filter     | Off         |

## Geometry

|                     |                   |
|---------------------|-------------------|
| Nr. of slice groups | 1                 |
| Slices              | 60                |
| Dist. factor        | 0 %               |
| Position            | R0.5 A3.8 H5.5 mm |
| Phase enc. dir.     | A >> P            |
| Phase oversampling  | 0 %               |
| Multi-slice mode    | Interleaved       |
| Series              | Interleaved       |
| Nr. of sat. regions | 0                 |
| Position mode       | L-P-H             |
| Fat suppr.          | Fat sat.          |
| Special sat.        | None              |
| Special sat.        | None              |
| Table position      | P                 |

## System

|                          |                   |
|--------------------------|-------------------|
| Body                     | Off               |
| HEP                      | On                |
| HEA                      | On                |
| SP5                      | Off               |
| SP6                      | Off               |
| SP7                      | Off               |
| SP8                      | Off               |
| SP1                      | Off               |
| SP2                      | Off               |
| SP3                      | Off               |
| SP4                      | Off               |
| Position mode            | L-P-H             |
| Positioning mode         | FIX               |
| Table position           | H                 |
| Table position           | 0 mm              |
| MSMA                     | S - C - T         |
| Sagittal                 | R >> L            |
| Coronal                  | A >> P            |
| Transversal              | F >> H            |
| Coil Combine Mode        | Sum of Squares    |
| AutoAlign                | Head > Brain      |
| Coil Select Mode         | Default           |
| Shim mode                | Standard          |
| Adjust with body coil    | Off               |
| Confirm freq. adjustment | Off               |
| Assume Dominant Fat      | Off               |
| Assume Silicone          | Off               |
| Adjustment Tolerance     | Auto              |
| ? Ref. amplitude 1H      | 0.000 V           |
| Position                 | R0.5 A3.8 H5.5 mm |
| Rotation                 | 0.70 deg          |
| R >> L                   | 220 mm            |
| A >> P                   | 220 mm            |
| F >> H                   | 120 mm            |
| Frequency 1H             | 123.135762 MHz    |
| Correction factor        | 1                 |
| MBExc 1H                 | 544.084 V         |
| Gain                     | High              |
| Table position           | 0 mm              |
| Img. Scale. Cor.         | 1.000             |

**Physio**

|                   |      |
|-------------------|------|
| 1st Signal/Mode   | None |
| Magn. preparation | None |

**Inline**

|                       |     |
|-----------------------|-----|
| Distortion correction | Off |
|-----------------------|-----|

**Sequence**

|                          |             |
|--------------------------|-------------|
| Introduction             | Off         |
| Averaging mode           | Long term   |
| Multi-slice mode         | Interleaved |
| Bandwidth                | 1748 Hz/Px  |
| Flow comp.               | No          |
| Free echo spacing        | Off         |
| Echo spacing             | 0.68 ms     |
| EPI factor               | 110         |
| Gradient mode            | Fast        |
| RF spoiling              | Off         |
| Online multi-band recon. | Online      |
| Triggering scheme        | Standard    |
| TX/RX delta frequency    | 0 Hz        |
| TX Nucleus               | None        |
| TX delta frequency       | 0 Hz        |
| Coil elements            | HEA;HEP     |
| Acquisition duration     | 0 ms        |

**BOLD**

|                         |      |
|-------------------------|------|
| GLM Statistics          | Off  |
| Dynamic t-maps          | Off  |
| Ignore meas. at start   | 0    |
| Ignore after transition | 0    |
| Model transition states | On   |
| Temp. highpass filter   | On   |
| Threshold               | 4.00 |
| Paradigm size           | 3    |
| Motion correction       | Off  |
| Spatial filter          | Off  |
| Delay in TR             | 0 ms |
| Distortion Corr.        | Off  |

**SIEMENS MAGNETOM Skyra syngo MR D13**

\\USER\NIBVTNU\_Clinical\NAIIMS\_VD13A\_15MAY2015\fmRI XPhase CMRRMBEPI  
TA:0:30 PAT:2 Voxel size:2.0x2.0x2.0 mm Rel. SNR:1.00 :epfid

## Properties

|                                 |        |
|---------------------------------|--------|
| Prio Recon                      | Off    |
| Load to viewer                  | On     |
| Inline movie                    | Off    |
| Auto store images               | On     |
| Load to stamp segments          | Off    |
| Load images to graphic segments | Off    |
| Auto open inline display        | Off    |
| Wait for user to start          | Off    |
| Start measurements              | single |

## Routine

|                          |                               |
|--------------------------|-------------------------------|
| Nr. of slice groups      | 1                             |
| Slices                   | 60                            |
| Dist. factor             | 0 %                           |
| Position                 | R0.5 A3.8 H5.5 mm             |
| Orientation              | Transversal                   |
| Phase enc. dir.          | P >> A                        |
| AutoAlign                | Head > Brain                  |
| Phase oversampling       | 0 %                           |
| FoV read                 | 220 mm                        |
| FoV phase                | 100.0 %                       |
| Slice thickness          | 2.00 mm                       |
| TR                       | 1000 ms                       |
| TE                       | 30.00 ms                      |
| Multi-band accel. factor | 4                             |
| Filter                   | Raw filter, Prescan Normalize |
| Coil elements            | HEA;HEP                       |

## Contrast

|                   |           |
|-------------------|-----------|
| MTC               | Off       |
| Magn. preparation | None      |
| Flip angle        | 55 deg    |
| Fat suppr.        | Fat sat.  |
| Averaging mode    | Long term |
| Measurements      | 10        |
| Delay in TR       | 0 ms      |
| Reconstruction    | Magnitude |
| Multiple series   | Off       |

## Resolution

|                       |             |
|-----------------------|-------------|
| Base resolution       | 110         |
| Phase resolution      | 100 %       |
| Phase partial Fourier | Off         |
| Interpolation         | Off         |
| PAT mode              | GRAPPA      |
| Accel. factor PE      | 2           |
| Ref. lines PE         | 24          |
| Reference scan mode   | Single-shot |
| Distortion Corr.      | Off         |
| Hamming               | Off         |
| Prescan Normalize     | On          |
| Raw filter            | On          |
| Intensity             | Weak        |
| Slope                 | 25          |
| Elliptical filter     | Off         |

## Geometry

|                     |                   |
|---------------------|-------------------|
| Nr. of slice groups | 1                 |
| Slices              | 60                |
| Dist. factor        | 0 %               |
| Position            | R0.5 A3.8 H5.5 mm |
| Phase enc. dir.     | P >> A            |
| Phase oversampling  | 0 %               |
| Multi-slice mode    | Interleaved       |
| Series              | Interleaved       |
| Nr. of sat. regions | 0                 |
| Position mode       | L-P-H             |
| Fat suppr.          | Fat sat.          |
| Special sat.        | None              |
| Special sat.        | None              |
| Table position      | P                 |

## System

|                          |                   |
|--------------------------|-------------------|
| Body                     | Off               |
| HEP                      | On                |
| HEA                      | On                |
| SP5                      | Off               |
| SP6                      | Off               |
| SP7                      | Off               |
| SP8                      | Off               |
| SP1                      | Off               |
| SP2                      | Off               |
| SP3                      | Off               |
| SP4                      | Off               |
| Position mode            | L-P-H             |
| Positioning mode         | FIX               |
| Table position           | H                 |
| Table position           | 0 mm              |
| MSMA                     | S - C - T         |
| Sagittal                 | R >> L            |
| Coronal                  | A >> P            |
| Transversal              | F >> H            |
| Coil Combine Mode        | Sum of Squares    |
| AutoAlign                | Head > Brain      |
| Coil Select Mode         | Default           |
| Shim mode                | Standard          |
| Adjust with body coil    | Off               |
| Confirm freq. adjustment | Off               |
| Assume Dominant Fat      | Off               |
| Assume Silicone          | Off               |
| Adjustment Tolerance     | Auto              |
| ? Ref. amplitude 1H      | 0.000 V           |
| Position                 | R0.5 A3.8 H5.5 mm |
| Rotation                 | -179.30 deg       |
| R >> L                   | 220 mm            |
| A >> P                   | 220 mm            |
| F >> H                   | 120 mm            |
| Frequency 1H             | 123.135762 MHz    |
| Correction factor        | 1                 |
| MBExc 1H                 | 544.084 V         |
| Gain                     | High              |
| Table position           | 0 mm              |
| Img. Scale. Cor.         | 1.000             |

|                   |  |      |
|-------------------|--|------|
| <b>Physio</b>     |  |      |
| 1st Signal/Mode   |  | None |
| Magn. preparation |  | None |

|                       |  |     |
|-----------------------|--|-----|
| <b>Inline</b>         |  |     |
| Distortion correction |  | Off |

|                          |  |             |
|--------------------------|--|-------------|
| <b>Sequence</b>          |  |             |
| Introduction             |  | Off         |
| Averaging mode           |  | Long term   |
| Multi-slice mode         |  | Interleaved |
| Bandwidth                |  | 1748 Hz/Px  |
| Flow comp.               |  | No          |
| Free echo spacing        |  | Off         |
| Echo spacing             |  | 0.68 ms     |
| EPI factor               |  | 110         |
| Gradient mode            |  | Fast        |
| RF spoiling              |  | Off         |
| Online multi-band recon. |  | Online      |
| Triggering scheme        |  | Standard    |
| TX/RX delta frequency    |  | 0 Hz        |
| TX Nucleus               |  | None        |
| TX delta frequency       |  | 0 Hz        |
| Coil elements            |  | HEA;HEP     |
| Acquisition duration     |  | 0 ms        |

|                         |  |      |
|-------------------------|--|------|
| <b>BOLD</b>             |  |      |
| GLM Statistics          |  | Off  |
| Dynamic t-maps          |  | Off  |
| Ignore meas. at start   |  | 0    |
| Ignore after transition |  | 0    |
| Model transition states |  | On   |
| Temp. highpass filter   |  | On   |
| Threshold               |  | 4.00 |
| Paradigm size           |  | 3    |
| Motion correction       |  | Off  |
| Spatial filter          |  | Off  |
| Delay in TR             |  | 0 ms |
| Distortion Corr.        |  | Off  |

### SIEMENS MAGNETOM Skyra syngo MR D13

\\USER\NIB\TNU\_Clinical\NAIIMS\_VD13A\_15MAY2015\DTI AX CMRRMBEPI  
TA:4:52 PAT:2 Voxel size:2.2x2.2x2.2 mm Rel. SNR:1.00 :epse

## Properties

|                                 |        |
|---------------------------------|--------|
| Prio Recon                      | Off    |
| Load to viewer                  | On     |
| Inline movie                    | Off    |
| Auto store images               | On     |
| Load to stamp segments          | Off    |
| Load images to graphic segments | Off    |
| Auto open inline display        | Off    |
| Wait for user to start          | Off    |
| Start measurements              | single |

## Routine

|                          |                               |
|--------------------------|-------------------------------|
| Nr. of slice groups      | 1                             |
| Slices                   | 66                            |
| Dist. factor             | 0 %                           |
| Position                 | Isocenter                     |
| Orientation              | Transversal                   |
| Phase enc. dir.          | A >> P                        |
| AutoAlign                | ---                           |
| Phase oversampling       | 0 %                           |
| FoV read                 | 220 mm                        |
| FoV phase                | 100.0 %                       |
| Slice thickness          | 2.20 mm                       |
| TR                       | 4300 ms                       |
| TE                       | 96.00 ms                      |
| Multi-band accel. factor | 2                             |
| Filter                   | Raw filter, Prescan Normalize |
| Coil elements            | HEA;HEP                       |

## Contrast

|                       |           |
|-----------------------|-----------|
| MTC                   | Off       |
| Magn. preparation     | None      |
| Flip angle            | 90 deg    |
| Fat suppr.            | Fat sat.  |
| Grad. rev. fat suppr. | Enabled   |
| Averaging mode        | Long term |
| Measurements          | 1         |
| Delay in TR           | 0 ms      |
| Reconstruction        | Magnitude |
| Multiple series       | Off       |

## Resolution

|                       |             |
|-----------------------|-------------|
| Base resolution       | 100         |
| Phase resolution      | 100 %       |
| Phase partial Fourier | 7/8         |
| Interpolation         | Off         |
| PAT mode              | GRAPPA      |
| Accel. factor PE      | 2           |
| Ref. lines PE         | 30          |
| Reference scan mode   | Single-shot |
| Distortion Corr.      | Off         |
| Prescan Normalize     | On          |
| Raw filter            | On          |
| Intensity             | Weak        |
| Slope                 | 25          |
| Elliptical filter     | Off         |
| Dynamic Field Corr.   | Off         |

## Geometry

|                       |             |
|-----------------------|-------------|
| Nr. of slice groups   | 1           |
| Slices                | 66          |
| Dist. factor          | 0 %         |
| Position              | Isocenter   |
| Phase enc. dir.       | A >> P      |
| Phase oversampling    | 0 %         |
| Multi-slice mode      | Interleaved |
| Series                | Interleaved |
| Nr. of sat. regions   | 0           |
| Position mode         | L-P-H       |
| Fat suppr.            | Fat sat.    |
| Special sat.          | None        |
| Grad. rev. fat suppr. | Enabled     |
| Special sat.          | None        |
| Table position        | P           |

## System

|                          |                |
|--------------------------|----------------|
| Body                     | Off            |
| HEP                      | On             |
| HEA                      | On             |
| SP5                      | Off            |
| SP6                      | Off            |
| SP7                      | Off            |
| SP8                      | Off            |
| SP1                      | Off            |
| SP2                      | Off            |
| SP3                      | Off            |
| SP4                      | Off            |
| Position mode            | L-P-H          |
| Positioning mode         | REF            |
| Table position           | H              |
| Table position           | 0 mm           |
| MSMA                     | S - C - T      |
| Sagittal                 | R >> L         |
| Coronal                  | A >> P         |
| Transversal              | F >> H         |
| Coil Combine Mode        | Sum of Squares |
| AutoAlign                | ---            |
| Coil Select Mode         | Default        |
| Shim mode                | Standard       |
| Adjust with body coil    | Off            |
| Confirm freq. adjustment | Off            |
| Assume Dominant Fat      | Off            |
| Assume Silicone          | Off            |
| Adjustment Tolerance     | Auto           |
| ? Ref. amplitude 1H      | 0.000 V        |
| Position                 | Isocenter      |
| Rotation                 | 0.00 deg       |
| R >> L                   | 220 mm         |
| A >> P                   | 220 mm         |
| F >> H                   | 146 mm         |
| Frequency 1H             | 123.135762 MHz |
| Correction factor        | 1              |
| AddCSaCSatNS 1H          | 106.000 V      |
| Gain                     | High           |
| Table position           | 0 mm           |
| Img. Scale. Cor.         | 1.000          |

**Physio**

|                   |      |
|-------------------|------|
| 1st Signal/Mode   | None |
| Magn. preparation | None |
| Resp. control     | Off  |

**Inline**

|                       |     |
|-----------------------|-----|
| Distortion correction | Off |
|-----------------------|-----|

**Sequence**

|                          |             |
|--------------------------|-------------|
| Introduction             | Off         |
| Averaging mode           | Long term   |
| Multi-slice mode         | Interleaved |
| Bandwidth                | 1924 Hz/Px  |
| Free echo spacing        | Off         |
| Echo spacing             | 0.63 ms     |
| EPI factor               | 100         |
| Gradient mode            | Fast*       |
| RF spoiling              | Off         |
| Online multi-band recon. | Online      |
| TX/RX delta frequency    | 0 Hz        |
| TX Nucleus               | None        |
| TX delta frequency       | 0 Hz        |
| Coil elements            | HEA;HEP     |
| Acquisition duration     | 0 ms        |

**BOLD**

|                       |                     |
|-----------------------|---------------------|
| Delay in TR           | 0 ms                |
| Diffusion mode        | Free                |
| Diff. weightings      | 2                   |
| b-value 1             | 0 s/mm <sup>2</sup> |
| Diff. weighted images | On                  |
| Trace weighted images | On                  |
| ADC maps              | On                  |
| FA maps               | On                  |
| Mosaic                | On                  |
| Tensor                | On                  |
| Distortion Corr.      | Off                 |
| b-Value >=            | 0 s/mm <sup>2</sup> |
| Exponential ADC Maps  | Off                 |
| Invert Gray Scale     | Off                 |
| Calculated Image      | Off                 |

**SIEMENS MAGNETOM Skyra syngo MR D13**

\\USER\NIB\TNU\_Clinical\NAIIMS\_VD13A\_15MAY2015\DTI XPhase CMRRMBEPI  
TA:4:52 PAT:2 Voxel size:2.2x2.2x2.2 mm Rel. SNR:1.00 :epse

### Properties

|                                 |        |
|---------------------------------|--------|
| Prio Recon                      | Off    |
| Load to viewer                  | On     |
| Inline movie                    | Off    |
| Auto store images               | On     |
| Load to stamp segments          | Off    |
| Load images to graphic segments | Off    |
| Auto open inline display        | Off    |
| Wait for user to start          | Off    |
| Start measurements              | single |

### Routine

|                          |                               |
|--------------------------|-------------------------------|
| Nr. of slice groups      | 1                             |
| Slices                   | 66                            |
| Dist. factor             | 0 %                           |
| Position                 | Isocenter                     |
| Orientation              | Transversal                   |
| Phase enc. dir.          | P >> A                        |
| AutoAlign                | ---                           |
| Phase oversampling       | 0 %                           |
| FoV read                 | 220 mm                        |
| FoV phase                | 100.0 %                       |
| Slice thickness          | 2.20 mm                       |
| TR                       | 4300 ms                       |
| TE                       | 96.00 ms                      |
| Multi-band accel. factor | 2                             |
| Filter                   | Raw filter, Prescan Normalize |
| Coil elements            | HEA;HEP                       |

### Contrast

|                       |           |
|-----------------------|-----------|
| MTC                   | Off       |
| Magn. preparation     | None      |
| Flip angle            | 90 deg    |
| Fat suppr.            | Fat sat.  |
| Grad. rev. fat suppr. | Enabled   |
| Averaging mode        | Long term |
| Measurements          | 1         |
| Delay in TR           | 0 ms      |
| Reconstruction        | Magnitude |
| Multiple series       | Off       |

## Resolution

|                       |             |
|-----------------------|-------------|
| Base resolution       | 100         |
| Phase resolution      | 100 %       |
| Phase partial Fourier | 7/8         |
| Interpolation         | Off         |
| PAT mode              | GRAPPA      |
| Accel. factor PE      | 2           |
| Ref. lines PE         | 30          |
| Reference scan mode   | Single-shot |
| Distortion Corr.      | Off         |
| Prescan Normalize     | On          |
| Raw filter            | On          |
| Intensity             | Weak        |
| Slope                 | 25          |
| Elliptical filter     | Off         |
| Dynamic Field Corr.   | Off         |

## Geometry

|                       |             |
|-----------------------|-------------|
| Nr. of slice groups   | 1           |
| Slices                | 66          |
| Dist. factor          | 0 %         |
| Position              | Isocenter   |
| Phase enc. dir.       | P >> A      |
| Phase oversampling    | 0 %         |
| Multi-slice mode      | Interleaved |
| Series                | Interleaved |
| Nr. of sat. regions   | 0           |
| Position mode         | L-P-H       |
| Fat suppr.            | Fat sat.    |
| Special sat.          | None        |
| Grad. rev. fat suppr. | Enabled     |
| Special sat.          | None        |
| Table position        | P           |

## System

|                          |                |
|--------------------------|----------------|
| Body                     | Off            |
| HEP                      | On             |
| HEA                      | On             |
| SP5                      | Off            |
| SP6                      | Off            |
| SP7                      | Off            |
| SP8                      | Off            |
| SP1                      | Off            |
| SP2                      | Off            |
| SP3                      | Off            |
| SP4                      | Off            |
| Position mode            | L-P-H          |
| Positioning mode         | FIX            |
| Table position           | H              |
| Table position           | 0 mm           |
| MSMA                     | S - C - T      |
| Sagittal                 | R >> L         |
| Coronal                  | A >> P         |
| Transversal              | F >> H         |
| Coil Combine Mode        | Sum of Squares |
| AutoAlign                | ---            |
| Coil Select Mode         | Default        |
| Shim mode                | Standard       |
| Adjust with body coil    | Off            |
| Confirm freq. adjustment | Off            |
| Assume Dominant Fat      | Off            |
| Assume Silicone          | Off            |
| Adjustment Tolerance     | Auto           |
| ? Ref. amplitude 1H      | 0.000 V        |
| Position                 | Isocenter      |
| Rotation                 | 180.00 deg     |
| R >> L                   | 220 mm         |
| A >> P                   | 220 mm         |
| F >> H                   | 146 mm         |
| Frequency 1H             | 123.135762 MHz |
| Correction factor        | 1              |
| AddCSaCSatNS 1H          | 106.000 V      |
| Gain                     | High           |
| Table position           | 0 mm           |
| Img. Scale. Cor.         | 1.000          |

**Physio**

|                   |      |
|-------------------|------|
| 1st Signal/Mode   | None |
| Magn. preparation | None |
| Resp. control     | Off  |

**Inline**

|                       |     |
|-----------------------|-----|
| Distortion correction | Off |
|-----------------------|-----|

**Sequence**

|                          |             |
|--------------------------|-------------|
| Introduction             | Off         |
| Averaging mode           | Long term   |
| Multi-slice mode         | Interleaved |
| Bandwidth                | 1924 Hz/Px  |
| Free echo spacing        | Off         |
| Echo spacing             | 0.63 ms     |
| EPI factor               | 100         |
| Gradient mode            | Fast*       |
| RF spoiling              | Off         |
| Online multi-band recon. | Online      |
| TX/RX delta frequency    | 0 Hz        |
| TX Nucleus               | None        |
| TX delta frequency       | 0 Hz        |
| Coil elements            | HEA;HEP     |
| Acquisition duration     | 0 ms        |

**BOLD**

|                       |                     |
|-----------------------|---------------------|
| Delay in TR           | 0 ms                |
| Diffusion mode        | Free                |
| Diff. weightings      | 2                   |
| b-value 1             | 0 s/mm <sup>2</sup> |
| Diff. weighted images | On                  |
| Trace weighted images | On                  |
| ADC maps              | On                  |
| FA maps               | On                  |
| Mosaic                | On                  |
| Tensor                | On                  |
| Distortion Corr.      | Off                 |
| b-Value >=            | 0 s/mm <sup>2</sup> |
| Exponential ADC Maps  | Off                 |
| Invert Gray Scale     | Off                 |
| Calculated Image      | Off                 |

**SIEMENS MAGNETOM Skyra syngo MR D13**

## Table of contents

```

\USER
| NIB
| | TNU_Clinical
| | | NAIIMS_VD13A_15MAY2015
| | | | AAHScout_32ch
| | | | MPRAGE SAG TFL
| | | | T2 SAG TSE
| | | | FLAIR SAG VFL
| | | | PDT2 AX TSE
| | | | PSIR AX TSE
| | | | MTC4k AX WIP805
| | | | MTC100k AX WIP805
| | | | T1FA03 AX GRE
| | | | T1FA06 AX GRE
| | | | T1FA10 AX GRE
| | | | T1FA20 AX GRE
| | | | B0 AX GRE
| | | | B1 AX TFL_B1MAP
| | | | B1 AX RF_MAP
| | | | fMRI AX CMRRMBEPI
| | | | fMRI XPhase CMRRMBEPI
| | | | DTI AX CMRRMBEPI
| | | | DTI XPhase CMRRMBEPI

```

|                      |     |
|----------------------|-----|
| Std-Dev-Cor          | Off |
| Std-Dev-Tra          | Off |
| Std-Dev-Time         | Off |
| MIP-Sag              | Off |
| MIP-Cor              | Off |
| MIP-Tra              | Off |
| MIP-Time             | Off |
| Save original images | On  |

---

|            |     |
|------------|-----|
| Wash - In  | Off |
| Wash - Out | Off |
| TTP        | Off |
| PEI        | Off |
| MIP - time | Off |

#### Sequence

---

|                     |           |
|---------------------|-----------|
| Introduction        | On        |
| Dimension           | 2D        |
| Phase stabilisation | Off       |
| Asymmetric echo     | Off       |
| Contrasts           | 1         |
| Bandwidth           | 180 Hz/Px |
| Flow comp.          | No        |
| Allowed delay       | 0 s       |

---

|               |            |
|---------------|------------|
| RF pulse type | Normal     |
| Gradient mode | Fast       |
| Excitation    | Slice-sel. |
| RF spoiling   | On         |

## SIEMENS MAGNETOM TrioTim syngo MR B17

\\USER\Rooney\NAIMS\V17\_20150527\t2\_haste\_Triplanar\_loc

TA: 0:21 PAT: Off Voxel size: 1.2x0.9x5.0 mm Rel. SNR: 1.00 SIEMENS: haste

## Properties

|                                               |        |
|-----------------------------------------------|--------|
| Prio Recon                                    | Off    |
| Before measurement                            |        |
| After measurement                             |        |
| Load to viewer                                | On     |
| Inline movie                                  | Off    |
| Auto store images                             | On     |
| Load to stamp segments                        | Off    |
| Load images to graphic segments               | Off    |
| Auto open inline display                      | Off    |
| Start measurement without further preparation | On     |
| Wait for user to start                        | On     |
| Start measurements                            | single |

## Routine

|                    |                              |
|--------------------|------------------------------|
| Slice group 1      |                              |
| Slices             | 5                            |
| Dist. factor       | 300 %                        |
| Position           | R3.7 A27.7 H10.7             |
| Orientation        | T > C-12.7                   |
| Phase enc. dir.    | R >> L                       |
| Rotation           | 90.00 deg                    |
| Slice group 2      |                              |
| Slices             | 5                            |
| Dist. factor       | 100 %                        |
| Position           | R4.1 A5.1 H13.1              |
| Orientation        | C > T8.7                     |
| Phase enc. dir.    | R >> L                       |
| Rotation           | 0.00 deg                     |
| Slice group 3      |                              |
| Slices             | 3                            |
| Dist. factor       | 300 %                        |
| Position           | L0.3 A39.5 H14.4             |
| Orientation        | S > T0.6                     |
| Phase enc. dir.    | A >> P                       |
| Rotation           | 0.00 deg                     |
| Phase oversampling | 0 %                          |
| FoV read           | 240 mm                       |
| FoV phase          | 100.0 %                      |
| Slice thickness    | 5.0 mm                       |
| TR                 | 1500 ms                      |
| TE                 | 78 ms                        |
| Averages           | 1                            |
| Concatenations     | 1                            |
| Filter             | Normalize, Elliptical filter |
| Coil elements      | HEA;HEP                      |

## Contrast

|                   |                  |
|-------------------|------------------|
| MTC               | Off              |
| Magn. preparation | None             |
| Flip angle        | 150 deg          |
| Fat suppr.        | None             |
| Water suppr.      | None             |
| Restore magn.     | Off              |
| -----             |                  |
| Averaging mode    | Long term        |
| Reconstruction    | Magnitude        |
| Measurements      | 1                |
| Multiple series   | Each measurement |

## Resolution

|                  |      |
|------------------|------|
| Base resolution  | 256  |
| Phase resolution | 80 % |

|                       |           |
|-----------------------|-----------|
| Phase partial Fourier | 5/8       |
| Interpolation         | Off       |
| -----                 |           |
| PAT mode              | None      |
| Matrix Coil Mode      | Auto (CP) |
| -----                 |           |
| Image Filter          | Off       |
| Distortion Corr.      | Off       |
| Prescan Normalize     | Off       |
| Normalize             | On        |
| Intensity             | Medium    |
| Cut off               | 20        |
| Width                 | 4         |
| Unfiltered images     | Off       |
| B1 filter             | Off       |
| Raw filter            | Off       |
| Elliptical filter     | On        |
| Mode                  | Inplane   |

## Geometry

|                  |             |
|------------------|-------------|
| Multi-slice mode | Single shot |
| Series           | Interleaved |
| -----            |             |
| Special sat.     | None        |
| -----            |             |
| Tim CT mode      | Off         |

## System

|                          |                  |
|--------------------------|------------------|
| Body                     | Off              |
| HEP                      | On               |
| HEA                      | On               |
| -----                    |                  |
| Positioning mode         | REF              |
| Table position           | H                |
| Table position           | 0 mm             |
| MSMA                     | S - C - T        |
| Sagittal                 | R >> L           |
| Coronal                  | A >> P           |
| Transversal              | F >> H           |
| Save uncombined          | Off              |
| Coil Combine Mode        | Adaptive Combine |
| AutoAlign                | ---              |
| Auto Coil Select         | Default          |
| -----                    |                  |
| Shim mode                | Tune up          |
| Adjust with body coil    | Off              |
| Confirm freq. adjustment | Off              |
| Assume Silicone          | Off              |
| ? Ref. amplitude 1H      | 0.000 V          |
| Adjustment Tolerance     | Auto             |
| Adjust volume            |                  |
| Position                 | Isocenter        |
| Orientation              | Transversal      |
| Rotation                 | 0.00 deg         |
| R >> L                   | 350 mm           |
| A >> P                   | 263 mm           |
| F >> H                   | 350 mm           |

## Physio

|                 |      |
|-----------------|------|
| 1st Signal/Mode | None |
| -----           |      |
| Dark blood      | Off  |
| -----           |      |
| Resp. control   | Off  |

## Inline

|             |     |
|-------------|-----|
| Subtract    | Off |
| Std-Dev-Sag | Off |
| Std-Dev-Cor | Off |

## SIEMENS MAGNETOM TrioTim syngo MR B17

|                      |     |
|----------------------|-----|
| Std-Dev-Tra          | Off |
| Std-Dev-Time         | Off |
| MIP-Sag              | Off |
| MIP-Cor              | Off |
| MIP-Tra              | Off |
| MIP-Time             | Off |
| Save original images | On  |

## Sequence

|               |           |
|---------------|-----------|
| Introduction  | On        |
| Dimension     | 2D        |
| Contrasts     | 1         |
| Bandwidth     | 592 Hz/Px |
| Flow comp.    | No        |
| Allowed delay | 30 s      |
| Echo spacing  | 4.58 ms   |
| -----         |           |
| Turbo factor  | 205       |
| RF pulse type | Fast      |
| Gradient mode | Fast      |

## SIEMENS MAGNETOM TrioTim syngo MR B17

\\USER\Rooney\NAIMS\V17\_20150527\T1\_MPRAGE\_sag\_p2\_TI900 (OHSU 2)

TA: 4:18 PAT: 2 Voxel size: 1.0x1.0x1.0 mm Rel. SNR: 1.00 SIEMENS: tfl

## Properties

|                                               |        |
|-----------------------------------------------|--------|
| Prio Recon                                    | Off    |
| Before measurement                            |        |
| After measurement                             |        |
| Load to viewer                                | On     |
| Inline movie                                  | Off    |
| Auto store images                             | On     |
| Load to stamp segments                        | Off    |
| Load images to graphic segments               | Off    |
| Auto open inline display                      | Off    |
| Start measurement without further preparation | On     |
| Wait for user to start                        | On     |
| Start measurements                            | single |

## Routine

|                    |                               |
|--------------------|-------------------------------|
| Slab group 1       |                               |
| Slabs              | 1                             |
| Dist. factor       | 50 %                          |
| Position           | R1.0 A34.1 H11.2              |
| Orientation        | S > T-1.9 > C-0.3             |
| Phase enc. dir.    | A >> P                        |
| Rotation           | 0.00 deg                      |
| Phase oversampling | 0 %                           |
| Slice oversampling | 0.0 %                         |
| Slices per slab    | 176                           |
| FoV read           | 250 mm                        |
| FoV phase          | 100.0 %                       |
| Slice thickness    | 1.00 mm                       |
| TR                 | 1900 ms                       |
| TE                 | 2.52 ms                       |
| Averages           | 1                             |
| Concatenations     | 1                             |
| Filter             | Raw filter, Prescan Normalize |
| Coil elements      | HEA;HEP                       |

## Contrast

|                   |                  |
|-------------------|------------------|
| Magn. preparation | Non-sel. IR      |
| T1                | 900 ms           |
| Flip angle        | 9 deg            |
| Fat suppr.        | None             |
| Water suppr.      | None             |
| Averaging mode    | Long term        |
| Reconstruction    | Magnitude        |
| Measurements      | 1                |
| Multiple series   | Each measurement |

## Resolution

|                       |               |
|-----------------------|---------------|
| Base resolution       | 256           |
| Phase resolution      | 96 %          |
| Slice resolution      | 100 %         |
| Phase partial Fourier | Off           |
| Slice partial Fourier | Off           |
| Interpolation         | Off           |
| PAT mode              | GRAPPA        |
| Accel. factor PE      | 2             |
| Ref. lines PE         | 24            |
| Accel. factor 3D      | 1             |
| Matrix Coil Mode      | Auto (Triple) |
| Reference scan mode   | Integrated    |
| Image Filter          | Off           |
| Distortion Corr.      | Off           |

|                   |      |
|-------------------|------|
| Unfiltered images | Off  |
| Prescan Normalize | On   |
| Normalize         | Off  |
| B1 filter         | Off  |
| Raw filter        | On   |
| Intensity         | Weak |
| Slope             | 25   |
| Elliptical filter | Off  |

## Geometry

|                  |             |
|------------------|-------------|
| Multi-slice mode | Single shot |
| Series           | Ascending   |

## System

|                          |                   |
|--------------------------|-------------------|
| Body                     | Off               |
| HEP                      | On                |
| HEA                      | On                |
| Positioning mode         | FIX               |
| Table position           | H                 |
| Table position           | 0 mm              |
| MSMA                     | S - C - T         |
| Sagittal                 | R >> L            |
| Coronal                  | A >> P            |
| Transversal              | F >> H            |
| Save uncombined          | Off               |
| Coil Combine Mode        | Adaptive Combine  |
| AutoAlign                | ---               |
| Auto Coil Select         | Default           |
| Shim mode                | Standard          |
| Adjust with body coil    | On                |
| Confirm freq. adjustment | Off               |
| Assume Silicone          | Off               |
| ? Ref. amplitude 1H      | 0.000 V           |
| Adjustment Tolerance     | Auto              |
| Adjust volume            |                   |
| Position                 | R1.0 A34.1 H11.2  |
| Orientation              | S > T-1.9 > C-0.3 |
| Rotation                 | 0.00 deg          |
| F >> H                   | 250 mm            |
| A >> P                   | 250 mm            |
| R >> L                   | 176 mm            |

## Physio

|                 |      |
|-----------------|------|
| 1st Signal/Mode | None |
| Dark blood      | Off  |
| Resp. control   | Off  |

## Inline

|                      |     |
|----------------------|-----|
| Subtract             | Off |
| Std-Dev-Sag          | Off |
| Std-Dev-Cor          | Off |
| Std-Dev-Tra          | Off |
| Std-Dev-Time         | Off |
| MIP-Sag              | Off |
| MIP-Cor              | Off |
| MIP-Tra              | Off |
| MIP-Time             | Off |
| Save original images | On  |

## Sequence

|                     |         |
|---------------------|---------|
| Introduction        | On      |
| Dimension           | 3D      |
| Elliptical scanning | Off     |
| Asymmetric echo     | Allowed |

SIEMENS MAGNETOM TrioTim syngo MR B17

|               |           |
|---------------|-----------|
| Bandwidth     | 170 Hz/Px |
| Flow comp.    | No        |
| Echo spacing  | 7.6 ms    |
| -----         |           |
| RF pulse type | Normal    |
| Gradient mode | Normal    |
| Excitation    | Non-sel.  |
| RF spoiling   | On        |

## SIEMENS MAGNETOM TrioTim syngo MR B17

\\USER\Rooney\NAIMS\V17\_20150527\T2\_3D\_sag\_p2\_iso

TA: 4:43 PAT: 2 Voxel size: 1.0x1.0x1.0 mm Rel. SNR: 1.00 SIEMENS: tse\_vfl

## Properties

|                                               |        |
|-----------------------------------------------|--------|
| Prio Recon                                    | Off    |
| Before measurement                            |        |
| After measurement                             |        |
| Load to viewer                                | On     |
| Inline movie                                  | Off    |
| Auto store images                             | On     |
| Load to stamp segments                        | Off    |
| Load images to graphic segments               | Off    |
| Auto open inline display                      | Off    |
| Start measurement without further preparation | On     |
| Wait for user to start                        | Off    |
| Start measurements                            | single |

## Routine

|                    |                               |
|--------------------|-------------------------------|
| Slab group 1       |                               |
| Slabs              | 1                             |
| Position           | R1.0 A34.1 H11.2              |
| Orientation        | S > T-1.9 > C-0.3             |
| Phase enc. dir.    | A >> P                        |
| Rotation           | 0.00 deg                      |
| Phase oversampling | 0 %                           |
| Slice oversampling | 0.0 %                         |
| Slices per slab    | 176                           |
| FoV read           | 256 mm                        |
| FoV phase          | 100.0 %                       |
| Slice thickness    | 1.00 mm                       |
| TR                 | 3200 ms                       |
| TE                 | 408 ms                        |
| Averages           | 1.0                           |
| Concatenations     | 1                             |
| Filter             | Raw filter, Prescan Normalize |
| Coil elements      | HEA;HEP                       |

## Contrast

|                   |                  |
|-------------------|------------------|
| MTC               | Off              |
| Magn. preparation | None             |
| Fat suppr.        | None             |
| Water suppr.      | None             |
| Restore magn.     | Off              |
| Reconstruction    | Magnitude        |
| Measurements      | 1                |
| Multiple series   | Each measurement |

## Resolution

|                       |               |
|-----------------------|---------------|
| Base resolution       | 256           |
| Phase resolution      | 101 %         |
| Slice resolution      | 100 %         |
| Phase partial Fourier | Allowed       |
| Slice partial Fourier | Off           |
| Interpolation         | On            |
| PAT mode              | GRAPPA        |
| Accel. factor PE      | 2             |
| Ref. lines PE         | 24            |
| Accel. factor 3D      | 1             |
| Matrix Coil Mode      | Auto (Triple) |
| Reference scan mode   | Integrated    |
| Image Filter          | Off           |
| Distortion Corr.      | Off           |
| Unfiltered images     | Off           |
| Prescan Normalize     | On            |

|                   |      |
|-------------------|------|
| Normalize         | Off  |
| B1 filter         | Off  |
| Raw filter        | On   |
| Intensity         | Weak |
| Slope             | 25   |
| Elliptical filter | Off  |

## Geometry

|              |      |
|--------------|------|
| Special sat. | None |
|--------------|------|

## System

|                          |                   |
|--------------------------|-------------------|
| Body                     | Off               |
| HEP                      | On                |
| HEA                      | On                |
| Positioning mode         | FIX               |
| Table position           | H                 |
| Table position           | 0 mm              |
| MSMA                     | S - C - T         |
| Sagittal                 | R >> L            |
| Coronal                  | A >> P            |
| Transversal              | F >> H            |
| Save uncombined          | Off               |
| Coil Combine Mode        | Sum of Squares    |
| AutoAlign                | ---               |
| Auto Coil Select         | Default           |
| Shim mode                | Standard          |
| Adjust with body coil    | Off               |
| Confirm freq. adjustment | Off               |
| Assume Silicone          | Off               |
| ? Ref. amplitude 1H      | 0.000 V           |
| Adjustment Tolerance     | Auto              |
| Adjust volume            |                   |
| ! Position               | R1.0 A34.1 H11.2  |
| ! Orientation            | S > T-1.9 > C-0.3 |
| ! Rotation               | 0.00 deg          |
| ! F >> H                 | 250 mm            |
| ! A >> P                 | 250 mm            |
| ! R >> L                 | 176 mm            |

## Physio

|                 |      |
|-----------------|------|
| 1st Signal/Mode | None |
| Dark blood      | Off  |
| Resp. control   | Off  |

## Inline

|                      |     |
|----------------------|-----|
| Subtract             | Off |
| Std-Dev-Sag          | Off |
| Std-Dev-Cor          | Off |
| Std-Dev-Tra          | Off |
| Std-Dev-Time         | Off |
| MIP-Sag              | Off |
| MIP-Cor              | Off |
| MIP-Tra              | Off |
| MIP-Time             | Off |
| Save original images | On  |

## Sequence

|               |           |
|---------------|-----------|
| Introduction  | On        |
| Dimension     | 3D        |
| Bandwidth     | 751 Hz/Px |
| Flow comp.    | No        |
| Allowed delay | 30 s      |
| Echo spacing  | 3.36 ms   |

SIEMENS MAGNETOM TrioTim syngo MR B17

|                       |             |
|-----------------------|-------------|
| Adiabatic-mode        | Off         |
| -----                 |             |
| Define                | Echo trains |
| Turbo factor          | 141         |
| Slice turbo factor    | 2           |
| Echo trains per slice | 1           |
| Echo train duration   | 877         |
| RF pulse type         | Normal      |
| Gradient mode         | Fast        |
| Excitation            | Non-sel.    |
| Flip angle mode       | T2 var      |

## SIEMENS MAGNETOM TrioTim syngo MR B17

\\USER\Rooney\NAIMS\V17\_20150527\T2 3D FLAIR sag\_p2\_iso

TA: 7:02 PAT: 2 Voxel size: 1.0x1.0x1.0 mm Rel. SNR: 1.00 SIEMENS: tse\_vfl

## Properties

|                                               |        |
|-----------------------------------------------|--------|
| Prio Recon                                    | Off    |
| Before measurement                            |        |
| After measurement                             |        |
| Load to viewer                                | On     |
| Inline movie                                  | Off    |
| Auto store images                             | On     |
| Load to stamp segments                        | Off    |
| Load images to graphic segments               | Off    |
| Auto open inline display                      | Off    |
| Start measurement without further preparation | On     |
| Wait for user to start                        | On     |
| Start measurements                            | single |

## Routine

|                    |                               |
|--------------------|-------------------------------|
| Slab group 1       |                               |
| Slabs              | 1                             |
| Position           | R1.0 A34.1 H11.2              |
| Orientation        | S > T-1.9 > C-0.3             |
| Phase enc. dir.    | A >> P                        |
| Rotation           | 0.00 deg                      |
| Phase oversampling | 0 %                           |
| Slice oversampling | 0.0 %                         |
| Slices per slab    | 176                           |
| FoV read           | 256 mm                        |
| FoV phase          | 100.0 %                       |
| Slice thickness    | 1.00 mm                       |
| TR                 | 4800 ms                       |
| TE                 | 355 ms                        |
| Averages           | 1.0                           |
| Concatenations     | 1                             |
| Filter             | Raw filter, Prescan Normalize |
| Coil elements      | HEA;HEP                       |

## Contrast

|                   |                  |
|-------------------|------------------|
| MTC               | Off              |
| Magn. preparation | Non-sel. IR      |
| TI                | 1800 ms          |
| Fat suppr.        | Fat sat.         |
| Fat sat. mode     | Strong           |
| Water suppr.      | None             |
| Restore magn.     | Off              |
| Reconstruction    | Magnitude        |
| Measurements      | 1                |
| Multiple series   | Each measurement |

## Resolution

|                       |               |
|-----------------------|---------------|
| Base resolution       | 256           |
| Phase resolution      | 101 %         |
| Slice resolution      | 100 %         |
| Phase partial Fourier | Allowed       |
| Slice partial Fourier | Off           |
| Interpolation         | On            |
| PAT mode              | GRAPPA        |
| Accel. factor PE      | 2             |
| Ref. lines PE         | 40            |
| Accel. factor 3D      | 1             |
| Matrix Coil Mode      | Auto (Triple) |
| Reference scan mode   | Integrated    |
| Image Filter          | Off           |
| Distortion Corr.      | Off           |

|                   |      |
|-------------------|------|
| Unfiltered images | Off  |
| Prescan Normalize | On   |
| Normalize         | Off  |
| B1 filter         | Off  |
| Raw filter        | On   |
| Intensity         | Weak |
| Slope             | 25   |
| Elliptical filter | Off  |

## Geometry

|              |      |
|--------------|------|
| Special sat. | None |
|--------------|------|

## System

|                          |                   |
|--------------------------|-------------------|
| Body                     | Off               |
| HEP                      | On                |
| HEA                      | On                |
| Positioning mode         | FIX               |
| Table position           | H                 |
| Table position           | 0 mm              |
| MSMA                     | S - C - T         |
| Sagittal                 | R >> L            |
| Coronal                  | A >> P            |
| Transversal              | F >> H            |
| Save uncombined          | Off               |
| Coil Combine Mode        | Adaptive Combine  |
| AutoAlign                | ---               |
| Auto Coil Select         | On                |
| Shim mode                | Standard          |
| Adjust with body coil    | Off               |
| Confirm freq. adjustment | Off               |
| Assume Silicone          | Off               |
| ? Ref. amplitude 1H      | 0.000 V           |
| Adjustment Tolerance     | Auto              |
| Adjust volume            |                   |
| ! Position               | R1.0 A34.1 H11.2  |
| ! Orientation            | S > T-1.9 > C-0.3 |
| ! Rotation               | 0.00 deg          |
| ! F >> H                 | 250 mm            |
| ! A >> P                 | 250 mm            |
| ! R >> L                 | 176 mm            |

## Physio

|                 |      |
|-----------------|------|
| 1st Signal/Mode | None |
| Dark blood      | Off  |
| Resp. control   | Off  |

## Inline

|                      |     |
|----------------------|-----|
| Subtract             | Off |
| Std-Dev-Sag          | Off |
| Std-Dev-Cor          | Off |
| Std-Dev-Tra          | Off |
| Std-Dev-Time         | Off |
| MIP-Sag              | Off |
| MIP-Cor              | Off |
| MIP-Tra              | Off |
| MIP-Time             | Off |
| Save original images | On  |

## Sequence

|              |           |
|--------------|-----------|
| Introduction | Off       |
| Dimension    | 3D        |
| Bandwidth    | 781 Hz/Px |
| Flow comp.   | No        |

## SIEMENS MAGNETOM TrioTim syngo MR B17

|                |        |
|----------------|--------|
| Allowed delay  | 30 s   |
| Echo spacing   | 3.3 ms |
| Adiabatic-mode | Off    |

---

|                       |             |
|-----------------------|-------------|
| Define                | Echo trains |
| Turbo factor          | 149         |
| Slice turbo factor    | 2           |
| Echo trains per slice | 1           |
| Echo train duration   | 842         |
| RF pulse type         | Normal      |
| Gradient mode         | Fast        |
| Excitation            | Non-sel.    |
| Flip angle mode       | T2 var      |

## SIEMENS MAGNETOM TrioTim syngo MR B17

\\USER\Rooney\NAIMS\17\_20150527\PD,T2 2D TSE tra

TA: 2:15 PAT: 3 Voxel size: 0.9x0.9x3.0 mm Rel. SNR: 1.00 SIEMENS: tse

## Properties

|                                               |        |
|-----------------------------------------------|--------|
| Prio Recon                                    | Off    |
| Before measurement                            |        |
| After measurement                             |        |
| Load to viewer                                | On     |
| Inline movie                                  | Off    |
| Auto store images                             | On     |
| Load to stamp segments                        | Off    |
| Load images to graphic segments               | Off    |
| Auto open inline display                      | Off    |
| Start measurement without further preparation | On     |
| Wait for user to start                        | On     |
| Start measurements                            | single |

## Routine

|                    |                                      |
|--------------------|--------------------------------------|
| Slice group 1      |                                      |
| Slices             | 54                                   |
| Dist. factor       | 0 %                                  |
| Position           | R1.1 A25.6 H28.5                     |
| Orientation        | T > C-9.3 > S1.0                     |
| Phase enc. dir.    | R >> L                               |
| Rotation           | 88.90 deg                            |
| Phase oversampling | 0 %                                  |
| FoV read           | 240 mm                               |
| FoV phase          | 90.6 %                               |
| Slice thickness    | 3.0 mm                               |
| TR                 | 3000 ms                              |
| TE 1               | 11 ms                                |
| TE 2               | 101 ms                               |
| Averages           | 1                                    |
| Concatenations     | 3                                    |
| Filter             | Prescan Normalize, Elliptical filter |
| Coil elements      | HEA;HEP                              |

## Contrast

|                   |           |
|-------------------|-----------|
| TD                | 0.0 ms    |
| MTC               | Off       |
| Magn. preparation | None      |
| Flip angle        | 150 deg   |
| Fat suppr.        | None      |
| Water suppr.      | None      |
| Restore magn.     | Off       |
| Averaging mode    | Long term |
| Reconstruction    | Magnitude |
| Measurements      | 1         |
| Multiple series   | Off       |

## Resolution

|                       |               |
|-----------------------|---------------|
| Base resolution       | 256           |
| Phase resolution      | 100 %         |
| Phase partial Fourier | Off           |
| Trajectory            | Cartesian     |
| Interpolation         | Off           |
| PAT mode              | GRAPPA        |
| Accel. factor PE      | 3             |
| Ref. lines PE         | 32            |
| Matrix Coil Mode      | Auto (Triple) |
| Reference scan mode   | Integrated    |
| Image Filter          | Off           |
| Distortion Corr.      | Off           |

|                   |         |
|-------------------|---------|
| Unfiltered images | Off     |
| Prescan Normalize | On      |
| Normalize         | Off     |
| B1 filter         | Off     |
| Raw filter        | Off     |
| Elliptical filter | On      |
| Mode              | Inplane |

## Geometry

|                  |             |
|------------------|-------------|
| Multi-slice mode | Interleaved |
| Series           | Interleaved |
| Special sat.     | None        |
| Tim CT mode      | Off         |

## System

|                          |                   |
|--------------------------|-------------------|
| Body                     | Off               |
| HEP                      | On                |
| HEA                      | On                |
| Positioning mode         | FIX               |
| Table position           | H                 |
| Table position           | 0 mm              |
| MSMA                     | S - C - T         |
| Sagittal                 | R >> L            |
| Coronal                  | A >> P            |
| Transversal              | F >> H            |
| Save uncombined          | Off               |
| Coil Combine Mode        | Adaptive Combine  |
| AutoAlign                | ---               |
| Auto Coil Select         | Default           |
| Shim mode                | Standard          |
| Adjust with body coil    | Off               |
| Confirm freq. adjustment | Off               |
| Assume Silicone          | Off               |
| ? Ref. amplitude 1H      | 0.000 V           |
| Adjustment Tolerance     | Auto              |
| Adjust volume            |                   |
| ! Position               | R1.0 A34.1 H11.2  |
| ! Orientation            | S > T-1.9 > C-0.3 |
| ! Rotation               | 0.00 deg          |
| ! F >> H                 | 250 mm            |
| ! A >> P                 | 250 mm            |
| ! R >> L                 | 176 mm            |

## Physio

|                 |      |
|-----------------|------|
| 1st Signal/Mode | None |
| Dark blood      | Off  |
| Resp. control   | Off  |

## Inline

|                      |     |
|----------------------|-----|
| Subtract             | Off |
| Std-Dev-Sag          | Off |
| Std-Dev-Cor          | Off |
| Std-Dev-Tra          | Off |
| Std-Dev-Time         | Off |
| MIP-Sag              | Off |
| MIP-Cor              | Off |
| MIP-Tra              | Off |
| MIP-Time             | Off |
| Save original images | On  |

## Sequence

|              |     |
|--------------|-----|
| Introduction | Off |
|--------------|-----|

## SIEMENS MAGNETOM TrioTim syngo MR B17

|                       |              |
|-----------------------|--------------|
| Dimension             | 2D           |
| Compensate T2 decay   | Off          |
| Reduce Motion Sens.   | Off          |
| Contrasts             | 2            |
| Bandwidth             | 186 Hz/Px    |
| Flow comp.            | No           |
| Allowed delay         | 30 s         |
| Echo spacing          | 11.2 ms      |
| -----                 |              |
| Define                | Turbo factor |
| Turbo factor          | 7            |
| Echo trains per slice | 14           |
| RF pulse type         | Low SAR      |
| Gradient mode         | Normal       |

## SIEMENS MAGNETOM TrioTim syngo MR B17

\USER\Rooney\NAIMS\17\_20150527\2D PSIR

TA: 7:00 PAT: Off Voxel size: 0.7x0.6x2.0 mm Rel. SNR: 1.00 SIEMENS: tse

## Properties

|                                               |        |
|-----------------------------------------------|--------|
| Prio Recon                                    | Off    |
| Before measurement                            |        |
| After measurement                             |        |
| Load to viewer                                | On     |
| Inline movie                                  | Off    |
| Auto store images                             | On     |
| Load to stamp segments                        | Off    |
| Load images to graphic segments               | Off    |
| Auto open inline display                      | Off    |
| Start measurement without further preparation | On     |
| Wait for user to start                        | Off    |
| Start measurements                            | single |

## Routine

|                    |                               |
|--------------------|-------------------------------|
| Slice group 1      |                               |
| Slices             | 45                            |
| Dist. factor       | 0 %                           |
| Position           | Isocenter                     |
| Orientation        | Transversal                   |
| Phase enc. dir.    | R >> L                        |
| Rotation           | 90.00 deg                     |
| Phase oversampling | 0 %                           |
| FoV read           | 220 mm                        |
| FoV phase          | 78.1 %                        |
| Slice thickness    | 2.0 mm                        |
| TR                 | 5000 ms                       |
| TE                 | 13 ms                         |
| Averages           | 1                             |
| Concatenations     | 2                             |
| Filter             | Raw filter, Prescan Normalize |
| Coil elements      | HEA;HEP                       |

## Contrast

|                          |               |
|--------------------------|---------------|
| TD                       | 0.0 ms        |
| MTC                      | Off           |
| Magn. preparation        | Slice-sel. IR |
| TI                       | 499 ms        |
| Freeze suppressed tissue | Off           |
| Flip angle               | 150 deg       |
| Fat suppr.               | None          |
| Water suppr.             | None          |
| Restore magn.            | Off           |
| Averaging mode           | Long term     |
| Reconstruction           | Real          |
| Measurements             | 1             |
| Multiple series          | Off           |

## Resolution

|                       |           |
|-----------------------|-----------|
| Base resolution       | 384       |
| Phase resolution      | 81 %      |
| Phase partial Fourier | Off       |
| Trajectory            | Cartesian |
| Interpolation         | Off       |
| PAT mode              | None      |
| Matrix Coil Mode      | Auto (CP) |
| Image Filter          | Off       |
| Distortion Corr.      | Off       |
| Unfiltered images     | Off       |
| Prescan Normalize     | On        |
| Normalize             | Off       |

|                   |        |
|-------------------|--------|
| B1 filter         | Off    |
| Raw filter        | On     |
| Intensity         | Medium |
| Slope             | 48     |
| Elliptical filter | Off    |

## Geometry

|                  |             |
|------------------|-------------|
| Multi-slice mode | Interleaved |
| Series           | Interleaved |
| Special sat.     | None        |
| Tim CT mode      | Off         |

## System

|                          |                  |
|--------------------------|------------------|
| Body                     | Off              |
| HEP                      | On               |
| HEA                      | On               |
| Positioning mode         | REF              |
| Table position           | H                |
| Table position           | 0 mm             |
| MSMA                     | S - C - T        |
| Sagittal                 | R >> L           |
| Coronal                  | A >> P           |
| Transversal              | F >> H           |
| Save uncombined          | Off              |
| Coil Combine Mode        | Adaptive Combine |
| AutoAlign                | ---              |
| Auto Coil Select         | Default          |
| Shim mode                | Standard         |
| Adjust with body coil    | Off              |
| Confirm freq. adjustment | Off              |
| Assume Silicone          | Off              |
| ? Ref. amplitude 1H      | 0.000 V          |
| Adjustment Tolerance     | Auto             |
| Adjust volume            |                  |
| Position                 | Isocenter        |
| Orientation              | Transversal      |
| Rotation                 | 90.00 deg        |
| A >> P                   | 220 mm           |
| R >> L                   | 172 mm           |
| F >> H                   | 90 mm            |

## Physio

|                 |      |
|-----------------|------|
| 1st Signal/Mode | None |
| Dark blood      | Off  |
| Resp. control   | Off  |

## Inline

|                      |     |
|----------------------|-----|
| Subtract             | Off |
| Std-Dev-Sag          | Off |
| Std-Dev-Cor          | Off |
| Std-Dev-Tra          | Off |
| Std-Dev-Time         | Off |
| MIP-Sag              | Off |
| MIP-Cor              | Off |
| MIP-Tra              | Off |
| MIP-Time             | Off |
| Save original images | On  |

## Sequence

|                     |     |
|---------------------|-----|
| Introduction        | Off |
| Dimension           | 2D  |
| Compensate T2 decay | Off |

## SIEMENS MAGNETOM TrioTim syngo MR B17

|                       |              |
|-----------------------|--------------|
| Reduce Motion Sens.   | On           |
| Contrasts             | 1            |
| Bandwidth             | 228 Hz/Px    |
| Flow comp.            | Slice        |
| Allowed delay         | 60 s         |
| Echo spacing          | 12.7 ms      |
| -----                 |              |
| Define                | Turbo factor |
| Turbo factor          | 6            |
| Echo trains per slice | 41           |
| RF pulse type         | Low SAR      |
| Gradient mode         | Fast         |

## SIEMENS MAGNETOM TrioTim syngo MR B17

\\USER\Rooney\NAIMS\17\_20150527\gre\_wip805\_MT\_32ch\_FA600\_d4kHz

TA: 2:45 PAT: 2 Voxel size: 1.0x1.0x3.0 mm Rel. SNR: 1.00 USER: gre\_wip805

## Properties

|                                               |        |
|-----------------------------------------------|--------|
| Prio Recon                                    | Off    |
| Before measurement                            |        |
| After measurement                             |        |
| Load to viewer                                | On     |
| Inline movie                                  | Off    |
| Auto store images                             | On     |
| Load to stamp segments                        | Off    |
| Load images to graphic segments               | Off    |
| Auto open inline display                      | Off    |
| Start measurement without further preparation | On     |
| Wait for user to start                        | On     |
| Start measurements                            | single |

## Routine

|                    |                   |
|--------------------|-------------------|
| Slab group 1       |                   |
| Slabs              | 1                 |
| Dist. factor       | 20 %              |
| Position           | R1.1 A25.6 H28.5  |
| Orientation        | T > C-9.3 > S1.0  |
| Phase enc. dir.    | R >> L            |
| Rotation           | 88.90 deg         |
| Phase oversampling | 0 %               |
| Slice oversampling | 0.0 %             |
| Slices per slab    | 48                |
| FoV read           | 256 mm            |
| FoV phase          | 75.0 %            |
| Slice thickness    | 3.00 mm           |
| TR                 | 43 ms             |
| TE                 | 2.30 ms           |
| Averages           | 1                 |
| Concatenations     | 1                 |
| Filter             | Prescan Normalize |
| Coil elements      | HEA;HEP           |

## Contrast

|                   |                  |
|-------------------|------------------|
| MTC               | On               |
| Magn. preparation | None             |
| Flip angle        | 10 deg           |
| Fat suppr.        | None             |
| Water suppr.      | None             |
| Averaging mode    | Short term       |
| Reconstruction    | Magn./Phase      |
| Measurements      | 1                |
| Multiple series   | Each measurement |

## Resolution

|                       |               |
|-----------------------|---------------|
| Base resolution       | 256           |
| Phase resolution      | 100 %         |
| Slice resolution      | 75 %          |
| Phase partial Fourier | Off           |
| Slice partial Fourier | Off           |
| Interpolation         | Off           |
| PAT mode              | GRAPPA        |
| Accel. factor PE      | 2             |
| Ref. lines PE         | 40            |
| Accel. factor 3D      | 1             |
| Matrix Coil Mode      | Auto (Triple) |
| Reference scan mode   | Integrated    |
| Image Filter          | Off           |
| Distortion Corr.      | Off           |

|                   |     |
|-------------------|-----|
| Unfiltered images | Off |
| Prescan Normalize | On  |
| Normalize         | Off |
| B1 filter         | Off |
| Raw filter        | Off |
| Elliptical filter | Off |

## Geometry

|                  |             |
|------------------|-------------|
| Multi-slice mode | Interleaved |
| Series           | Interleaved |
| Saturation mode  | Standard    |
| Special sat.     | None        |
| Tim CT mode      | Off         |

## System

|                          |                   |
|--------------------------|-------------------|
| Body                     | Off               |
| HEP                      | On                |
| HEA                      | On                |
| Positioning mode         | FIX               |
| Table position           | H                 |
| Table position           | 0 mm              |
| MSMA                     | S - C - T         |
| Sagittal                 | R >> L            |
| Coronal                  | A >> P            |
| Transversal              | F >> H            |
| Save uncombined          | Off               |
| Coil Combine Mode        | Sum of Squares    |
| AutoAlign                | ---               |
| Auto Coil Select         | Default           |
| Shim mode                | Standard          |
| Adjust with body coil    | Off               |
| Confirm freq. adjustment | Off               |
| Assume Silicone          | Off               |
| ? Ref. amplitude 1H      | 0.000 V           |
| Adjustment Tolerance     | Auto              |
| Adjust volume            |                   |
| ! Position               | R1.0 A34.1 H11.2  |
| ! Orientation            | S > T-1.9 > C-0.3 |
| ! Rotation               | 0.00 deg          |
| ! F >> H                 | 250 mm            |
| ! A >> P                 | 250 mm            |
| ! R >> L                 | 176 mm            |

## Physio

|                 |      |
|-----------------|------|
| 1st Signal/Mode | None |
| Segments        | 1    |
| Tagging         | None |
| Dark blood      | Off  |
| Resp. control   | Off  |

## Inline

|                      |     |
|----------------------|-----|
| Subtract             | Off |
| Liver registration   | Off |
| Std-Dev-Sag          | Off |
| Std-Dev-Cor          | Off |
| Std-Dev-Tra          | Off |
| Std-Dev-Time         | Off |
| MIP-Sag              | Off |
| MIP-Cor              | Off |
| MIP-Tra              | Off |
| MIP-Time             | Off |
| Save original images | On  |

|            |     |
|------------|-----|
| Wash - In  | Off |
| Wash - Out | Off |
| TTP        | Off |
| PEI        | Off |
| MIP - time | Off |

## Sequence

|                      |               |
|----------------------|---------------|
| Introduction         | On            |
| Dimension            | 3D            |
| Elliptical scanning  | On            |
| Phase stabilisation  | Off           |
| Asymmetric echo      | Off           |
| Contrasts            | 1             |
| Bandwidth            | 650 Hz/Px     |
| Flow comp.           | No            |
| Allowed delay        | 0 s           |
| RF pulse type        | Fast          |
| Gradient mode        | Fast          |
| Excitation           | Slab-sel.     |
| RF spoiling          | On            |
| Optimised MT         | On            |
| MT Flip Angle        | 600 deg       |
| MT Duration          | 15000 us      |
| MT Offset            | 4000 Hz       |
| Spoil Moment RO      | 0 us*mT/m     |
| Spoil Moment PE & SS | 25000 us*mT/m |
| MOSAIC Mode          | None          |

## SIEMENS MAGNETOM TrioTim syngo MR B17

\\USER\Rooney\NAIMS\17\_20150527\gre\_wip805\_MT\_32ch\_FA600\_d100kHz

TA: 2:45 PAT: 2 Voxel size: 1.0x1.0x3.0 mm Rel. SNR: 1.00 USER: gre\_wip805

## Properties

|                                               |        |
|-----------------------------------------------|--------|
| Prio Recon                                    | Off    |
| Before measurement                            |        |
| After measurement                             |        |
| Load to viewer                                | On     |
| Inline movie                                  | Off    |
| Auto store images                             | On     |
| Load to stamp segments                        | Off    |
| Load images to graphic segments               | Off    |
| Auto open inline display                      | Off    |
| Start measurement without further preparation | On     |
| Wait for user to start                        | On     |
| Start measurements                            | single |

## Routine

|                    |                   |
|--------------------|-------------------|
| Slab group 1       |                   |
| Slabs              | 1                 |
| Dist. factor       | 20 %              |
| Position           | R1.1 A25.6 H28.5  |
| Orientation        | T > C-9.3 > S1.0  |
| Phase enc. dir.    | R >> L            |
| Rotation           | 88.90 deg         |
| Phase oversampling | 0 %               |
| Slice oversampling | 0.0 %             |
| Slices per slab    | 48                |
| FoV read           | 256 mm            |
| FoV phase          | 75.0 %            |
| Slice thickness    | 3.00 mm           |
| TR                 | 43 ms             |
| TE                 | 2.30 ms           |
| Averages           | 1                 |
| Concatenations     | 1                 |
| Filter             | Prescan Normalize |
| Coil elements      | HEA;HEP           |

## Contrast

|                   |                  |
|-------------------|------------------|
| MTC               | On               |
| Magn. preparation | None             |
| Flip angle        | 10 deg           |
| Fat suppr.        | None             |
| Water suppr.      | None             |
| Averaging mode    | Short term       |
| Reconstruction    | Magn./Phase      |
| Measurements      | 1                |
| Multiple series   | Each measurement |

## Resolution

|                       |               |
|-----------------------|---------------|
| Base resolution       | 256           |
| Phase resolution      | 100 %         |
| Slice resolution      | 75 %          |
| Phase partial Fourier | Off           |
| Slice partial Fourier | Off           |
| Interpolation         | Off           |
| PAT mode              | GRAPPA        |
| Accel. factor PE      | 2             |
| Ref. lines PE         | 40            |
| Accel. factor 3D      | 1             |
| Matrix Coil Mode      | Auto (Triple) |
| Reference scan mode   | Integrated    |
| Image Filter          | Off           |
| Distortion Corr.      | Off           |

|                   |     |
|-------------------|-----|
| Unfiltered images | Off |
| Prescan Normalize | On  |
| Normalize         | Off |
| B1 filter         | Off |
| Raw filter        | Off |
| Elliptical filter | Off |

## Geometry

|                  |             |
|------------------|-------------|
| Multi-slice mode | Interleaved |
| Series           | Interleaved |
| Saturation mode  | Standard    |
| Special sat.     | None        |
| Tim CT mode      | Off         |

## System

|                          |                   |
|--------------------------|-------------------|
| Body                     | Off               |
| HEP                      | On                |
| HEA                      | On                |
| Positioning mode         | FIX               |
| Table position           | H                 |
| Table position           | 0 mm              |
| MSMA                     | S - C - T         |
| Sagittal                 | R >> L            |
| Coronal                  | A >> P            |
| Transversal              | F >> H            |
| Save uncombined          | Off               |
| Coil Combine Mode        | Sum of Squares    |
| AutoAlign                | ---               |
| Auto Coil Select         | Default           |
| Shim mode                | Standard          |
| Adjust with body coil    | Off               |
| Confirm freq. adjustment | Off               |
| Assume Silicone          | Off               |
| ? Ref. amplitude 1H      | 0.000 V           |
| Adjustment Tolerance     | Auto              |
| Adjust volume            |                   |
| ! Position               | R1.0 A34.1 H11.2  |
| ! Orientation            | S > T-1.9 > C-0.3 |
| ! Rotation               | 0.00 deg          |
| ! F >> H                 | 250 mm            |
| ! A >> P                 | 250 mm            |
| ! R >> L                 | 176 mm            |

## Physio

|                 |      |
|-----------------|------|
| 1st Signal/Mode | None |
| Segments        | 1    |
| Tagging         | None |
| Dark blood      | Off  |
| Resp. control   | Off  |

## Inline

|                      |     |
|----------------------|-----|
| Subtract             | Off |
| Liver registration   | Off |
| Std-Dev-Sag          | Off |
| Std-Dev-Cor          | Off |
| Std-Dev-Tra          | Off |
| Std-Dev-Time         | Off |
| MIP-Sag              | Off |
| MIP-Cor              | Off |
| MIP-Tra              | Off |
| MIP-Time             | Off |
| Save original images | On  |

|            |     |
|------------|-----|
| Wash - In  | Off |
| Wash - Out | Off |
| TTP        | Off |
| PEI        | Off |
| MIP - time | Off |

## Sequence

|                      |               |
|----------------------|---------------|
| Introduction         | On            |
| Dimension            | 3D            |
| Elliptical scanning  | On            |
| Phase stabilisation  | Off           |
| Asymmetric echo      | Off           |
| Contrasts            | 1             |
| Bandwidth            | 650 Hz/Px     |
| Flow comp.           | No            |
| Allowed delay        | 0 s           |
| RF pulse type        | Fast          |
| Gradient mode        | Fast          |
| Excitation           | Slab-sel.     |
| RF spoiling          | On            |
| Optimised MT         | On            |
| MT Flip Angle        | 600 deg       |
| MT Duration          | 15000 us      |
| MT Offset            | 100000 Hz     |
| Spoil Moment RO      | 0 us*mT/m     |
| Spoil Moment PE & SS | 25000 us*mT/m |
| MOSAIC Mode          | None          |

## SIEMENS MAGNETOM TrioTim syngo MR B17

\\USER\Rooney\NAIMS\17\_20150527\3D GRE VFA03deg R1

TA: 1:20 PAT: 2 Voxel size: 1.0x1.0x3.0 mm Rel. SNR: 1.00 SIEMENS: gre

## Properties

|                                               |        |
|-----------------------------------------------|--------|
| Prio Recon                                    | Off    |
| Before measurement                            |        |
| After measurement                             |        |
| Load to viewer                                | On     |
| Inline movie                                  | Off    |
| Auto store images                             | On     |
| Load to stamp segments                        | Off    |
| Load images to graphic segments               | Off    |
| Auto open inline display                      | Off    |
| Start measurement without further preparation | On     |
| Wait for user to start                        | On     |
| Start measurements                            | single |

## Routine

|                    |                                      |
|--------------------|--------------------------------------|
| Slab group 1       |                                      |
| Slabs              | 1                                    |
| Dist. factor       | 20 %                                 |
| Position           | R1.1 A25.6 H28.5                     |
| Orientation        | T > C-9.3 > S1.0                     |
| Phase enc. dir.    | R >> L                               |
| Rotation           | 88.90 deg                            |
| Phase oversampling | 0 %                                  |
| Slice oversampling | 0.0 %                                |
| Slices per slab    | 48                                   |
| FoV read           | 256 mm                               |
| FoV phase          | 75.0 %                               |
| Slice thickness    | 3.00 mm                              |
| TR                 | 20.0 ms                              |
| TE                 | 2.30 ms                              |
| Averages           | 1                                    |
| Concatenations     | 1                                    |
| Filter             | Prescan Normalize, Elliptical filter |
| Coil elements      | HEA;HEP                              |

## Contrast

|                   |                  |
|-------------------|------------------|
| MTC               | Off              |
| Magn. preparation | None             |
| Flip angle        | 3 deg            |
| Fat suppr.        | None             |
| Water suppr.      | None             |
| Averaging mode    | Long term        |
| Reconstruction    | Magnitude        |
| Measurements      | 1                |
| Multiple series   | Each measurement |

## Resolution

|                       |               |
|-----------------------|---------------|
| Base resolution       | 256           |
| Phase resolution      | 100 %         |
| Slice resolution      | 100 %         |
| Phase partial Fourier | 7/8           |
| Slice partial Fourier | 7/8           |
| Interpolation         | Off           |
| PAT mode              | GRAPPA        |
| Accel. factor PE      | 2             |
| Ref. lines PE         | 40            |
| Accel. factor 3D      | 1             |
| Matrix Coil Mode      | Auto (Triple) |
| Reference scan mode   | Integrated    |
| Image Filter          | Off           |

|                   |         |
|-------------------|---------|
| Distortion Corr.  | Off     |
| Unfiltered images | Off     |
| Prescan Normalize | On      |
| Normalize         | Off     |
| B1 filter         | Off     |
| Raw filter        | Off     |
| Elliptical filter | On      |
| Mode              | Inplane |

## Geometry

|                  |            |
|------------------|------------|
| Multi-slice mode | Sequential |
| Series           | Ascending  |
| Saturation mode  | Standard   |
| Special sat.     | None       |
| Tim CT mode      | Off        |

## System

|                          |                   |
|--------------------------|-------------------|
| Body                     | Off               |
| HEP                      | On                |
| HEA                      | On                |
| Positioning mode         | FIX               |
| Table position           | H                 |
| Table position           | 0 mm              |
| MSMA                     | S - C - T         |
| Sagittal                 | R >> L            |
| Coronal                  | A >> P            |
| Transversal              | F >> H            |
| Save uncombined          | Off               |
| Coil Combine Mode        | Adaptive Combine  |
| AutoAlign                | ---               |
| Auto Coil Select         | Default           |
| Shim mode                | Standard          |
| Adjust with body coil    | Off               |
| Confirm freq. adjustment | Off               |
| Assume Silicone          | Off               |
| ? Ref. amplitude 1H      | 0.000 V           |
| Adjustment Tolerance     | Auto              |
| Adjust volume            |                   |
| ! Position               | R1.0 A34.1 H11.2  |
| ! Orientation            | S > T-1.9 > C-0.3 |
| ! Rotation               | 0.00 deg          |
| ! F >> H                 | 250 mm            |
| ! A >> P                 | 250 mm            |
| ! R >> L                 | 176 mm            |

## Physio

|                 |      |
|-----------------|------|
| 1st Signal/Mode | None |
| Segments        | 1    |
| Tagging         | None |
| Dark blood      | Off  |
| Resp. control   | Off  |

## Inline

|                    |     |
|--------------------|-----|
| Subtract           | Off |
| Liver registration | Off |
| Std-Dev-Sag        | Off |
| Std-Dev-Cor        | Off |
| Std-Dev-Tra        | Off |
| Std-Dev-Time       | Off |
| MIP-Sag            | Off |
| MIP-Cor            | Off |
| MIP-Tra            | Off |

## SIEMENS MAGNETOM TrioTim syngo MR B17

|                      |     |
|----------------------|-----|
| MIP-Time             | Off |
| Save original images | On  |
| -----                |     |
| Wash - In            | Off |
| Wash - Out           | Off |
| TTP                  | Off |
| PEI                  | Off |
| MIP - time           | Off |

## Sequence

|                     |           |
|---------------------|-----------|
| Introduction        | On        |
| Dimension           | 3D        |
| Elliptical scanning | On        |
| Phase stabilisation | Off       |
| Asymmetric echo     | Off       |
| Contrasts           | 1         |
| Bandwidth           | 650 Hz/Px |
| Flow comp.          | No        |
| Allowed delay       | 0 s       |
| -----               |           |
| RF pulse type       | Fast      |
| Gradient mode       | Fast      |
| Excitation          | Slab-sel. |
| RF spoiling         | On        |

## SIEMENS MAGNETOM TrioTim syngo MR B17

\\USER\Rooney\NAIMS\17\_20150527\3D GRE VFA06deg R1

TA: 1:20 PAT: 2 Voxel size: 1.0x1.0x3.0 mm Rel. SNR: 1.00 SIEMENS: gre

## Properties

|                                               |        |
|-----------------------------------------------|--------|
| Prio Recon                                    | Off    |
| Before measurement                            |        |
| After measurement                             |        |
| Load to viewer                                | On     |
| Inline movie                                  | Off    |
| Auto store images                             | On     |
| Load to stamp segments                        | Off    |
| Load images to graphic segments               | Off    |
| Auto open inline display                      | Off    |
| Start measurement without further preparation | On     |
| Wait for user to start                        | On     |
| Start measurements                            | single |

## Routine

|                    |                                      |
|--------------------|--------------------------------------|
| Slab group 1       |                                      |
| Slabs              | 1                                    |
| Dist. factor       | 20 %                                 |
| Position           | R1.1 A25.6 H28.5                     |
| Orientation        | T > C-9.3 > S1.0                     |
| Phase enc. dir.    | R >> L                               |
| Rotation           | 88.90 deg                            |
| Phase oversampling | 0 %                                  |
| Slice oversampling | 0.0 %                                |
| Slices per slab    | 48                                   |
| FoV read           | 256 mm                               |
| FoV phase          | 75.0 %                               |
| Slice thickness    | 3.00 mm                              |
| TR                 | 20.0 ms                              |
| TE                 | 2.30 ms                              |
| Averages           | 1                                    |
| Concatenations     | 1                                    |
| Filter             | Prescan Normalize, Elliptical filter |
| Coil elements      | HEA;HEP                              |

## Contrast

|                   |                  |
|-------------------|------------------|
| MTC               | Off              |
| Magn. preparation | None             |
| Flip angle        | 6 deg            |
| Fat suppr.        | None             |
| Water suppr.      | None             |
| Averaging mode    | Long term        |
| Reconstruction    | Magnitude        |
| Measurements      | 1                |
| Multiple series   | Each measurement |

## Resolution

|                       |               |
|-----------------------|---------------|
| Base resolution       | 256           |
| Phase resolution      | 100 %         |
| Slice resolution      | 100 %         |
| Phase partial Fourier | 7/8           |
| Slice partial Fourier | 7/8           |
| Interpolation         | Off           |
| PAT mode              | GRAPPA        |
| Accel. factor PE      | 2             |
| Ref. lines PE         | 40            |
| Accel. factor 3D      | 1             |
| Matrix Coil Mode      | Auto (Triple) |
| Reference scan mode   | Integrated    |
| Image Filter          | Off           |

|                   |         |
|-------------------|---------|
| Distortion Corr.  | Off     |
| Unfiltered images | Off     |
| Prescan Normalize | On      |
| Normalize         | Off     |
| B1 filter         | Off     |
| Raw filter        | Off     |
| Elliptical filter | On      |
| Mode              | Inplane |

## Geometry

|                  |            |
|------------------|------------|
| Multi-slice mode | Sequential |
| Series           | Ascending  |
| Saturation mode  | Standard   |
| Special sat.     | None       |
| Tim CT mode      | Off        |

## System

|                          |                   |
|--------------------------|-------------------|
| Body                     | Off               |
| HEP                      | On                |
| HEA                      | On                |
| Positioning mode         | FIX               |
| Table position           | H                 |
| Table position           | 0 mm              |
| MSMA                     | S - C - T         |
| Sagittal                 | R >> L            |
| Coronal                  | A >> P            |
| Transversal              | F >> H            |
| Save uncombined          | Off               |
| Coil Combine Mode        | Adaptive Combine  |
| AutoAlign                | ---               |
| Auto Coil Select         | Default           |
| Shim mode                | Standard          |
| Adjust with body coil    | Off               |
| Confirm freq. adjustment | Off               |
| Assume Silicone          | Off               |
| ? Ref. amplitude 1H      | 0.000 V           |
| Adjustment Tolerance     | Auto              |
| Adjust volume            |                   |
| ! Position               | R1.0 A34.1 H11.2  |
| ! Orientation            | S > T-1.9 > C-0.3 |
| ! Rotation               | 0.00 deg          |
| ! F >> H                 | 250 mm            |
| ! A >> P                 | 250 mm            |
| ! R >> L                 | 176 mm            |

## Physio

|                 |      |
|-----------------|------|
| 1st Signal/Mode | None |
| Segments        | 1    |
| Tagging         | None |
| Dark blood      | Off  |
| Resp. control   | Off  |

## Inline

|                    |     |
|--------------------|-----|
| Subtract           | Off |
| Liver registration | Off |
| Std-Dev-Sag        | Off |
| Std-Dev-Cor        | Off |
| Std-Dev-Tra        | Off |
| Std-Dev-Time       | Off |
| MIP-Sag            | Off |
| MIP-Cor            | Off |
| MIP-Tra            | Off |

## SIEMENS MAGNETOM TrioTim syngo MR B17

|                      |     |
|----------------------|-----|
| MIP-Time             | Off |
| Save original images | On  |
| -----                |     |
| Wash - In            | Off |
| Wash - Out           | Off |
| TTP                  | Off |
| PEI                  | Off |
| MIP - time           | Off |

## Sequence

|                     |           |
|---------------------|-----------|
| Introduction        | On        |
| Dimension           | 3D        |
| Elliptical scanning | On        |
| Phase stabilisation | Off       |
| Asymmetric echo     | Off       |
| Contrasts           | 1         |
| Bandwidth           | 650 Hz/Px |
| Flow comp.          | No        |
| Allowed delay       | 0 s       |
| -----               |           |
| RF pulse type       | Fast      |
| Gradient mode       | Fast      |
| Excitation          | Slab-sel. |
| RF spoiling         | On        |

## SIEMENS MAGNETOM TrioTim syngo MR B17

\\USER\Rooney\NAIMS\17\_20150527\3D GRE VFA10deg R1

TA: 1:20 PAT: 2 Voxel size: 1.0x1.0x3.0 mm Rel. SNR: 1.00 SIEMENS: gre

## Properties

|                                               |        |
|-----------------------------------------------|--------|
| Prio Recon                                    | Off    |
| Before measurement                            |        |
| After measurement                             |        |
| Load to viewer                                | On     |
| Inline movie                                  | Off    |
| Auto store images                             | On     |
| Load to stamp segments                        | Off    |
| Load images to graphic segments               | Off    |
| Auto open inline display                      | Off    |
| Start measurement without further preparation | On     |
| Wait for user to start                        | On     |
| Start measurements                            | single |

## Routine

|                    |                                      |
|--------------------|--------------------------------------|
| Slab group 1       |                                      |
| Slabs              | 1                                    |
| Dist. factor       | 20 %                                 |
| Position           | R1.1 A25.6 H28.5                     |
| Orientation        | T > C-9.3 > S1.0                     |
| Phase enc. dir.    | R >> L                               |
| Rotation           | 88.90 deg                            |
| Phase oversampling | 0 %                                  |
| Slice oversampling | 0.0 %                                |
| Slices per slab    | 48                                   |
| FoV read           | 256 mm                               |
| FoV phase          | 75.0 %                               |
| Slice thickness    | 3.00 mm                              |
| TR                 | 20.0 ms                              |
| TE                 | 2.30 ms                              |
| Averages           | 1                                    |
| Concatenations     | 1                                    |
| Filter             | Prescan Normalize, Elliptical filter |
| Coil elements      | HEA;HEP                              |

## Contrast

|                   |                  |
|-------------------|------------------|
| MTC               | Off              |
| Magn. preparation | None             |
| Flip angle        | 10 deg           |
| Fat suppr.        | None             |
| Water suppr.      | None             |
| Averaging mode    | Long term        |
| Reconstruction    | Magnitude        |
| Measurements      | 1                |
| Multiple series   | Each measurement |

## Resolution

|                       |               |
|-----------------------|---------------|
| Base resolution       | 256           |
| Phase resolution      | 100 %         |
| Slice resolution      | 100 %         |
| Phase partial Fourier | 7/8           |
| Slice partial Fourier | 7/8           |
| Interpolation         | Off           |
| PAT mode              | GRAPPA        |
| Accel. factor PE      | 2             |
| Ref. lines PE         | 40            |
| Accel. factor 3D      | 1             |
| Matrix Coil Mode      | Auto (Triple) |
| Reference scan mode   | Integrated    |
| Image Filter          | Off           |

|                   |         |
|-------------------|---------|
| Distortion Corr.  | Off     |
| Unfiltered images | Off     |
| Prescan Normalize | On      |
| Normalize         | Off     |
| B1 filter         | Off     |
| Raw filter        | Off     |
| Elliptical filter | On      |
| Mode              | Inplane |

## Geometry

|                  |            |
|------------------|------------|
| Multi-slice mode | Sequential |
| Series           | Ascending  |
| Saturation mode  | Standard   |
| Special sat.     | None       |
| Tim CT mode      | Off        |

## System

|                          |                   |
|--------------------------|-------------------|
| Body                     | Off               |
| HEP                      | On                |
| HEA                      | On                |
| Positioning mode         | FIX               |
| Table position           | H                 |
| Table position           | 0 mm              |
| MSMA                     | S - C - T         |
| Sagittal                 | R >> L            |
| Coronal                  | A >> P            |
| Transversal              | F >> H            |
| Save uncombined          | Off               |
| Coil Combine Mode        | Adaptive Combine  |
| AutoAlign                | ---               |
| Auto Coil Select         | Default           |
| Shim mode                | Standard          |
| Adjust with body coil    | Off               |
| Confirm freq. adjustment | Off               |
| Assume Silicone          | Off               |
| ? Ref. amplitude 1H      | 0.000 V           |
| Adjustment Tolerance     | Auto              |
| Adjust volume            |                   |
| ! Position               | R1.0 A34.1 H11.2  |
| ! Orientation            | S > T-1.9 > C-0.3 |
| ! Rotation               | 0.00 deg          |
| ! F >> H                 | 250 mm            |
| ! A >> P                 | 250 mm            |
| ! R >> L                 | 176 mm            |

## Physio

|                 |      |
|-----------------|------|
| 1st Signal/Mode | None |
| Segments        | 1    |
| Tagging         | None |
| Dark blood      | Off  |
| Resp. control   | Off  |

## Inline

|                    |     |
|--------------------|-----|
| Subtract           | Off |
| Liver registration | Off |
| Std-Dev-Sag        | Off |
| Std-Dev-Cor        | Off |
| Std-Dev-Tra        | Off |
| Std-Dev-Time       | Off |
| MIP-Sag            | Off |
| MIP-Cor            | Off |
| MIP-Tra            | Off |

## SIEMENS MAGNETOM TrioTim syngo MR B17

|                      |     |
|----------------------|-----|
| MIP-Time             | Off |
| Save original images | On  |
| -----                |     |
| Wash - In            | Off |
| Wash - Out           | Off |
| TTP                  | Off |
| PEI                  | Off |
| MIP - time           | Off |

## Sequence

|                     |           |
|---------------------|-----------|
| Introduction        | On        |
| Dimension           | 3D        |
| Elliptical scanning | On        |
| Phase stabilisation | Off       |
| Asymmetric echo     | Off       |
| Contrasts           | 1         |
| Bandwidth           | 650 Hz/Px |
| Flow comp.          | No        |
| Allowed delay       | 0 s       |
| -----               |           |
| RF pulse type       | Fast      |
| Gradient mode       | Fast      |
| Excitation          | Slab-sel. |
| RF spoiling         | On        |

## SIEMENS MAGNETOM TrioTim syngo MR B17

\\USER\Rooney\NAIMS\17\_20150527\3D GRE VFA20deg R1

TA: 1:20 PAT: 2 Voxel size: 1.0x1.0x3.0 mm Rel. SNR: 1.00 SIEMENS: gre

## Properties

|                                               |        |
|-----------------------------------------------|--------|
| Prio Recon                                    | Off    |
| Before measurement                            |        |
| After measurement                             |        |
| Load to viewer                                | On     |
| Inline movie                                  | Off    |
| Auto store images                             | On     |
| Load to stamp segments                        | Off    |
| Load images to graphic segments               | Off    |
| Auto open inline display                      | Off    |
| Start measurement without further preparation | On     |
| Wait for user to start                        | On     |
| Start measurements                            | single |

## Routine

|                    |                                      |
|--------------------|--------------------------------------|
| Slab group 1       |                                      |
| Slabs              | 1                                    |
| Dist. factor       | 20 %                                 |
| Position           | R1.1 A25.6 H28.5                     |
| Orientation        | T > C-9.3 > S1.0                     |
| Phase enc. dir.    | R >> L                               |
| Rotation           | 88.90 deg                            |
| Phase oversampling | 0 %                                  |
| Slice oversampling | 0.0 %                                |
| Slices per slab    | 48                                   |
| FoV read           | 256 mm                               |
| FoV phase          | 75.0 %                               |
| Slice thickness    | 3.00 mm                              |
| TR                 | 20.0 ms                              |
| TE                 | 2.30 ms                              |
| Averages           | 1                                    |
| Concatenations     | 1                                    |
| Filter             | Prescan Normalize, Elliptical filter |
| Coil elements      | HEA;HEP                              |

## Contrast

|                   |                  |
|-------------------|------------------|
| MTC               | Off              |
| Magn. preparation | None             |
| Flip angle        | 20 deg           |
| Fat suppr.        | None             |
| Water suppr.      | None             |
| Averaging mode    | Long term        |
| Reconstruction    | Magnitude        |
| Measurements      | 1                |
| Multiple series   | Each measurement |

## Resolution

|                       |               |
|-----------------------|---------------|
| Base resolution       | 256           |
| Phase resolution      | 100 %         |
| Slice resolution      | 100 %         |
| Phase partial Fourier | 7/8           |
| Slice partial Fourier | 7/8           |
| Interpolation         | Off           |
| PAT mode              | GRAPPA        |
| Accel. factor PE      | 2             |
| Ref. lines PE         | 40            |
| Accel. factor 3D      | 1             |
| Matrix Coil Mode      | Auto (Triple) |
| Reference scan mode   | Integrated    |
| Image Filter          | Off           |

|                   |         |
|-------------------|---------|
| Distortion Corr.  | Off     |
| Unfiltered images | Off     |
| Prescan Normalize | On      |
| Normalize         | Off     |
| B1 filter         | Off     |
| Raw filter        | Off     |
| Elliptical filter | On      |
| Mode              | Inplane |

## Geometry

|                  |            |
|------------------|------------|
| Multi-slice mode | Sequential |
| Series           | Ascending  |
| Saturation mode  | Standard   |
| Special sat.     | None       |
| Tim CT mode      | Off        |

## System

|                          |                   |
|--------------------------|-------------------|
| Body                     | Off               |
| HEP                      | On                |
| HEA                      | On                |
| Positioning mode         | FIX               |
| Table position           | H                 |
| Table position           | 0 mm              |
| MSMA                     | S - C - T         |
| Sagittal                 | R >> L            |
| Coronal                  | A >> P            |
| Transversal              | F >> H            |
| Save uncombined          | Off               |
| Coil Combine Mode        | Adaptive Combine  |
| AutoAlign                | ---               |
| Auto Coil Select         | Default           |
| Shim mode                | Standard          |
| Adjust with body coil    | Off               |
| Confirm freq. adjustment | Off               |
| Assume Silicone          | Off               |
| ? Ref. amplitude 1H      | 0.000 V           |
| Adjustment Tolerance     | Auto              |
| Adjust volume            |                   |
| ! Position               | R1.0 A34.1 H11.2  |
| ! Orientation            | S > T-1.9 > C-0.3 |
| ! Rotation               | 0.00 deg          |
| ! F >> H                 | 250 mm            |
| ! A >> P                 | 250 mm            |
| ! R >> L                 | 176 mm            |

## Physio

|                 |      |
|-----------------|------|
| 1st Signal/Mode | None |
| Segments        | 1    |
| Tagging         | None |
| Dark blood      | Off  |
| Resp. control   | Off  |

## Inline

|                    |     |
|--------------------|-----|
| Subtract           | Off |
| Liver registration | Off |
| Std-Dev-Sag        | Off |
| Std-Dev-Cor        | Off |
| Std-Dev-Tra        | Off |
| Std-Dev-Time       | Off |
| MIP-Sag            | Off |
| MIP-Cor            | Off |
| MIP-Tra            | Off |

## SIEMENS MAGNETOM TrioTim syngo MR B17

|                      |     |
|----------------------|-----|
| MIP-Time             | Off |
| Save original images | On  |
| -----                |     |
| Wash - In            | Off |
| Wash - Out           | Off |
| TTP                  | Off |
| PEI                  | Off |
| MIP - time           | Off |

## Sequence

|                     |           |
|---------------------|-----------|
| Introduction        | On        |
| Dimension           | 3D        |
| Elliptical scanning | On        |
| Phase stabilisation | Off       |
| Asymmetric echo     | Off       |
| Contrasts           | 1         |
| Bandwidth           | 650 Hz/Px |
| Flow comp.          | No        |
| Allowed delay       | 0 s       |
| -----               |           |
| RF pulse type       | Fast      |
| Gradient mode       | Fast      |
| Excitation          | Slab-sel. |
| RF spoiling         | On        |

## SIEMENS MAGNETOM TrioTim syngo MR B17

\\USER\Rooney\NAIMS\17\_20150527\3D GRE VFA30deg R1

TA: 1:20 PAT: 2 Voxel size: 1.0x1.0x3.0 mm Rel. SNR: 1.00 SIEMENS: gre

## Properties

|                                               |        |
|-----------------------------------------------|--------|
| Prio Recon                                    | Off    |
| Before measurement                            |        |
| After measurement                             |        |
| Load to viewer                                | On     |
| Inline movie                                  | Off    |
| Auto store images                             | On     |
| Load to stamp segments                        | Off    |
| Load images to graphic segments               | Off    |
| Auto open inline display                      | Off    |
| Start measurement without further preparation | On     |
| Wait for user to start                        | On     |
| Start measurements                            | single |

|                   |         |
|-------------------|---------|
| Distortion Corr.  | Off     |
| Unfiltered images | Off     |
| Prescan Normalize | On      |
| Normalize         | Off     |
| B1 filter         | Off     |
| Raw filter        | Off     |
| Elliptical filter | On      |
| Mode              | Inplane |

## Geometry

|                  |            |
|------------------|------------|
| Multi-slice mode | Sequential |
| Series           | Ascending  |
| Saturation mode  | Standard   |
| Special sat.     | None       |
| Tim CT mode      | Off        |

## Routine

|                    |                                      |
|--------------------|--------------------------------------|
| Slab group 1       |                                      |
| Slabs              | 1                                    |
| Dist. factor       | 20 %                                 |
| Position           | R1.1 A25.6 H28.5                     |
| Orientation        | T > C-9.3 > S1.0                     |
| Phase enc. dir.    | R >> L                               |
| Rotation           | 88.90 deg                            |
| Phase oversampling | 0 %                                  |
| Slice oversampling | 0.0 %                                |
| Slices per slab    | 48                                   |
| FoV read           | 256 mm                               |
| FoV phase          | 75.0 %                               |
| Slice thickness    | 3.00 mm                              |
| TR                 | 20.0 ms                              |
| TE                 | 2.30 ms                              |
| Averages           | 1                                    |
| Concatenations     | 1                                    |
| Filter             | Prescan Normalize, Elliptical filter |
| Coil elements      | HEA;HEP                              |

## System

|                          |                   |
|--------------------------|-------------------|
| Body                     | Off               |
| HEP                      | On                |
| HEA                      | On                |
| Positioning mode         | FIX               |
| Table position           | H                 |
| Table position           | 0 mm              |
| MSMA                     | S - C - T         |
| Sagittal                 | R >> L            |
| Coronal                  | A >> P            |
| Transversal              | F >> H            |
| Save uncombined          | Off               |
| Coil Combine Mode        | Adaptive Combine  |
| AutoAlign                | ---               |
| Auto Coil Select         | Default           |
| Shim mode                | Standard          |
| Adjust with body coil    | Off               |
| Confirm freq. adjustment | Off               |
| Assume Silicone          | Off               |
| ? Ref. amplitude 1H      | 0.000 V           |
| Adjustment Tolerance     | Auto              |
| Adjust volume            |                   |
| ! Position               | R1.0 A34.1 H11.2  |
| ! Orientation            | S > T-1.9 > C-0.3 |
| ! Rotation               | 0.00 deg          |
| ! F >> H                 | 250 mm            |
| ! A >> P                 | 250 mm            |
| ! R >> L                 | 176 mm            |

## Contrast

|                   |                  |
|-------------------|------------------|
| MTC               | Off              |
| Magn. preparation | None             |
| Flip angle        | 30 deg           |
| Fat suppr.        | None             |
| Water suppr.      | None             |
| Averaging mode    | Long term        |
| Reconstruction    | Magnitude        |
| Measurements      | 1                |
| Multiple series   | Each measurement |

## Physio

|                 |      |
|-----------------|------|
| 1st Signal/Mode | None |
| Segments        | 1    |
| Tagging         | None |
| Dark blood      | Off  |
| Resp. control   | Off  |

## Resolution

|                       |               |
|-----------------------|---------------|
| Base resolution       | 256           |
| Phase resolution      | 100 %         |
| Slice resolution      | 100 %         |
| Phase partial Fourier | 7/8           |
| Slice partial Fourier | 7/8           |
| Interpolation         | Off           |
| PAT mode              | GRAPPA        |
| Accel. factor PE      | 2             |
| Ref. lines PE         | 40            |
| Accel. factor 3D      | 1             |
| Matrix Coil Mode      | Auto (Triple) |
| Reference scan mode   | Integrated    |
| Image Filter          | Off           |

## Inline

|                    |     |
|--------------------|-----|
| Subtract           | Off |
| Liver registration | Off |
| Std-Dev-Sag        | Off |
| Std-Dev-Cor        | Off |
| Std-Dev-Tra        | Off |
| Std-Dev-Time       | Off |
| MIP-Sag            | Off |
| MIP-Cor            | Off |
| MIP-Tra            | Off |

## SIEMENS MAGNETOM TrioTim syngo MR B17

|                      |     |
|----------------------|-----|
| MIP-Time             | Off |
| Save original images | On  |
| -----                |     |
| Wash - In            | Off |
| Wash - Out           | Off |
| TTP                  | Off |
| PEI                  | Off |
| MIP - time           | Off |

## Sequence

|                     |           |
|---------------------|-----------|
| Introduction        | On        |
| Dimension           | 3D        |
| Elliptical scanning | On        |
| Phase stabilisation | Off       |
| Asymmetric echo     | Off       |
| Contrasts           | 1         |
| Bandwidth           | 650 Hz/Px |
| Flow comp.          | No        |
| Allowed delay       | 0 s       |
| -----               |           |
| RF pulse type       | Fast      |
| Gradient mode       | Fast      |
| Excitation          | Slab-sel. |
| RF spoiling         | On        |

## SIEMENS MAGNETOM TrioTim syngo MR B17

\\USER\Rooney\NAIMS\17\_20150527\3D GRE dB0

TA: 0:49 PAT: 2 Voxel size: 2.0x2.0x2.0 mm Rel. SNR: 1.00 SIEMENS: gre

## Properties

|                                               |        |
|-----------------------------------------------|--------|
| Prio Recon                                    | Off    |
| Before measurement                            |        |
| After measurement                             |        |
| Load to viewer                                | On     |
| Inline movie                                  | Off    |
| Auto store images                             | On     |
| Load to stamp segments                        | Off    |
| Load images to graphic segments               | Off    |
| Auto open inline display                      | Off    |
| Start measurement without further preparation | On     |
| Wait for user to start                        | On     |
| Start measurements                            | single |

## Routine

|                    |                                      |
|--------------------|--------------------------------------|
| Slab group 1       |                                      |
| Slabs              | 1                                    |
| Dist. factor       | 20 %                                 |
| Position           | R1.5 A24.2 H40.0                     |
| Orientation        | T > C-9.3 > S1.0                     |
| Phase enc. dir.    | R >> L                               |
| Rotation           | 88.90 deg                            |
| Phase oversampling | 0 %                                  |
| Slice oversampling | 0.0 %                                |
| Slices per slab    | 48                                   |
| FoV read           | 256 mm                               |
| FoV phase          | 75.0 %                               |
| Slice thickness    | 2.00 mm                              |
| TR                 | 20.0 ms                              |
| TE 1               | 2.20 ms                              |
| TE 2               | 4.58 ms                              |
| Averages           | 1                                    |
| Concatenations     | 1                                    |
| Filter             | Prescan Normalize, Elliptical filter |
| Coil elements      | HEA;HEP                              |

## Contrast

|                   |                  |
|-------------------|------------------|
| MTC               | Off              |
| Magn. preparation | None             |
| Flip angle        | 10 deg           |
| Fat suppr.        | None             |
| Water suppr.      | None             |
| Averaging mode    | Long term        |
| Reconstruction    | Magnitude        |
| Measurements      | 1                |
| Multiple series   | Each measurement |

## Resolution

|                       |               |
|-----------------------|---------------|
| Base resolution       | 128           |
| Phase resolution      | 100 %         |
| Slice resolution      | 100 %         |
| Phase partial Fourier | 7/8           |
| Slice partial Fourier | 7/8           |
| Interpolation         | Off           |
| PAT mode              | GRAPPA        |
| Accel. factor PE      | 2             |
| Ref. lines PE         | 40            |
| Accel. factor 3D      | 1             |
| Matrix Coil Mode      | Auto (Triple) |
| Reference scan mode   | Integrated    |

|                   |         |
|-------------------|---------|
| Image Filter      | Off     |
| Distortion Corr.  | Off     |
| Unfiltered images | Off     |
| Prescan Normalize | On      |
| Normalize         | Off     |
| B1 filter         | Off     |
| Raw filter        | Off     |
| Elliptical filter | On      |
| Mode              | Inplane |

## Geometry

|                  |            |
|------------------|------------|
| Multi-slice mode | Sequential |
| Series           | Ascending  |
| Saturation mode  | Standard   |
| Special sat.     | None       |
| Tim CT mode      | Off        |

## System

|                          |                  |
|--------------------------|------------------|
| Body                     | Off              |
| HEP                      | On               |
| HEA                      | On               |
| Positioning mode         | FIX              |
| Table position           | H                |
| Table position           | 0 mm             |
| MSMA                     | S - C - T        |
| Sagittal                 | R >> L           |
| Coronal                  | A >> P           |
| Transversal              | F >> H           |
| Save uncombined          | Off              |
| Coil Combine Mode        | Adaptive Combine |
| AutoAlign                | ---              |
| Auto Coil Select         | Default          |
| Shim mode                | Standard         |
| Adjust with body coil    | Off              |
| Confirm freq. adjustment | Off              |
| Assume Silicone          | Off              |
| ? Ref. amplitude 1H      | 0.000 V          |
| Adjustment Tolerance     | Auto             |
| Adjust volume            |                  |
| Position                 | R1.5 A24.2 H40.0 |
| Orientation              | T > C-9.3 > S1.0 |
| Rotation                 | 88.90 deg        |
| A >> P                   | 256 mm           |
| R >> L                   | 192 mm           |
| F >> H                   | 96 mm            |

## Physio

|                 |      |
|-----------------|------|
| 1st Signal/Mode | None |
| Segments        | 1    |
| Tagging         | None |
| Dark blood      | Off  |
| Resp. control   | Off  |

## Inline

|                    |     |
|--------------------|-----|
| Subtract           | Off |
| Liver registration | Off |
| Std-Dev-Sag        | Off |
| Std-Dev-Cor        | Off |
| Std-Dev-Tra        | Off |
| Std-Dev-Time       | Off |
| MIP-Sag            | Off |
| MIP-Cor            | Off |

## SIEMENS MAGNETOM TrioTim syngo MR B17

|                      |     |
|----------------------|-----|
| MIP-Tra              | Off |
| MIP-Time             | Off |
| Save original images | On  |
| -----                |     |
| Wash - In            | Off |
| Wash - Out           | Off |
| TTP                  | Off |
| PEI                  | Off |
| MIP - time           | Off |

## Sequence

|                     |           |
|---------------------|-----------|
| Introduction        | On        |
| Dimension           | 3D        |
| Elliptical scanning | On        |
| Phase stabilisation | Off       |
| Asymmetric echo     | Off       |
| Contrasts           | 2         |
| Bandwidth 1         | 910 Hz/Px |
| Bandwidth 2         | 910 Hz/Px |
| Flow comp. 1        | No        |
| Flow comp. 2        | No        |
| Readout mode        | Monopolar |
| Allowed delay       | 0 s       |
| -----               |           |
| RF pulse type       | Fast      |
| Gradient mode       | Fast      |
| Excitation          | Slab-sel. |
| RF spoiling         | On        |

## SIEMENS MAGNETOM TrioTim syngo MR B17

\\USER\Rooney\NAIMS\V17\_20150527\B1Map(rf\_map)

TA: 1:09

Voxel size: 4.0x4.0x5.0 mm

Rel. SNR: 1.00

SERVICE: rf\_map

## Properties

|                                               |        |
|-----------------------------------------------|--------|
| Prio Recon                                    | Off    |
| Before measurement                            |        |
| After measurement                             |        |
| Load to viewer                                | On     |
| Inline movie                                  | Off    |
| Auto store images                             | On     |
| Load to stamp segments                        | Off    |
| Load images to graphic segments               | Off    |
| Auto open inline display                      | Off    |
| Start measurement without further preparation | On     |
| Wait for user to start                        | Off    |
| Start measurements                            | single |

## Routine

|                 |             |
|-----------------|-------------|
| Slice group 1   |             |
| Slices          | 24          |
| Dist. factor    | 120 %       |
| Position        | Isocenter   |
| Orientation     | Transversal |
| Phase enc. dir. | A >> P      |
| Rotation        | 0.00 deg    |
| FoV read        | 256 mm      |
| FoV phase       | 100.0 %     |
| Slice thickness | 5 mm        |
| TR              | 1000 ms     |
| TE 1            | 14 ms       |
| TE 2            | 14 ms       |
| Averages        | 1           |
| Filter          | None        |
| Coil elements   | BC          |

## Contrast

|              |         |
|--------------|---------|
| Flip angle 1 | 90 deg  |
| Flip angle 2 | 120 deg |
| Flip angle 3 | 60 deg  |
| Flip angle 4 | 135 deg |
| Flip angle 5 | 45 deg  |
| Measurements | 1       |

## Resolution

|                   |           |
|-------------------|-----------|
| Base resolution   | 64        |
| Phase resolution  | 100 %     |
| Matrix Coil Mode  | Auto (CP) |
| Image Filter      | Off       |
| Distortion Corr.  | Off       |
| Prescan Normalize | Off       |
| Normalize         | Off       |
| B1 filter         | Off       |
| Raw filter        | Off       |
| Elliptical filter | Off       |

## Geometry

|        |             |
|--------|-------------|
| Series | Interleaved |
|--------|-------------|

## System

|                  |           |
|------------------|-----------|
| Body             | On        |
| HEP              | Off       |
| Positioning mode | REF       |
| Table position   | H         |
| Table position   | 0 mm      |
| MSMA             | S - C - T |

|                   |                  |
|-------------------|------------------|
| Sagittal          | R >> L           |
| Coronal           | A >> P           |
| Transversal       | F >> H           |
| Save uncombined   | Off              |
| Coil Combine Mode | Adaptive Combine |
| AutoAlign         | ---              |
| Auto Coil Select  | Default          |

|                          |             |
|--------------------------|-------------|
| Shim mode                | Tune up     |
| Adjust with body coil    | Off         |
| Confirm freq. adjustment | Off         |
| Assume Silicone          | Off         |
| ? Ref. amplitude 1H      | 0.000 V     |
| Adjustment Tolerance     | Auto        |
| Adjust volume            |             |
| Position                 | Isocenter   |
| Orientation              | Transversal |
| Rotation                 | 0.00 deg    |
| R >> L                   | 350 mm      |
| A >> P                   | 263 mm      |
| F >> H                   | 350 mm      |

## Sequence

|                 |                  |
|-----------------|------------------|
| Contrasts       | 2                |
| Bandwidth       | 260.416667 Hz/Px |
| T1 Compensation | 1000.0 ms        |
| Angles          | 1                |

## SIEMENS MAGNETOM TrioTim syngo MR B17

\\USER\Rooney\NAIMS\V17\_20150527\MB\_bold\_2mm\_1TR\_MB4iPAT2\_Run1

TA: 4:32 PAT: 2 Voxel size: 2.0x2.0x2.0 mm Rel. SNR: 1.00 USER: cmrr\_mbep2d\_bold

## Properties

|                                               |        |
|-----------------------------------------------|--------|
| Prio Recon                                    | Off    |
| Before measurement                            |        |
| After measurement                             |        |
| Load to viewer                                | On     |
| Inline movie                                  | Off    |
| Auto store images                             | On     |
| Load to stamp segments                        | Off    |
| Load images to graphic segments               | Off    |
| Auto open inline display                      | Off    |
| Start measurement without further preparation | On     |
| Wait for user to start                        | On     |
| Start measurements                            | single |

## Routine

|                          |                               |
|--------------------------|-------------------------------|
| Slice group 1            |                               |
| Slices                   | 60                            |
| Dist. factor             | 0 %                           |
| Position                 | R1.5 A24.2 H40.0              |
| Orientation              | T > C-9.3 > S1.0              |
| Phase enc. dir.          | A >> P                        |
| Rotation                 | -1.10 deg                     |
| Phase oversampling       | 0 %                           |
| FoV read                 | 220 mm                        |
| FoV phase                | 100.0 %                       |
| Slice thickness          | 2.00 mm                       |
| TR                       | 1000 ms                       |
| TE                       | 30.0 ms                       |
| Multi-band accel. factor | 4                             |
| Filter                   | Raw filter, Prescan Normalize |
| Coil elements            | HEA;HEP                       |

## Contrast

|                   |           |
|-------------------|-----------|
| MTC               | Off       |
| Magn. preparation | None      |
| Flip angle        | 55 deg    |
| Fat suppr.        | Fat sat.  |
| Averaging mode    | Long term |
| Reconstruction    | Magnitude |
| Measurements      | 260       |
| Delay in TR       | 0 ms      |
| Multiple series   | Off       |

## Resolution

|                       |               |
|-----------------------|---------------|
| Base resolution       | 110           |
| Phase resolution      | 100 %         |
| Phase partial Fourier | Off           |
| Interpolation         | Off           |
| PAT mode              | GRAPPA        |
| Accel. factor PE      | 2             |
| Ref. lines PE         | 24            |
| Matrix Coil Mode      | Auto (Triple) |
| Reference scan mode   | Single-shot   |
| Distortion Corr.      | Off           |
| Unfiltered images     | Off           |
| Prescan Normalize     | On            |
| Raw filter            | On            |
| Intensity             | Weak          |
| Slope                 | 25            |
| Elliptical filter     | Off           |
| Hamming               | Off           |

## Geometry

|                  |             |
|------------------|-------------|
| Multi-slice mode | Interleaved |
| Series           | Interleaved |
| Special sat.     | None        |

## System

|                          |                  |
|--------------------------|------------------|
| Body                     | Off              |
| HEP                      | On               |
| HEA                      | On               |
| Positioning mode         | FIX              |
| Table position           | H                |
| Table position           | 0 mm             |
| MSMA                     | S - C - T        |
| Sagittal                 | R >> L           |
| Coronal                  | A >> P           |
| Transversal              | F >> H           |
| Coil Combine Mode        | Sum of Squares   |
| AutoAlign                | ---              |
| Auto Coil Select         | Default          |
| Shim mode                | Standard         |
| Adjust with body coil    | Off              |
| Confirm freq. adjustment | Off              |
| Assume Silicone          | Off              |
| ? Ref. amplitude 1H      | 0.000 V          |
| Adjustment Tolerance     | Auto             |
| Adjust volume            |                  |
| ! Position               | R1.5 A24.2 H40.0 |
| ! Orientation            | T > C-9.3 > S1.0 |
| ! Rotation               | 88.90 deg        |
| ! A >> P                 | 256 mm           |
| ! R >> L                 | 192 mm           |
| ! F >> H                 | 96 mm            |

## Physio

|                 |      |
|-----------------|------|
| 1st Signal/Mode | None |
|-----------------|------|

## BOLD

|                         |          |
|-------------------------|----------|
| GLM Statistics          | Off      |
| Dynamic t-maps          | Off      |
| Starting ignore meas    | 0        |
| Ignore after transition | 0        |
| Model transition states | On       |
| Temp. highpass filter   | On       |
| Threshold               | 4.00     |
| Paradigm size           | 3        |
| Meas[1]                 | Baseline |
| Meas[2]                 | Baseline |
| Meas[3]                 | Active   |
| Motion correction       | Off      |
| Spatial filter          | Off      |

## Sequence

|                       |            |
|-----------------------|------------|
| Introduction          | Off        |
| Bandwidth             | 1748 Hz/Px |
| Flow comp.            | No         |
| Free echo spacing     | Off        |
| Echo spacing          | 0.69 ms    |
| EPI factor            | 110        |
| Gradient mode         | Fast       |
| RF spoiling           | Off        |
| Excite pulse duration | 5020 us    |
| Single-band images    | Off        |
| MB LeakBlock kernel   | Off        |

## SIEMENS MAGNETOM TrioTim syngo MR B17

|                          |          |
|--------------------------|----------|
| MB RF phase scramble     | Off      |
| SENSE1 coil combine      | Off      |
| Log physiology to file   | Off      |
| Invert RO/PE polarity    | Off      |
| Online multi-band recon. | Online   |
| FFT scale factor         | 1.00     |
| Triggering scheme        | Standard |
| Starting ignore meas     | 0        |
| Paradigm size            | 2        |
| Multiplier               | 1        |
| Step [1]                 | 1        |
| Step [2]                 | 0        |

## SIEMENS MAGNETOM TrioTim syngo MR B17

\\USER\Rooney\NAIMS\V17\_20150527\MB\_bold\_2mm\_1TR\_MB4iPAT2\_Run2

TA: 4:32 PAT: 2 Voxel size: 2.0x2.0x2.0 mm Rel. SNR: 1.00 USER: cmrr\_mbep2d\_bold

## Properties

|                                               |        |
|-----------------------------------------------|--------|
| Prio Recon                                    | Off    |
| Before measurement                            |        |
| After measurement                             |        |
| Load to viewer                                | On     |
| Inline movie                                  | Off    |
| Auto store images                             | On     |
| Load to stamp segments                        | Off    |
| Load images to graphic segments               | Off    |
| Auto open inline display                      | Off    |
| Start measurement without further preparation | On     |
| Wait for user to start                        | On     |
| Start measurements                            | single |

## Routine

|                          |                               |
|--------------------------|-------------------------------|
| Slice group 1            |                               |
| Slices                   | 60                            |
| Dist. factor             | 0 %                           |
| Position                 | R1.5 A24.2 H40.0              |
| Orientation              | T > C-9.3 > S1.0              |
| Phase enc. dir.          | A >> P                        |
| Rotation                 | -1.10 deg                     |
| Phase oversampling       | 0 %                           |
| FoV read                 | 220 mm                        |
| FoV phase                | 100.0 %                       |
| Slice thickness          | 2.00 mm                       |
| TR                       | 1000 ms                       |
| TE                       | 30.0 ms                       |
| Multi-band accel. factor | 4                             |
| Filter                   | Raw filter, Prescan Normalize |
| Coil elements            | HEA;HEP                       |

## Contrast

|                   |           |
|-------------------|-----------|
| MTC               | Off       |
| Magn. preparation | None      |
| Flip angle        | 55 deg    |
| Fat suppr.        | Fat sat.  |
| Averaging mode    | Long term |
| Reconstruction    | Magnitude |
| Measurements      | 260       |
| Delay in TR       | 0 ms      |
| Multiple series   | Off       |

## Resolution

|                       |               |
|-----------------------|---------------|
| Base resolution       | 110           |
| Phase resolution      | 100 %         |
| Phase partial Fourier | Off           |
| Interpolation         | Off           |
| PAT mode              | GRAPPA        |
| Accel. factor PE      | 2             |
| Ref. lines PE         | 24            |
| Matrix Coil Mode      | Auto (Triple) |
| Reference scan mode   | Single-shot   |
| Distortion Corr.      | Off           |
| Unfiltered images     | Off           |
| Prescan Normalize     | On            |
| Raw filter            | On            |
| Intensity             | Weak          |
| Slope                 | 25            |
| Elliptical filter     | Off           |
| Hamming               | Off           |

## Geometry

|                  |             |
|------------------|-------------|
| Multi-slice mode | Interleaved |
| Series           | Interleaved |
| Special sat.     | None        |

## System

|                          |                  |
|--------------------------|------------------|
| Body                     | Off              |
| HEP                      | On               |
| HEA                      | On               |
| Positioning mode         | FIX              |
| Table position           | H                |
| Table position           | 0 mm             |
| MSMA                     | S - C - T        |
| Sagittal                 | R >> L           |
| Coronal                  | A >> P           |
| Transversal              | F >> H           |
| Coil Combine Mode        | Sum of Squares   |
| AutoAlign                | ---              |
| Auto Coil Select         | Default          |
| Shim mode                | Standard         |
| Adjust with body coil    | Off              |
| Confirm freq. adjustment | Off              |
| Assume Silicone          | Off              |
| ? Ref. amplitude 1H      | 0.000 V          |
| Adjustment Tolerance     | Auto             |
| Adjust volume            |                  |
| ! Position               | R1.5 A24.2 H40.0 |
| ! Orientation            | T > C-9.3 > S1.0 |
| ! Rotation               | 88.90 deg        |
| ! A >> P                 | 256 mm           |
| ! R >> L                 | 192 mm           |
| ! F >> H                 | 96 mm            |

## Physio

|                 |      |
|-----------------|------|
| 1st Signal/Mode | None |
|-----------------|------|

## BOLD

|                         |          |
|-------------------------|----------|
| GLM Statistics          | Off      |
| Dynamic t-maps          | Off      |
| Starting ignore meas    | 0        |
| Ignore after transition | 0        |
| Model transition states | On       |
| Temp. highpass filter   | On       |
| Threshold               | 4.00     |
| Paradigm size           | 3        |
| Meas[1]                 | Baseline |
| Meas[2]                 | Baseline |
| Meas[3]                 | Active   |
| Motion correction       | Off      |
| Spatial filter          | Off      |

## Sequence

|                       |            |
|-----------------------|------------|
| Introduction          | Off        |
| Bandwidth             | 1748 Hz/Px |
| Flow comp.            | No         |
| Free echo spacing     | Off        |
| Echo spacing          | 0.69 ms    |
| EPI factor            | 110        |
| Gradient mode         | Fast       |
| RF spoiling           | Off        |
| Excite pulse duration | 5020 us    |
| Single-band images    | Off        |
| MB LeakBlock kernel   | Off        |

## SIEMENS MAGNETOM TrioTim syngo MR B17

|                          |          |
|--------------------------|----------|
| MB RF phase scramble     | Off      |
| SENSE1 coil combine      | Off      |
| Log physiology to file   | Off      |
| Invert RO/PE polarity    | Off      |
| Online multi-band recon. | Online   |
| FFT scale factor         | 1.00     |
| Triggering scheme        | Standard |
| Starting ignore meas     | 0        |
| Paradigm size            | 2        |
| Multiplier               | 1        |
| Step [1]                 | 1        |
| Step [2]                 | 0        |

## SIEMENS MAGNETOM TrioTim syngo MR B17

\\USER\Rooney\NAIMS\V17\_20150527\MB\_bold\_2mm\_1TR\_MB4IPAT2\_PtoA

TA: 0:22 PAT: 2 Voxel size: 2.0x2.0x2.0 mm Rel. SNR: 1.00 USER: cmrr\_mbep2d\_bold

## Properties

|                                               |        |
|-----------------------------------------------|--------|
| Prio Recon                                    | Off    |
| Before measurement                            |        |
| After measurement                             |        |
| Load to viewer                                | On     |
| Inline movie                                  | Off    |
| Auto store images                             | On     |
| Load to stamp segments                        | Off    |
| Load images to graphic segments               | Off    |
| Auto open inline display                      | Off    |
| Start measurement without further preparation | On     |
| Wait for user to start                        | On     |
| Start measurements                            | single |

## Routine

|                          |                               |
|--------------------------|-------------------------------|
| Slice group 1            |                               |
| Slices                   | 60                            |
| Dist. factor             | 0 %                           |
| Position                 | R1.5 A24.2 H40.0              |
| Orientation              | T > C-9.3 > S1.0              |
| Phase enc. dir.          | P >> A                        |
| Rotation                 | 178.90 deg                    |
| Phase oversampling       | 0 %                           |
| FoV read                 | 220 mm                        |
| FoV phase                | 100.0 %                       |
| Slice thickness          | 2.00 mm                       |
| TR                       | 1000 ms                       |
| TE                       | 30.0 ms                       |
| Multi-band accel. factor | 4                             |
| Filter                   | Raw filter, Prescan Normalize |
| Coil elements            | HEA;HEP                       |

## Contrast

|                   |           |
|-------------------|-----------|
| MTC               | Off       |
| Magn. preparation | None      |
| Flip angle        | 55 deg    |
| Fat suppr.        | Fat sat.  |
| Averaging mode    | Long term |
| Reconstruction    | Magnitude |
| Measurements      | 10        |
| Delay in TR       | 0 ms      |
| Multiple series   | Off       |

## Resolution

|                       |               |
|-----------------------|---------------|
| Base resolution       | 110           |
| Phase resolution      | 100 %         |
| Phase partial Fourier | Off           |
| Interpolation         | Off           |
| PAT mode              | GRAPPA        |
| Accel. factor PE      | 2             |
| Ref. lines PE         | 24            |
| Matrix Coil Mode      | Auto (Triple) |
| Reference scan mode   | Single-shot   |
| Distortion Corr.      | Off           |
| Unfiltered images     | Off           |
| Prescan Normalize     | On            |
| Raw filter            | On            |
| Intensity             | Weak          |
| Slope                 | 25            |
| Elliptical filter     | Off           |
| Hamming               | Off           |

## Geometry

|                  |             |
|------------------|-------------|
| Multi-slice mode | Interleaved |
| Series           | Interleaved |
| Special sat.     | None        |

## System

|                          |                  |
|--------------------------|------------------|
| Body                     | Off              |
| HEP                      | On               |
| HEA                      | On               |
| Positioning mode         | FIX              |
| Table position           | H                |
| Table position           | 0 mm             |
| MSMA                     | S - C - T        |
| Sagittal                 | R >> L           |
| Coronal                  | A >> P           |
| Transversal              | F >> H           |
| Coil Combine Mode        | Sum of Squares   |
| AutoAlign                | ---              |
| Auto Coil Select         | Default          |
| Shim mode                | Standard         |
| Adjust with body coil    | Off              |
| Confirm freq. adjustment | Off              |
| Assume Silicone          | Off              |
| ? Ref. amplitude 1H      | 0.000 V          |
| Adjustment Tolerance     | Auto             |
| Adjust volume            |                  |
| ! Position               | R1.5 A24.2 H40.0 |
| ! Orientation            | T > C-9.3 > S1.0 |
| ! Rotation               | 88.90 deg        |
| ! A >> P                 | 256 mm           |
| ! R >> L                 | 192 mm           |
| ! F >> H                 | 96 mm            |

## Physio

|                 |      |
|-----------------|------|
| 1st Signal/Mode | None |
|-----------------|------|

## BOLD

|                         |          |
|-------------------------|----------|
| GLM Statistics          | Off      |
| Dynamic t-maps          | Off      |
| Starting ignore meas    | 0        |
| Ignore after transition | 0        |
| Model transition states | On       |
| Temp. highpass filter   | On       |
| Threshold               | 4.00     |
| Paradigm size           | 3        |
| Meas[1]                 | Baseline |
| Meas[2]                 | Baseline |
| Meas[3]                 | Active   |
| Motion correction       | Off      |
| Spatial filter          | Off      |

## Sequence

|                       |            |
|-----------------------|------------|
| Introduction          | Off        |
| Bandwidth             | 1748 Hz/Px |
| Flow comp.            | No         |
| Free echo spacing     | Off        |
| Echo spacing          | 0.69 ms    |
| EPI factor            | 110        |
| Gradient mode         | Fast       |
| RF spoiling           | Off        |
| Excite pulse duration | 5020 us    |
| Single-band images    | Off        |
| MB LeakBlock kernel   | Off        |

## SIEMENS MAGNETOM TrioTim syngo MR B17

|                          |          |
|--------------------------|----------|
| MB RF phase scramble     | Off      |
| SENSE1 coil combine      | Off      |
| Log physiology to file   | Off      |
| Invert RO/PE polarity    | Off      |
| Online multi-band recon. | Online   |
| FFT scale factor         | 1.00     |
| Triggering scheme        | Standard |
| Starting ignore meas     | 0        |
| Paradigm size            | 2        |
| Multiplier               | 1        |
| Step [1]                 | 1        |
| Step [2]                 | 0        |

## SIEMENS MAGNETOM TrioTim syngo MR B17

\USER\Rooney\NAIMS\V17\_20150527\cmrr\_mbep2d\_diff

TA: 5:35 PAT: 2 Voxel size: 2.2x2.2x2.2 mm Rel. SNR: 1.00 USER: cmrr\_mbep2d\_diff

## Properties

|                                               |        |
|-----------------------------------------------|--------|
| Prio Recon                                    | Off    |
| Before measurement                            |        |
| After measurement                             |        |
| Load to viewer                                | On     |
| Inline movie                                  | Off    |
| Auto store images                             | On     |
| Load to stamp segments                        | Off    |
| Load images to graphic segments               | Off    |
| Auto open inline display                      | Off    |
| Start measurement without further preparation | On     |
| Wait for user to start                        | On     |
| Start measurements                            | single |

## Routine

|                          |                               |
|--------------------------|-------------------------------|
| Slice group 1            |                               |
| Slices                   | 66                            |
| Dist. factor             | 0 %                           |
| Position                 | R1.5 A24.2 H40.0              |
| Orientation              | T > C-9.3 > S1.0              |
| Phase enc. dir.          | A >> P                        |
| Rotation                 | -1.10 deg                     |
| Phase oversampling       | 0 %                           |
| FoV read                 | 220 mm                        |
| FoV phase                | 100.0 %                       |
| Slice thickness          | 2.20 mm                       |
| TR                       | 4300 ms                       |
| TE                       | 96.0 ms                       |
| Multi-band accel. factor | 2                             |
| Filter                   | Raw filter, Prescan Normalize |
| Coil elements            | HEA;HEP                       |

## Contrast

|                       |          |
|-----------------------|----------|
| MTC                   | Off      |
| Magn. preparation     | None     |
| Flip angle            | 90 deg   |
| Refocus flip angle    | 180 deg  |
| Fat suppr.            | Fat sat. |
| Grad. rev. fat suppr. | Enabled  |

|                 |           |
|-----------------|-----------|
| Averaging mode  | Long term |
| Reconstruction  | Magnitude |
| Measurements    | 1         |
| Delay in TR     | 0 ms      |
| Multiple series | Off       |

## Resolution

|                       |       |
|-----------------------|-------|
| Base resolution       | 100   |
| Phase resolution      | 100 % |
| Phase partial Fourier | 7/8   |
| Interpolation         | Off   |

|                     |               |
|---------------------|---------------|
| PAT mode            | GRAPPA        |
| Accel. factor PE    | 2             |
| Ref. lines PE       | 30            |
| Matrix Coil Mode    | Auto (Triple) |
| Reference scan mode | Single-shot   |

|                   |      |
|-------------------|------|
| Distortion Corr.  | Off  |
| Prescan Normalize | On   |
| Raw filter        | On   |
| Intensity         | Weak |
| Slope             | 25   |
| Elliptical filter | Off  |

Hamming Off

## Geometry

|                  |             |
|------------------|-------------|
| Multi-slice mode | Interleaved |
| Series           | Interleaved |
| Special sat.     | None        |

## System

|                          |                  |
|--------------------------|------------------|
| Body                     | Off              |
| HEP                      | On               |
| HEA                      | On               |
| Positioning mode         | FIX              |
| Table position           | H                |
| Table position           | 0 mm             |
| MSMA                     | S - C - T        |
| Sagittal                 | R >> L           |
| Coronal                  | A >> P           |
| Transversal              | F >> H           |
| Coil Combine Mode        | Sum of Squares   |
| AutoAlign                | ---              |
| Auto Coil Select         | Default          |
| Shim mode                | Standard         |
| Adjust with body coil    | Off              |
| Confirm freq. adjustment | Off              |
| Assume Silicone          | Off              |
| ? Ref. amplitude 1H      | 0.000 V          |
| Adjustment Tolerance     | Auto             |
| Adjust volume            |                  |
| ! Position               | R1.5 A24.2 H40.0 |
| ! Orientation            | T > C-9.3 > S1.0 |
| ! Rotation               | 88.90 deg        |
| ! A >> P                 | 256 mm           |
| ! R >> L                 | 192 mm           |
| ! F >> H                 | 96 mm            |

## Physio

|                 |      |
|-----------------|------|
| 1st Signal/Mode | None |
|-----------------|------|

## Diff

|                       |                        |
|-----------------------|------------------------|
| Diffusion mode        | Free                   |
| Diff. weightings      | 2                      |
| b-value 1             | 0 s/mm <sup>2</sup>    |
| b-value 2             | 2000 s/mm <sup>2</sup> |
| Diff. weighted images | On                     |
| Trace weighted images | On                     |
| Average ADC maps      | On                     |
| Individual ADC maps   | On                     |
| FA maps               | On                     |
| Mosaic                | On                     |
| Tensor                | On                     |
| Noise level           | 40                     |
| Diff. directions      | 72                     |

## Sequence

|                        |            |
|------------------------|------------|
| Introduction           | Off        |
| Bandwidth              | 1924 Hz/Px |
| Free echo spacing      | Off        |
| Echo spacing           | 0.69 ms    |
| EPI factor             | 100        |
| Gradient mode          | Fast       |
| RF spoiling            | Off        |
| Excite pulse duration  | 2560 us    |
| Refocus pulse duration | 5120 us    |
| Diffusion Scheme       | Monopolar  |

## SIEMENS MAGNETOM TrioTim syngo MR B17

|                          |        |
|--------------------------|--------|
| Single-band images       | Off    |
| MB LeakBlock kernel      | Off    |
| MB RF phase scramble     | Off    |
| Time-shifted MB RF       | Off    |
| SENSE1 coil combine      | Off    |
| Log physiology to file   | Off    |
| Invert RO/PE polarity    | Off    |
| Online multi-band recon. | Online |
| FFT scale factor         | 1.00   |

## SIEMENS MAGNETOM TrioTim syngo MR B17

\\USER\Rooney\NAIMS\V17\_20150527\cmrr\_mbep2d\_diff\_PtoA

TA: 5:35 PAT: 2 Voxel size: 2.2x2.2x2.2 mm Rel. SNR: 1.00 USER: cmrr\_mbep2d\_diff

## Properties

|                                               |        |
|-----------------------------------------------|--------|
| Prio Recon                                    | Off    |
| Before measurement                            |        |
| After measurement                             |        |
| Load to viewer                                | On     |
| Inline movie                                  | Off    |
| Auto store images                             | On     |
| Load to stamp segments                        | Off    |
| Load images to graphic segments               | Off    |
| Auto open inline display                      | Off    |
| Start measurement without further preparation | On     |
| Wait for user to start                        | On     |
| Start measurements                            | single |

## Routine

|                          |                               |
|--------------------------|-------------------------------|
| Slice group 1            |                               |
| Slices                   | 66                            |
| Dist. factor             | 0 %                           |
| Position                 | R1.5 A24.2 H40.0              |
| Orientation              | T > C-9.3 > S1.0              |
| Phase enc. dir.          | P >> A                        |
| Rotation                 | 178.90 deg                    |
| Phase oversampling       | 0 %                           |
| FoV read                 | 220 mm                        |
| FoV phase                | 100.0 %                       |
| Slice thickness          | 2.20 mm                       |
| TR                       | 4300 ms                       |
| TE                       | 96.0 ms                       |
| Multi-band accel. factor | 2                             |
| Filter                   | Raw filter, Prescan Normalize |
| Coil elements            | HEA;HEP                       |

## Contrast

|                       |           |
|-----------------------|-----------|
| MTC                   | Off       |
| Magn. preparation     | None      |
| Flip angle            | 90 deg    |
| Refocus flip angle    | 180 deg   |
| Fat suppr.            | Fat sat.  |
| Grad. rev. fat suppr. | Enabled   |
| Averaging mode        | Long term |
| Reconstruction        | Magnitude |
| Measurements          | 1         |
| Delay in TR           | 0 ms      |
| Multiple series       | Off       |

## Resolution

|                       |               |
|-----------------------|---------------|
| Base resolution       | 100           |
| Phase resolution      | 100 %         |
| Phase partial Fourier | 7/8           |
| Interpolation         | Off           |
| PAT mode              | GRAPPA        |
| Accel. factor PE      | 2             |
| Ref. lines PE         | 30            |
| Matrix Coil Mode      | Auto (Triple) |
| Reference scan mode   | Single-shot   |
| Distortion Corr.      | Off           |
| Prescan Normalize     | On            |
| Raw filter            | On            |
| Intensity             | Weak          |
| Slope                 | 25            |
| Elliptical filter     | Off           |

Hamming Off

## Geometry

|                  |             |
|------------------|-------------|
| Multi-slice mode | Interleaved |
| Series           | Interleaved |
| Special sat.     | None        |

## System

|                          |                  |
|--------------------------|------------------|
| Body                     | Off              |
| HEP                      | On               |
| HEA                      | On               |
| Positioning mode         | FIX              |
| Table position           | H                |
| Table position           | 0 mm             |
| MSMA                     | S - C - T        |
| Sagittal                 | R >> L           |
| Coronal                  | A >> P           |
| Transversal              | F >> H           |
| Coil Combine Mode        | Sum of Squares   |
| AutoAlign                | ---              |
| Auto Coil Select         | Default          |
| Shim mode                | Standard         |
| Adjust with body coil    | Off              |
| Confirm freq. adjustment | Off              |
| Assume Silicone          | Off              |
| ? Ref. amplitude 1H      | 0.000 V          |
| Adjustment Tolerance     | Auto             |
| Adjust volume            |                  |
| ! Position               | R1.5 A24.2 H40.0 |
| ! Orientation            | T > C-9.3 > S1.0 |
| ! Rotation               | 88.90 deg        |
| ! A >> P                 | 256 mm           |
| ! R >> L                 | 192 mm           |
| ! F >> H                 | 96 mm            |

## Physio

|                 |      |
|-----------------|------|
| 1st Signal/Mode | None |
|-----------------|------|

## Diff

|                       |                        |
|-----------------------|------------------------|
| Diffusion mode        | Free                   |
| Diff. weightings      | 2                      |
| b-value 1             | 0 s/mm <sup>2</sup>    |
| b-value 2             | 2000 s/mm <sup>2</sup> |
| Diff. weighted images | On                     |
| Trace weighted images | On                     |
| Average ADC maps      | On                     |
| Individual ADC maps   | On                     |
| FA maps               | On                     |
| Mosaic                | On                     |
| Tensor                | On                     |
| Noise level           | 40                     |
| Diff. directions      | 72                     |

## Sequence

|                        |            |
|------------------------|------------|
| Introduction           | Off        |
| Bandwidth              | 1924 Hz/Px |
| Free echo spacing      | Off        |
| Echo spacing           | 0.69 ms    |
| EPI factor             | 100        |
| Gradient mode          | Fast       |
| RF spoiling            | Off        |
| Excite pulse duration  | 2560 us    |
| Refocus pulse duration | 5120 us    |
| Diffusion Scheme       | Monopolar  |

## SIEMENS MAGNETOM TrioTim syngo MR B17

|                          |        |
|--------------------------|--------|
| Single-band images       | Off    |
| MB LeakBlock kernel      | Off    |
| MB RF phase scramble     | Off    |
| Time-shifted MB RF       | Off    |
| SENSE1 coil combine      | Off    |
| Log physiology to file   | Off    |
| Invert RO/PE polarity    | Off    |
| Online multi-band recon. | Online |
| FFT scale factor         | 1.00   |

## SIEMENS MAGNETOM TrioTim syngo MR B17

\\USER\Rooney\NAIMS\17\_20150527\cmrr\_mbep2d\_diff\_6b0\_1b2k\_PtoA

TA: 0:56 PAT: 2 Voxel size: 2.2x2.2x2.2 mm Rel. SNR: 1.00 USER: cmrr\_mbep2d\_diff

## Properties

|                                               |        |
|-----------------------------------------------|--------|
| Prio Recon                                    | Off    |
| Before measurement                            |        |
| After measurement                             |        |
| Load to viewer                                | On     |
| Inline movie                                  | Off    |
| Auto store images                             | On     |
| Load to stamp segments                        | Off    |
| Load images to graphic segments               | Off    |
| Auto open inline display                      | Off    |
| Start measurement without further preparation | On     |
| Wait for user to start                        | On     |
| Start measurements                            | single |

## Routine

|                          |                               |
|--------------------------|-------------------------------|
| Slice group 1            |                               |
| Slices                   | 66                            |
| Dist. factor             | 0 %                           |
| Position                 | R1.5 A24.2 H40.0              |
| Orientation              | T > C-9.3 > S1.0              |
| Phase enc. dir.          | P >> A                        |
| Rotation                 | 178.90 deg                    |
| Phase oversampling       | 0 %                           |
| FoV read                 | 220 mm                        |
| FoV phase                | 100.0 %                       |
| Slice thickness          | 2.20 mm                       |
| TR                       | 4300 ms                       |
| TE                       | 96.0 ms                       |
| Multi-band accel. factor | 2                             |
| Filter                   | Raw filter, Prescan Normalize |
| Coil elements            | HEA;HEP                       |

## Contrast

|                       |           |
|-----------------------|-----------|
| MTC                   | Off       |
| Magn. preparation     | None      |
| Flip angle            | 90 deg    |
| Refocus flip angle    | 180 deg   |
| Fat suppr.            | Fat sat.  |
| Grad. rev. fat suppr. | Enabled   |
| Averaging mode        | Long term |
| Reconstruction        | Magnitude |
| Measurements          | 1         |
| Delay in TR           | 0 ms      |
| Multiple series       | Off       |

## Resolution

|                       |               |
|-----------------------|---------------|
| Base resolution       | 100           |
| Phase resolution      | 100 %         |
| Phase partial Fourier | 7/8           |
| Interpolation         | Off           |
| PAT mode              | GRAPPA        |
| Accel. factor PE      | 2             |
| Ref. lines PE         | 30            |
| Matrix Coil Mode      | Auto (Triple) |
| Reference scan mode   | Single-shot   |
| Distortion Corr.      | Off           |
| Prescan Normalize     | On            |
| Raw filter            | On            |
| Intensity             | Weak          |
| Slope                 | 25            |
| Elliptical filter     | Off           |

Hamming Off

## Geometry

|                  |             |
|------------------|-------------|
| Multi-slice mode | Interleaved |
| Series           | Interleaved |
| Special sat.     | None        |

## System

|                          |                  |
|--------------------------|------------------|
| Body                     | Off              |
| HEP                      | On               |
| HEA                      | On               |
| Positioning mode         | FIX              |
| Table position           | H                |
| Table position           | 0 mm             |
| MSMA                     | S - C - T        |
| Sagittal                 | R >> L           |
| Coronal                  | A >> P           |
| Transversal              | F >> H           |
| Coil Combine Mode        | Sum of Squares   |
| AutoAlign                | ---              |
| Auto Coil Select         | Default          |
| Shim mode                | Standard         |
| Adjust with body coil    | Off              |
| Confirm freq. adjustment | Off              |
| Assume Silicone          | Off              |
| ? Ref. amplitude 1H      | 0.000 V          |
| Adjustment Tolerance     | Auto             |
| Adjust volume            |                  |
| ! Position               | R1.5 A24.2 H40.0 |
| ! Orientation            | T > C-9.3 > S1.0 |
| ! Rotation               | 88.90 deg        |
| ! A >> P                 | 256 mm           |
| ! R >> L                 | 192 mm           |
| ! F >> H                 | 96 mm            |

## Physio

|                 |      |
|-----------------|------|
| 1st Signal/Mode | None |
|-----------------|------|

## Diff

|                       |                        |
|-----------------------|------------------------|
| Diffusion mode        | Free                   |
| Diff. weightings      | 2                      |
| b-value 1             | 0 s/mm <sup>2</sup>    |
| b-value 2             | 2000 s/mm <sup>2</sup> |
| Diff. weighted images | On                     |
| Trace weighted images | Off                    |
| Average ADC maps      | Off                    |
| Individual ADC maps   | Off                    |
| FA maps               | Off                    |
| Mosaic                | On                     |
| Tensor                | Off                    |
| Noise level           | 40                     |
| Diff. directions      | 7                      |

## Sequence

|                        |            |
|------------------------|------------|
| Introduction           | Off        |
| Bandwidth              | 1924 Hz/Px |
| Free echo spacing      | Off        |
| Echo spacing           | 0.69 ms    |
| EPI factor             | 100        |
| Gradient mode          | Fast       |
| RF spoiling            | Off        |
| Excite pulse duration  | 2560 us    |
| Refocus pulse duration | 5120 us    |
| Diffusion Scheme       | Monopolar  |

## SIEMENS MAGNETOM TrioTim syngo MR B17

|                          |        |
|--------------------------|--------|
| Single-band images       | Off    |
| MB LeakBlock kernel      | Off    |
| MB RF phase scramble     | Off    |
| Time-shifted MB RF       | Off    |
| SENSE1 coil combine      | Off    |
| Log physiology to file   | Off    |
| Invert RO/PE polarity    | Off    |
| Online multi-band recon. | Online |
| FFT scale factor         | 1.00   |
